# Supplementary material for: A dual-zwitterion functionalized ultra-hydrophilic metal–organic framework with ingenious synergy for enhanced enrichment of glycopeptides
Source: Royal Society of Chemistry journal article supplement (doi:10.1039/c9cc06785j), 2019-01-01
Supplement: c9cc06785j3.pdf [file c9cc06785j3.pdf]

**Table S5** Identified N-glycoproteins and N-glycopeptides sequence from the tryptic digest of proteins extracted from mouse liver after enrichment by AuGC/ZIF-8

| No. | Sequence                     | Unique Sequence ID | Protein Descriptions                                                                                                     | Protein Group Accessions |
|-----|------------------------------|--------------------|--------------------------------------------------------------------------------------------------------------------------|--------------------------|
| 1   | KAnKSSDLVSA NR               | 3241               | Antithrombin-III OS=Mus musculus GN=Serpinc1 PE=1 SV=1 - [ANT3 MOUSE]                                                    | P32261                   |
| 2   | cHTImNcTQTcPK                | 3727               | Succinate dehydrogenase [ubiquinone] iron-sulfur subunit, mitochondrial OS=Mus musculus GN=Sdhb PE=1 SV=1 - [SDHB MOUSE] | Q9CQA3                   |
| 3   | cGETGHVAIncSK                | 5361               | Cellular nucleic acid-binding protein OS=Mus musculus GN=Cnbp PE=1 SV=2 - [CNBP MOUSE]                                   | P53996                   |
| 4   | KPLVAVHSNVSGQK               | 5844               | Malonyl-CoA-acyl carrier protein transacylase, mitochondrial OS=Mus musculus GN=Mcat PE=1 SV=3 - [FABD MOUSE]            | Q8R3F5                   |
| 5   | KVVDDTNITR                   | 6670               | Keratin, type I cytoskeletal 18 OS=Mus musculus GN=Krt18 PE=1 SV=5 - [K1C18 MOUSE]                                       | P05784                   |
| 6   | ANGTTVHVGHPSK                | 7184               | 60S ribosomal protein L26 OS=Mus musculus GN=Rpl26 PE=1 SV=1 - [RL26 MOUSE]                                              | P61255                   |
| 7   | DGASEEETNLSK                 | 7280               | Carboxylesterase 1D OS=Mus musculus GN=Ces1d PE=1 SV=1 - [CES1D MOUSE]                                                   | Q8VCT4                   |
| 8   | ALInHTVYcSTK                 | 7419               | L-xylulose reductase OS=Mus musculus GN=Dcxr PE=1 SV=2 - [DCXR MOUSE]                                                    | Q91X52                   |
| 9   | SITnTTVcTK                   | 7696               | Splicing factor 1 OS=Mus musculus GN=Sf1 PE=1 SV=6 - [SF01 MOUSE]                                                        | Q64213                   |
| 10  | GYPVYNHTEQTNK                | 7810               | Glycine N-acyltransferase-like protein OS=Mus musculus GN=Gm4952 PE=1 SV=3 - [GLYAL MOUSE]                               | Q5FW57                   |
| 11  | NcTYTQVQTR                   | 7812               | Transcription elongation factor A protein 2 OS=Mus musculus GN=Tcea2 PE=2 SV=2 - [TCEA2 MOUSE]                           | Q9QVN7                   |
| 12  | HHAAYVNNLNATEEK              | 7859               | Superoxide dismutase [Mn], mitochondrial OS=Mus musculus GN=Sod2 PE=1 SV=3 - [SODM MOUSE]                                | P09671                   |
| 13  | EHGPVGLVHVGAHTN TTDKPREEK    | 8480               | Agmatinase, mitochondrial OS=Mus musculus GN=Agmat PE=1 SV=1 - [SPEB_MOUSE]                                              | A2AS89                   |
| 14  | KSPLNKTEVHESYYK              | 8639               | Peroxisomal acyl-coenzyme A oxidase 1 OS=Mus musculus GN=Acox1 PE=1 SV=5 - [ACOX1 MOUSE]                                 | Q9R0H0                   |
| 15  | VVDDTNITR                    | 8665               | Keratin, type I cytoskeletal 18 OS=Mus musculus GN=Krt18 PE=1 SV=5 - [K1C18 MOUSE]                                       | P05784                   |
| 16  | AIqGATSHHLGQNF SK            | 9578               | Bifunctional glutamate/proline-tRNA ligase OS=Mus musculus GN=Eprs PE=1 SV=4 - [SYEP_MOUSE]                              | Q8CGC7                   |
| 17  | TVEINNTDAEGR                 | 9590               | Probable aminopeptidase NPEPL1 OS=Mus musculus GN=Npepl1 PE=1 SV=1 - [PEPL1_MOUSE]                                       | Q6NSR8                   |
| 18  | EHGPVGLVHVGAHTN TTDKPR       | 9858               | Agmatinase, mitochondrial OS=Mus musculus GN=Agmat PE=1 SV=1 - [SPEB_MOUSE]                                              | A2AS89                   |
| 19  | NMSVIAHVDHGK                 | 10160              | Elongation factor 2 OS=Mus musculus GN=Eef2 PE=1 SV=2 - [EF2_MOUSE]                                                      | P58252                   |
| 20  | HVGDLGNVTAGK                 | 10361              | Superoxide dismutase [Cu-Zn] OS=Mus musculus GN=Sod1 PE=1 SV=2 - [SODC_MOUSE]                                            | P08228                   |
| 21  | RFNSANEDNVTQVR               | 11073              | Catalase OS=Mus musculus GN=Cat PE=1 SV=4 - [CATA_MOUSE]                                                                 | P24270                   |
| 22  | SPLNKTEVHESYYK               | 11957              | Peroxisomal acyl-coenzyme A oxidase 1 OS=Mus musculus GN=Acox1 PE=1 SV=5 - [ACOX1_MOUSE]                                 | Q9R0H0                   |
| 23  | GDNQSPIELHTK                 | 12053              | Carbonic anhydrase 3 OS=Mus musculus GN=Ca3 PE=1 SV=3 - [CAH3_MOUSE]                                                     | P16015                   |
| 24  | LIEAEDnMncQMSNITV TYR        | 12092              | Small nuclear ribonucleoprotein Sm D3 OS=Mus musculus GN=Snrpd3 PE=1 SV=1 - [SMD3_MOUSE]                                 | P62320                   |
| 25  | LNFSHGTHEYHAETIK             | 13100              | Pyruvate kinase PKM OS=Mus musculus GN=Pkm PE=1 SV=4 - [KPYM_MOUSE]                                                      | P52480                   |
| 26  | FLTNNNSAIDKQSEK              | 13130              | Cytochrome P450 1A2 OS=Mus musculus GN=Cyp1a2 PE=1 SV=1 - [CP1A2_MOUSE]                                                  | P00186                   |
| 27  | FGTcSQLcNNTK                 | 13943              | Prolow-density lipoprotein receptor-related protein 1 OS=Mus musculus GN=Lrp1 PE=1 SV=1 - [LRP1_MOUSE]                   | Q91ZX7                   |
| 28  | NSSVYHGGVDASGKP QEAVYQNDIHHK | 14058              | Ras GTPase-activating protein-binding protein 2 OS=Mus musculus GN=G3bp2 PE=1 SV=2 - [G3BP2_MOUSE]                       | P97379                   |
| 29  | FnSANEDNVTQVR                | 14694              | Catalase OS=Mus musculus GN=Cat PE=1 SV=4 - [CATA_MOUSE]                                                                 | P24270                   |
| 30  | KTEIYSVELnGTK                | 14895              | Potassium-transporting ATPase alpha chain 2 OS=Mus musculus GN=Atp12a PE=1 SV=3 - [AT12A_MOUSE]                          | Q9Z1W8                   |
| 31  | QNLSIMlqDLDIImmLTF HFFGK     | 14954              | Carnitine O-acetyltransferase OS=Mus musculus GN=Crat PE=1 SV=3 - [CACP_MOUSE]                                           | P47934                   |
| 32  | SYcAEIAHNVSSK                | 15147              | 60S ribosomal protein L32 OS=Mus musculus GN=Rpl32 PE=1 SV=2 - [RL32_MOUSE]                                              | P62911                   |
| 33  | NNTQVLINcR                   | 15233              | Small nuclear ribonucleoprotein Sm D2 OS=Mus musculus GN=Snrpd2 PE=1 SV=1 - [SMD2_MOUSE]                                 | P62317                   |
| 34  | AVAQGNLSSADVQAA K            | 15514              | Cytochrome b-c1 complex subunit 2, mitochondrial OS=Mus musculus GN=Uqcrc2 PE=1 SV=1 - [QCR2_MOUSE]                      | Q9DB77                   |
| 35  | SWNETFHAR                    | 15571              | ATP synthase subunit d, mitochondrial OS=Mus musculus GN=Atp5h PE=1 SV=3 - [ATP5H_MOUSE]                                 | Q9DCX2                   |
| 36  | LKGPNHVSTAcTTGA HAVGDSFR     | 15582              | 3-oxoacyl-[acyl-carrier-protein] synthase, mitochondrial OS=Mus musculus GN=Oxsm PE=1 SV=1 - [OXSM_MOUSE]                | Q9D404                   |
| 37  | ATNLTVSAVR                   | 16055              | Carnitine O-palmitoyltransferase 2, mitochondrial OS=Mus musculus GN=Cpt2 PE=1 SV=2 - [CPT2_MOUSE]                       | P52825                   |
| 38  | GKVVGNNTSGSYSYSI QK          | 16092              | Dimethylglycine dehydrogenase, mitochondrial OS=Mus musculus GN=Dmgdh PE=1 SV=1 - [M2GD_MOUSE]                           | Q9DBT9                   |
| 39  | HQAFEAEALSANQSR              | 16507              | Spectrin alpha chain, non-erythrocytic 1 OS=Mus musculus GN=Sptn1 PE=1 SV=4 - [SPTN1_MOUSE]                              | P16546                   |
| 40  | NTQINNSWGQEER                | 16971              | Galectin-9 OS=Mus musculus GN=Lgals9 PE=1 SV=1 - [LEG9_MOUSE]                                                            | O08573                   |
| 41  | ANHTIYINNLNEK                | 13707              | U1 small nuclear ribonucleoprotein A OS=Mus musculus GN=Snrpa PE=1 SV=3 - [SNRPA_MOUSE]                                  | Q62189                   |
| 42  | GAEAA nVTGPGGVPVQ GSK        | 17793              | Nuclease-sensitive element-binding protein 1 OS=Mus musculus GN=Ybx1 PE=1 SV=3 - [YBOX1_MOUSE]                           | P62960                   |
| 43  | TSDTGEEEAITnSTEA n GK        | 17983              | Basigin OS=Mus musculus GN=Bsg PE=1 SV=2 - [BAS1_MOUSE]                                                                  | P18572                   |
| 44  | KLFNLSKEDDVR                 | 18186              | 40S ribosomal protein S6 OS=Mus musculus GN=Rps6 PE=1 SV=1 - [RS6_MOUSE]                                                 | P62754                   |
| 45  | RVHNATLILSEGLKR              | 18468              | Glycine dehydrogenase (decarboxylating), mitochondrial OS=Mus musculus GN=Gldc PE=1 SV=1 - [GCSP_MOUSE]                  | Q91W43                   |
| 46  | QAVTnPNNTFYATK               | 19299              | Stress-70 protein, mitochondrial OS=Mus musculus GN=Hspa9 PE=1 SV=3 - [GRP75_MOUSE]                                      | P38647                   |
| 47  | KGPGLYVDDNGTR                | 19810              | Proteasome subunit beta type-8 OS=Mus musculus GN=Psm8 PE=1 SV=2 - [PSB8_MOUSE]                                          | P28063                   |

|    |                                                   |       |                                                                                                                                                                 |               |
|----|---------------------------------------------------|-------|-----------------------------------------------------------------------------------------------------------------------------------------------------------------|---------------|
| 48 | DRVTDALNATR                                       | 19972 | 60 kDa heat shock protein, mitochondrial OS=Mus musculus GN=Hspd1 PE=1 SV=1 - [CH60 MOUSE]                                                                      | P63038        |
| 49 | VVGNTTSGSYSYSIQK                                  | 20704 | Dimethylglycine dehydrogenase, mitochondrial OS=Mus musculus GN=Dmgdh PE=1 SV=1 - [M2GD MOUSE]                                                                  | Q9DBT9        |
| 50 | KHPDASVNFSEFSK                                    | 20957 | High mobility group protein B1 OS=Homo sapiens GN=HMGB1 PE=1 SV=3 - [HMGB1 HUMAN]                                                                               | P09429        |
| 51 | HPDASVNFSEFSKK                                    | 21156 | High mobility group protein B1 OS=Homo sapiens GN=HMGB1 PE=1 SV=3 - [HMGB1 HUMAN]                                                                               | P09429        |
| 52 | QGDAlIINASR                                       | 21315 | Probable imidazolonepropionase OS=Mus musculus GN=Amdhd1 PE=1 SV=1 - [HUTI MOUSE]                                                                               | Q9DBA8        |
| 53 | VLTVINQTKQENLR                                    | 21470 | 60S ribosomal protein L35 OS=Mus musculus GN=Rpl35 PE=1 SV=1 - [RL35 MOUSE]                                                                                     | Q6ZWW7        |
| 54 | DGVANVSIEDR                                       | 21510 | Superoxide dismutase [Cu-Zn] OS=Mus musculus GN=Sod1 PE=1 SV=2 - [SODC MOUSE]; Superoxide dismutase [Cu-Zn] OS=Rattus norvegicus GN=Sod1 PE=1 SV=2 - [SODC RAT] | P08228;P07632 |
| 55 | NInSScRPHPGAWLR                                   | 21869 | GDH/6PGL endoplasmic bifunctional protein OS=Mus musculus GN=H6pd PE=1 SV=2 - [G6PE MOUSE]                                                                      | Q8CFX1        |
| 56 | HHAAYVNNLNATEEK YHEALAK                           | 21983 | Superoxide dismutase [Mn], mitochondrial OS=Mus musculus GN=Sod2 PE=1 SV=3 - [SODM MOUSE]                                                                       | P09671        |
| 57 | LNFSHGSHEYHAESIA NIR                              | 23232 | Pyruvate kinase PKLR OS=Mus musculus GN=Pklr PE=1 SV=1 - [KPYR_MOUSE]                                                                                           | P53657        |
| 58 | IEIVVVGTKGNKTER                                   | 23608 | NADH dehydrogenase [ubiquinone] 1 alpha subcomplex assembly factor 3 OS=Mus musculus GN=Ndufaf3 PE=1 SV=1 - [NDUF3_MOUSE]                                       | Q9JKL4        |
| 59 | FTFTSHTPGHQIcLHsn STK                             | 24319 | Transmembrane emp24 domain-containing protein 9 OS=Mus musculus GN=Tmed9 PE=1 SV=2 - [TMED9_MOUSE]                                                              | Q99KF1        |
| 60 | SSSHLPPSSyFnASGR                                  | 24444 | Tripeptidyl-peptidase 1 OS=Mus musculus GN=Tpp1 PE=1 SV=2 - [TPP1_MOUSE]                                                                                        | O89023        |
| 61 | NSSVGLIQLNRPK                                     | 24452 | Enoyl-CoA hydratase, mitochondrial OS=Mus musculus GN=Echs1 PE=1 SV=1 - [ECHM_MOUSE]                                                                            | Q8BH95        |
| 62 | YKPVcNQVcHLyLNQ SK                                | 24683 | Aldo-keto reductase family 1 member C18 OS=Mus musculus GN=Akr1c18 PE=1 SV=2 - [AKC1H_MOUSE]                                                                    | Q8K023        |
| 63 | LREmLNISGPPKAGK GNAGQTNyGFANSTM ER                | 24899 | Cytosol aminopeptidase OS=Mus musculus GN=Lap3 PE=1 SV=3 - [AMPL_MOUSE]                                                                                         | Q9CPY7        |
| 64 | GATLSHHNvNNSMLIG QR                               | 24938 | Fatty acid synthase OS=Mus musculus GN=Fasn PE=1 SV=2 - [FAS_MOUSE]                                                                                             | P19096        |
| 65 | TDYNASVSVDPSSGPE R                                | 25174 | Acyl-CoA synthetase family member 2, mitochondrial OS=Mus musculus GN=Acsf2 PE=1 SV=1 - [ACSF2_MOUSE]                                                           | Q8VCW8        |
| 66 | VFSANSTAAcTELAk                                   | 24973 | Heterogeneous nuclear ribonucleoprotein K OS=Mus musculus GN=Hnrnpk PE=1 SV=1 - [HNRPK_MOUSE]                                                                   | P61979        |
| 67 | FTFTSHTPGDHQIcLHsn STR                            | 25490 | Phosphoribosyl pyrophosphate synthase-associated protein 1 OS=Mus musculus GN=Prpsap1 PE=1 SV=1 - [KPRA_MOUSE]                                                  | Q9D0M1        |
| 68 | TNVSGGAIALGHPLGG SGSR                             | 26031 | Transmembrane emp24 domain-containing protein 4 OS=Mus musculus GN=Tmed4 PE=1 SV=1 - [TMED4_MOUSE]                                                              | Q8R1V4        |
| 69 | LRNPcTSEqNcTSPFSyK mSNTNSNDPNSDIPFAS SNVTLPsYNqPR | 26247 | 3-ketoacyl-CoA thiolase, mitochondrial OS=Mus musculus GN=Acaa2 PE=1 SV=3 - [THIM_MOUSE]                                                                        | Q8BWT1        |
| 70 | TKSENGLEFTSSGSAnT ETTKvNGSLETK                    | 26356 | Integrin beta-1 OS=Mus musculus GN=Itgb1 PE=1 SV=1 - [ITB1_MOUSE]                                                                                               | P09055        |
| 71 | GVTHLnISGLK                                       | 26629 | Zinc finger protein ZAT2 OS=Arabidopsis thaliana GN=ZAT2 PE=1 SV=1 - [ZAT2_ARATH]                                                                               | Q9SIJ0        |
| 72 | GASAINWTLIHGDKK                                   | 26987 | Voltage-dependent anion-selective channel protein 1 OS=Mus musculus GN=Vdac1 PE=1 SV=3 - [VDAC1_MOUSE]                                                          | Q60932        |
| 73 | nSTnFFK                                           | 27430 | Prolow-density lipoprotein receptor-related protein 1 OS=Mus musculus GN=Lrp1 PE=1 SV=1 - [LRP1_MOUSE]                                                          | Q91ZX7        |
| 74 | VGLIGScTNSSyEDmGR KYEDGTISSNATHVEH PLcPPKPGFVR    | 27536 | Cytosolic 10-formyltetrahydrofolate dehydrogenase OS=Mus musculus GN=Aldh111 PE=1 SV=1 - [AL1L1_MOUSE]                                                          | Q8R0Y6        |
| 75 | SQNDKFnVSLTVK                                     | 27633 | Methyltransferase-like protein 6 OS=Mus musculus GN=Mettl6 PE=2 SV=2 - [METL6_MOUSE]                                                                            | Q8BVH9        |
| 76 | ELISNASDALDK                                      | 28314 | Aconitate hydratase, mitochondrial OS=Mus musculus GN=Aco2 PE=1 SV=1 - [ACON_MOUSE]                                                                             | Q99KI0        |
| 77 | NVIIWGNHSSSTQYPDV NHAK                            | 29502 | STAR-related lipid transfer protein 5 OS=Mus musculus GN=Stard5 PE=1 SV=2 - [STAR5_MOUSE]                                                                       | Q9EPQ7        |
| 78 | AQIMNVSWsADHR                                     | 29729 | Integrin alpha-1 OS=Mus musculus GN=Itga1 PE=1 SV=2 - [ITA1_MOUSE]                                                                                              | Q3V3R4        |
| 79 | IAPASnVSHTVVLRPLK                                 | 30364 | Endoplasmic OS=Mus musculus GN=Hsp90b1 PE=1 SV=2 - [ENPL_MOUSE]; Heat shock protein HSP 90-beta OS=Mus musculus GN=Hsp90ab1 PE=1 SV=3 - [HS90B_MOUSE]           | P08113;P11499 |
| 80 | LLQTVGSlyNTSHGFH EEEVKK                           | 30662 | Malate dehydrogenase, cytoplasmic OS=Mus musculus GN=Mdh1 PE=1 SV=3 - [MDHC_MOUSE]                                                                              | P14152        |
| 81 | GVPGAIvNVSSQASQR                                  | 30737 | Lipoamide acyltransferase component of branched-chain alpha-keto acid dehydrogenase complex, mitochondrial OS=Mus musculus GN=Dbt PE=1 SV=2 - [ODB2_MOUSE]      | P53395        |
| 82 | cLLSNLnTSHAPK                                     | 31037 | Translocon-associated protein subunit beta OS=Mus musculus GN=Ssr2 PE=1 SV=1 - [SSRB_MOUSE]                                                                     | Q9CPW5        |
| 83 | GYAFNHsADFETVR                                    | 31114 | L-xylulose reductase OS=Mus musculus GN=Dcxr PE=1 SV=2 - [DCXR_MOUSE]                                                                                           | Q91X52        |
| 84 | KEEnSSyQvInWR                                     | 31337 | Fatty acid synthase OS=Mus musculus GN=Fasn PE=1 SV=2 - [FAS_MOUSE]                                                                                             | P19096        |
| 85 | LLQTVGSlyNTSHGFH EEEVKK                           | 31341 | Actin-related protein 2 OS=Mus musculus GN=Actr2 PE=1 SV=1 - [ARP2_MOUSE]                                                                                       | P61161        |
| 86 | NSTFSELFKK                                        | 5902  | UDP-glucuronosyltransferase 3A1 OS=Mus musculus GN=Ugt3a1 PE=1 SV=1 - [UD3A1_MOUSE]                                                                             | Q3UP75        |
| 87 | YYHGELSYLnVTRK                                    | 31724 | Ethylmalonyl-CoA decarboxylase OS=Mus musculus GN=Echdc1 PE=1 SV=2 - [ECHD1_MOUSE]                                                                              | Q9D9V3        |
| 88 | IADEKYNDTFWK                                      | 31824 | Transketolase OS=Mus musculus GN=Tkt PE=1 SV=1 - [TKT_MOUSE]                                                                                                    | P40142        |
| 89 | IVSNAScTTNcLAPLAK                                 | 32006 | Cathepsin D OS=Mus musculus GN=Ctsd PE=1 SV=1 - [CATD_MOUSE]                                                                                                    | P18242        |
| 90 | PIPGNWnGAGcHTNFST K                               | 32094 | Endoplasmic OS=Mus musculus GN=Hsp90b1 PE=1 SV=2 - [ENPL_MOUSE]                                                                                                 | P08113        |
| 91 | VAVFTANASEIK                                      | 32345 | Glyceraldehyde-3-phosphate dehydrogenase OS=Mus musculus GN=Gapdh PE=1 SV=2 - [G3P_MOUSE]                                                                       | P16858        |
| 92 | HGLLVPNNtTDQELQH IR                               | 32731 | Glutamine synthetase OS=Mus musculus GN=Glu PE=1 SV=6 - [GLNA_MOUSE]; Glutamine synthetase OS=Acomys cahirinus GN=GLUL PE=2 SV=3 - [GLNA_ACOCA]                 | P15105        |
| 93 |                                                   | 32959 | 39S ribosomal protein L1, mitochondrial OS=Mus musculus GN=Mrpl1 PE=1 SV=2 - [RM01_MOUSE]                                                                       | Q99N96        |
| 94 |                                                   | 31149 | Eukaryotic translation initiation factor 6 OS=Mus musculus GN=Eif6 PE=1 SV=2 - [IF6_MOUSE]                                                                      | O55135        |

|     |                                                                                       |       |                                                                                                                                                                               |        |
|-----|---------------------------------------------------------------------------------------|-------|-------------------------------------------------------------------------------------------------------------------------------------------------------------------------------|--------|
| 95  | KFNALFAQGNYSEAAK                                                                      | 24344 | Clathrin heavy chain 1 OS=Mus musculus GN=Cltc PE=1 SV=3 - [CLH1_MOUSE]                                                                                                       | Q68FD5 |
| 96  | GWL RDPNASPGDAGE<br>QAIR                                                              | 33713 | Vinculin OS=Mus musculus GN=Vcl PE=1 SV=4 - [VINC_MOUSE]                                                                                                                      | Q64727 |
| 97  | LVLYLEHNLEK <sub>n</sub> STK                                                          | 34211 | Prosaposin OS=Mus musculus GN=Psap PE=1 SV=2 - [SAP_MOUSE]                                                                                                                    | Q61207 |
| 98  | VVYEAGVFNVTAGHG                                                                       | 34691 | Dihydropyrimidinase OS=Mus musculus GN=Dpys PE=1 SV=2 - [DPYS_MOUSE]                                                                                                          | Q9EQF5 |
| 99  | YLILNATQAESK                                                                          | 34875 | 14-3-3 protein beta/alpha OS=Mus musculus GN=Ywhab PE=1 SV=3 - [1433B_MOUSE]                                                                                                  | Q9CQV8 |
| 100 | STGGAPTFNVTV <sub>m</sub> TA<br>QDKP <sub>ln</sub> FSEDRTPSpY<br>QLAQR                | 35271 | Profilin-1 OS=Mus musculus GN=Pfn1 PE=1 SV=2 - [PROF1_MOUSE]                                                                                                                  | P62962 |
| 101 |                                                                                       | 35520 | 39S ribosomal protein L38, mitochondrial OS=Mus musculus GN=Mrlp38 PE=1 SV=2 - [RM38_MOUSE]                                                                                   | Q8K2M0 |
| 102 | HVGD <sub>LD</sub> GNVTAGKDG<br>V ANVSIEDR                                            | 35746 | Superoxide dismutase [Cu-Zn] OS=Mus musculus GN=Sod1 PE=1 SV=2 - [SODC_MOUSE]                                                                                                 | P08228 |
| 103 | cNVSN <sub>T</sub> HTSH <sub>e</sub> LASGEV<br>mV <sub>n</sub> TLGD <sub>LQ</sub> GNK | 35944 | Selenium-binding protein 2 OS=Mus musculus GN=Selenbp2 PE=1 SV=2 - [SBP2_MOUSE]                                                                                               | Q63836 |
| 104 | EML <sub>ln</sub> ISGPLKAGK                                                           | 36020 | Cytosol aminopeptidase OS=Mus musculus GN=Lap3 PE=1 SV=3 - [AMPL_MOUSE]                                                                                                       | Q9CPY7 |
| 105 | KLGE <sub>Sc</sub> IFAPANVTSEK                                                        | 36134 | 3-hydroxyacyl-CoA dehydrogenase type-2 OS=Mus musculus GN=Hsd17b10 PE=1 SV=4 - [HCD2_MOUSE]                                                                                   | O08756 |
| 106 | KTFAYTNHTVLPEALE<br>R                                                                 | 36374 | Glycogen phosphorylase, liver form OS=Mus musculus GN=Pygl PE=1 SV=4 - [PYGL_MOUSE]<br>Glycogen phosphorylase, liver form OS=Rattus norvegicus GN=Pygl PE=1 SV=5 - [PYGL_RAT] | Q9ET01 |
| 107 | LKPDEGGEVPL <sub>n</sub> VSY<br>KPKQK                                                 | 37534 | ATP-binding cassette sub-family E member 1 OS=Mus musculus GN=Abce1 PE=1 SV=1 - [ABCE1_MOUSE]                                                                                 | P61222 |
| 108 | SELVANNVTLPAGEQR                                                                      | 37560 | Lamina-associated polypeptide 2, isoforms alpha/zeta OS=Mus musculus GN=Tmpo PE=1 SV=4 - [LAP2A_MOUSE]                                                                        | Q61033 |
| 109 | LSQALGNITVVQK                                                                         | 37745 | ATP-dependent (S)-NAD(P)H-hydrate dehydratase OS=Mus musculus GN=Naxd PE=1 SV=1 - [NNRD_MOUSE]                                                                                | Q9CZ42 |
| 110 | VYNVTQHAVGIIVNK                                                                       | 39241 | 60S ribosomal protein L21 OS=Mus musculus GN=Rpl21 PE=1 SV=3 - [RL21_MOUSE]                                                                                                   | O09167 |
| 111 | LM <sub>n</sub> ESLMLVTALNPHI<br>GYDK                                                 | 39409 | Fumarate hydratase, mitochondrial OS=Mus musculus GN=Fh PE=1 SV=3 - [FUMH_MOUSE]                                                                                              | P97807 |
| 112 | NNKNEcVSL <sub>nc</sub> SSqPPL<br>VSHGIGK                                             | 39794 | Double-stranded RNA-binding protein Stauf <sub>n</sub> homolog 1 OS=Mus musculus GN=Stau1 PE=1 SV=1 - [STAU1_MOUSE]                                                           | Q9Z108 |
| 113 | AHFSSL <sub>n</sub> L <sub>T</sub> IR                                                 | 39907 | Integrin alpha-1 OS=Mus musculus GN=Itga1 PE=1 SV=2 - [ITA1_MOUSE]                                                                                                            | Q3V3R4 |
| 114 | KTSFVNFTD <sub>ic</sub> K                                                             | 40364 | Eukaryotic translation initiation factor 2 subunit 2 OS=Mus musculus GN=Elf2s2 PE=1 SV=1 - [IF2B_MOUSE]                                                                       | Q99L45 |
| 115 | LIEQIHPKDDNQHSNA<br>S <sub>QL</sub> ScDIIR                                            | 40641 | Serine/threonine-protein phosphatase 6 regulatory subunit 1 OS=Mus musculus GN=Ppp6r1 PE=1 SV=1 - [PP6R1_MOUSE]                                                               | Q7TSI3 |
| 116 | GENLSLVVHGPGDIR                                                                       | 40812 | Sorbitol dehydrogenase OS=Mus musculus GN=Sord PE=1 SV=3 - [DHSO_MOUSE]                                                                                                       | Q64442 |
| 117 | KVWLDPNETNEIANAN<br>SR                                                                | 41326 | 60S ribosomal protein L19 OS=Mus musculus GN=Rpl19 PE=1 SV=1 - [RL19_MOUSE]                                                                                                   | P84099 |
| 118 | GASAINWTLIHGDK                                                                        | 41706 | Cytosolic 10-formyltetrahydrofolate dehydrogenase OS=Mus musculus GN=Aldh1l1 PE=1 SV=1 - [AL1L1_MOUSE]                                                                        | Q8R0Y6 |
| 119 | ALSSEGKPYVTKEELY<br>QNLTR                                                             | 42227 | Spectrin alpha chain, non-erythrocytic 1 OS=Mus musculus GN=Sptan1 PE=1 SV=4 - [SPTN1_MOUSE]                                                                                  | P16546 |
| 120 | GLSFEGLMGSLPANMS<br>STTSDVR                                                           | 42361 | Forkhead box protein S1 OS=Mus musculus GN=Foxs1 PE=2 SV=2 - [FOXS1_MOUSE]                                                                                                    | Q61574 |
| 121 | IGGDAATTVN <sub>n</sub> NTPDF<br>GFGGQKR                                              | 42546 | Far upstream element-binding protein 2 OS=Mus musculus GN=Khsrp PE=1 SV=2 - [FUBP2_MOUSE]                                                                                     | Q3U0V1 |
| 122 | TILVDNNTW <sub>n</sub> NTHISR                                                         | 43564 | Dolichyl-diphosphooligosaccharide--protein glycosyltransferase subunit STT3A OS=Homo sapiens GN=STT3A PE=1 SV=2 - [STT3A_HUMAN]                                               | P46977 |
| 123 | IGcFALSEPGNGSDAGA<br>ASTTAR                                                           | 43718 | Short-chain specific acyl-CoA dehydrogenase, mitochondrial OS=Mus musculus GN=Acads PE=1 SV=2 - [ACADS_MOUSE]                                                                 | Q07417 |
| 124 | LVQDVANNTNEEAGD<br>GTTTATVLAR                                                         | 44124 | 60 kDa heat shock protein, mitochondrial OS=Mus musculus GN=Hspd1 PE=1 SV=1 - [CH60_MOUSE]                                                                                    | P63038 |
| 125 | NSLVEV <sub>n</sub> QSGLMETM<br>ID <sub>lm</sub> PR                                   | 31489 | Protein TRIGALACTOSYLDIACYLGLYCEROL 2, chloroplastic OS=Arabidopsis thaliana GN=TGD2 PE=1 SV=1 - [TGD2_ARATH]                                                                 | Q9LTR2 |
| 126 | LVSNSLHETSSVFVD<br>SLTK                                                               | 44399 | Filamin-A OS=Mus musculus GN=Flna PE=1 SV=5 - [FLNA_MOUSE]                                                                                                                    | Q8BTM8 |
| 127 | NYKNPhLTISFTAER                                                                       | 44594 | Niemann-Pick C1 protein OS=Mus musculus GN=Npc1 PE=1 SV=2 - [NPC1_MOUSE]                                                                                                      | Q35604 |
| 128 | YYHGELSYL <sub>n</sub> VTR                                                            | 44996 | Cathepsin D OS=Mus musculus GN=Ctsd PE=1 SV=1 - [CATD_MOUSE]                                                                                                                  | P18242 |
| 129 | ETTYDVLGVKPNAT<br>QEELKK                                                              | 45904 | DnaJ homolog subfamily A member 1 OS=Mus musculus GN=Dnaj1 PE=1 SV=1 - [DNJA1_MOUSE]                                                                                          | P63037 |
| 130 | IFVGNVSAAcTSQELR                                                                      | 46527 | RNA-binding protein 14 OS=Mus musculus GN=Rbm14 PE=1 SV=1 - [RBM14_MOUSE]                                                                                                     | Q8C2Q3 |
| 131 | TQLTcSL <sub>n</sub> SSGV <sub>D</sub> IVGH                                           | 46757 | Basigin OS=Mus musculus GN=Bsg PE=1 SV=2 - [BASI_MOUSE]                                                                                                                       | P18572 |
| 132 | NYSVVFP <sub>H</sub> DEPLAGR                                                          | 46759 | Sarcosine dehydrogenase, mitochondrial OS=Mus musculus GN=Sardh PE=1 SV=1 - [SARDH_MOUSE]                                                                                     | Q99LB7 |
| 133 | RVL <sub>YL</sub> PAY <sub>nc</sub> TLRPVSK                                           | 46903 | Fetuin-B OS=Mus musculus GN=Fetub PE=1 SV=1 - [FETUB_MOUSE]                                                                                                                   | Q9QXC1 |
| 134 | AKTGGTYGEDLGADY<br>nLSQVcDGK                                                          | 46948 | Fatty acid synthase OS=Mus musculus GN=Fasn PE=1 SV=2 - [FAS_MOUSE]                                                                                                           | P19096 |
| 135 | TVAGGAWTYNTTSAV<br>TVK                                                                | 47199 | 60S ribosomal protein L37a OS=Mus musculus GN=Rpl37a PE=1 SV=2 - [RL37A_MOUSE]                                                                                                | P61514 |
| 136 | AKLDN <sub>N</sub> TELSFFAK                                                           | 47201 | Isocitrate dehydrogenase [NADP] cytoplasmic OS=Mus musculus GN=Idh1 PE=1 SV=2 - [IDHC_MOUSE]                                                                                  | O88844 |
| 137 | VNNSSLIGVGYTQTLR<br>PGVK                                                              | 47902 | Voltage-dependent anion-selective channel protein 2 OS=Mus musculus GN=Vdac2 PE=1 SV=2 - [VDAC2_MOUSE]                                                                        | Q60930 |
| 138 | LFEENEINLTHIESRPSR                                                                    | 47973 | Phenylalanine-4-hydroxylase OS=Mus musculus GN=Pah PE=1 SV=4 - [PH4H_MOUSE]                                                                                                   | P16331 |
| 139 | DLQNVNITLR                                                                            | 48020 | Prohibitin OS=Mus musculus GN=Phb PE=1 SV=1 - [PHB_MOUSE]                                                                                                                     | P67778 |
| 140 | EcHTIQ <sub>n</sub> YTLWR                                                             | 48187 | Cathepsin Z OS=Mus musculus GN=Ctsz PE=1 SV=1 - [CATZ_MOUSE]                                                                                                                  | Q9WUU7 |
| 141 | TPQEFNPEHFLDDNHS<br>FKK                                                               | 48463 | Cytochrome P450 2F2 OS=Mus musculus GN=Cyp2f2 PE=1 SV=1 - [CP2F2_MOUSE]                                                                                                       | P33267 |
| 142 | MAAMAKPDC <sub>IIT</sub> cDGN<br>NITVK                                                | 48796 | Fatty acid-binding protein, epidermal OS=Mus musculus GN=Fabp5 PE=1 SV=3 - [FABP5_MOUSE]                                                                                      | Q05816 |
| 143 | LLQVVYLH <sub>SN</sub> nITK                                                           | 48872 | Biglycan OS=Homo sapiens GN=BGN PE=1 SV=2 - [PGS1_HUMAN]                                                                                                                      | P21810 |

|     |                                      |       |                                                                                                                                                                                           |               |
|-----|--------------------------------------|-------|-------------------------------------------------------------------------------------------------------------------------------------------------------------------------------------------|---------------|
| 144 | FNALFAQGNYSAAK                       | 49225 | Clathrin heavy chain 1 OS=Mus musculus GN=Cltc PE=1 SV=3 - [CLH1_MOUSE]                                                                                                                   | Q68FD5        |
| 145 | FNGGGHINHTIFWTLSPK                   | 49279 | Superoxide dismutase [Mn], mitochondrial OS=Mus musculus GN=Sod2 PE=1 SV=3 - [SODM_MOUSE]                                                                                                 | P09671        |
| 146 | MIVEcVMNNATcTR                       | 49316 | Fatty acid-binding protein, epidermal OS=Mus musculus GN=Fabp5 PE=1 SV=3 - [FABP5_MOUSE]                                                                                                  | Q05816        |
| 147 | AVAYGEKnLTFQGPLP                     | 49417 | Sialate O-acetyltransferase OS=Mus musculus GN=Siae PE=1 SV=3 - [SIAE_MOUSE]                                                                                                              | P70665        |
| 148 | KNVnISYTVNDSFFPQRKQK                 | 49732 | Carboxylesterase 3A OS=Mus musculus GN=Ces3a PE=1 SV=2 - [EST3A_MOUSE]                                                                                                                    | Q63880        |
| 149 | KYESAYGTQFTPCQLLDDHANNSSKK           | 49974 | Trifunctional enzyme subunit alpha, mitochondrial OS=Mus musculus GN=Hadha PE=1 SV=1 - [ECHA_MOUSE]                                                                                       | Q8BMS1        |
| 150 | TPNLSPEEEQLALR                       | 50068 | Urocanate hydratase OS=Mus musculus GN=Uroc1 PE=1 SV=2 - [HUTU_MOUSE]                                                                                                                     | Q8VC12        |
| 151 | QAQVNLTVVVKDPDPPAGTPcASDIR           | 50077 | Myosin light chain kinase, smooth muscle OS=Mus musculus GN=Mylk PE=1 SV=3 - [MYLK_MOUSE]                                                                                                 | Q6PDN3        |
| 152 | TGHRPPNPAFWWVnGSGTEVK                | 50083 | Acyl-coenzyme A synthetase ACSM5, mitochondrial OS=Mus musculus GN=Acsm5 PE=1 SV=1 - [ACSM5_MOUSE]                                                                                        | Q8BGA8        |
| 153 | AGVSISVHGNLSEEAANQMR                 | 50106 | Oxygen-dependent coproporphyrinogen-III oxidase, mitochondrial OS=Mus musculus GN=Cpox PE=1 SV=2 - [HEM6_MOUSE]                                                                           | P36552        |
| 154 | YTIPPcEHHVnGSRPPcTGEDTPR             | 50120 | Cathepsin B OS=Mus musculus GN=Ctsb PE=1 SV=2 - [CATB_MOUSE]                                                                                                                              | P10605        |
| 155 | LALLDNHSSSEFNVTR                     | 50198 | Lon protease homolog, mitochondrial OS=Mus musculus GN=Lonp1 PE=1 SV=2 - [LONM_MOUSE]                                                                                                     | Q8CGK3        |
| 156 | TQAAAQANITLQEIEAIHK                  | 50668 | Splicing factor 3A subunit 1 OS=Mus musculus GN=Sf3a1 PE=1 SV=1 - [SF3A1_MOUSE]                                                                                                           | Q8K4Z5        |
| 157 | IHVSDQELQSANASVDDSRLEELK             | 50991 | Ubiquitin-like modifier-activating enzyme 1 OS=Homo sapiens GN=UBA1 PE=1 SV=3 - [UBA1_HUMAN] Ubiquitin-like modifier-activating enzyme 1 OS=Mus musculus GN=Uba1 PE=1 SV=1 - [UBA1_MOUSE] | P22314;Q02053 |
| 158 | SIYISGSHDGHInYWDSETGSDSFSGK          | 51279 | WD repeat-containing protein 1 OS=Mus musculus GN=Wdr1 PE=1 SV=3 - [WDR1_MOUSE]                                                                                                           | O88342        |
| 159 | EYNLnFSGSSTVQEVK                     | 51339 | FAS-associated factor 1 OS=Mus musculus GN=Fab1 PE=1 SV=2 - [FAF1_MOUSE]                                                                                                                  | P54731        |
| 160 | NTAIFINISR                           | 51814 | Glyoxylate reductase/hydroxypyruvate reductase OS=Mus musculus GN=Grhpr PE=1 SV=1 - [GRHPR_MOUSE]                                                                                         | Q91Z53        |
| 161 | NETLGGTcLNVGcIPSK                    | 51816 | Dihydrolipoyl dehydrogenase, mitochondrial OS=Mus musculus GN=Dld PE=1 SV=2 - [DLDH_MOUSE]                                                                                                | O08749        |
| 162 | TLVLSNLSYSATK                        | 51914 | Nucleolin OS=Mus musculus GN=Ncl PE=1 SV=2 - [NUCL_MOUSE]                                                                                                                                 | P09405        |
| 163 | VVLHPnHSVVDIGLIK                     | 52012 | Haptoglobin OS=Mus musculus GN=Hp PE=1 SV=1 - [HPT_MOUSE]                                                                                                                                 | Q61646        |
| 164 | KNTNSTLTFVTMSGELK                    | 52014 | Phenazine biosynthesis-like domain-containing protein 2 OS=Mus musculus GN=Pbld2 PE=1 SV=1 - [PBLD2_MOUSE]                                                                                | Q9CXN7        |
| 165 | RSTcTINYSTSLPLAQGIK                  | 52422 | Alpha-aminoacidic semialdehyde dehydrogenase OS=Mus musculus GN=Aldh7a1 PE=1 SV=4 - [AL7A1_MOUSE]                                                                                         | Q9DBF1        |
| 166 | HTPGILSmANAGPnTnGSQFFcTAK            | 52490 | Peptidyl-prolyl cis-trans isomerase A OS=Mus musculus GN=Ppia PE=1 SV=2 - [PIIA_MOUSE]                                                                                                    | P17742        |
| 167 | TDVnYTqLVLDHAR                       | 52532 | Phospholipid hydroperoxide glutathione peroxidase, mitochondrial OS=Mus musculus GN=Gpx4 PE=1 SV=4 - [GPX4_MOUSE]                                                                         | O70325        |
| 168 | VNESSHYDLAFTDVHFKPGQIR               | 52586 | Tripeptidyl-peptidase 2 OS=Mus musculus GN=Tpp2 PE=1 SV=3 - [TPP2_MOUSE]                                                                                                                  | Q64514        |
| 169 | ccPQVHGVVNDTIAFVRQGIQVLVSTSNVSSLEGAR | 52614 | Histidine ammonia-lyase OS=Mus musculus GN=Hal PE=1 SV=1 - [HUTH_MOUSE]                                                                                                                   | P35492        |
| 170 | TVcIEKNETLGGTcLNVGcIPSK              | 52723 | Fatty acid synthase OS=Mus musculus GN=Fasn PE=1 SV=2 - [FAS_MOUSE]                                                                                                                       | P19096        |
| 171 | ELISNASDALDKIR                       | 53053 | Endoplasmic reticulum chaperone protein OS=Mus musculus GN=Hsp90b1 PE=1 SV=2 - [ENPL_MOUSE] Heat shock protein HSP 90-beta OS=Mus musculus GN=Hsp90ab1 PE=1 SV=3 - [HS90B_MOUSE]          | P08113;P11499 |
| 172 | ELISNASDALDKLR                       | 53053 | Endoplasmic reticulum chaperone protein OS=Mus musculus GN=Hsp90b1 PE=1 SV=2 - [ENPL_MOUSE] Heat shock protein HSP 90-beta OS=Mus musculus GN=Hsp90ab1 PE=1 SV=3 - [HS90B_MOUSE]          | P08113;P11499 |
| 173 | TFAYTNHTVLPEALER                     | 53146 | Glycogen phosphorylase, liver form OS=Mus musculus GN=Pygl PE=1 SV=4 - [PYGL_MOUSE] Glycogen phosphorylase, liver form OS=Rattus norvegicus GN=Pygl PE=1 SV=5 - [PYGL_RAT]                | Q9ET01        |
| 174 | ANIQFGEhGTTISAVTN                    | 53765 | Lysosome membrane protein 2 OS=Mus musculus GN=Scarb2 PE=1 SV=3 - [SCR2_MOUSE]                                                                                                            | O35114        |
| 175 | ANNTTYGLAAGVFTK                      | 53834 | Aldehyde dehydrogenase, cytosolic 1 OS=Mus musculus GN=Aldh1a7 PE=1 SV=1 - [ALIA7_MOUSE]                                                                                                  | O35945        |
| 176 | SeEAEVGNWNLTYSK                      | 53843 | START domain-containing protein 10 OS=Mus musculus GN=Stard10 PE=1 SV=1 - [STA10_MOUSE]                                                                                                   | Q9JMD3        |
| 177 | NSSHAGAFVIVTEEAIA                    | 55474 | Alanine--tRNA ligase, cytoplasmic OS=Mus musculus GN=Aars PE=1 SV=1 - [SYAC_MOUSE]                                                                                                        | Q8BGQ7        |
| 178 | TGDFQLHTNVNnGTEFGGSIYQK              | 55561 | Voltage-dependent anion-selective channel protein 2 OS=Mus musculus GN=Vdac2 PE=1 SV=2 - [VDAC2_MOUSE]                                                                                    | Q60930        |
| 179 | TVcIEKNETLGGTcLNVGcIPSK              | 55747 | Dihydrolipoyl dehydrogenase, mitochondrial OS=Mus musculus GN=Dld PE=1 SV=2 - [DLDH_MOUSE]                                                                                                | O08749        |
| 180 | TFSLDKDIVTNVSPR                      | 55957 | Dihydropyrimidine dehydrogenase [NADP(+)] OS=Mus musculus GN=Dpyd PE=1 SV=1 - [DPYD_MOUSE]                                                                                                | Q8CHR6        |
| 181 | KLHINYnLLESVGPLP                     | 56003 | Lumican OS=Mus musculus GN=Lum PE=1 SV=2 - [LUM_MOUSE]                                                                                                                                    | P51885        |
| 182 | DGTVTAGNASGVSDGAGAVIIASEDAVKK        | 56563 | 3-ketoacyl-CoA thiolase, mitochondrial OS=Mus musculus GN=Acaa2 PE=1 SV=3 - [THIM_MOUSE]                                                                                                  | Q8BWT1        |
| 183 | FVGINASDINYSAGR                      | 56565 | Prostaglandin reductase-3 OS=Mus musculus GN=Zadh2 PE=1 SV=1 - [PTGR3_MOUSE]                                                                                                              | Q8BGC4        |
| 184 | IGGDAATTVNnNTPDFGFGGQK               | 57387 | Far upstream element-binding protein 2 OS=Mus musculus GN=Khsrp PE=1 SV=2 - [FUBP2_MOUSE]                                                                                                 | Q3U0V1        |
| 185 | IVNDNPYGNGTAFITTN GATAR              | 57883 | Methylmalonate-semialdehyde dehydrogenase [acylating], mitochondrial OS=Mus musculus GN=Aldh6a1 PE=1 SV=1 - [MMSA_MOUSE]                                                                  | Q9EQ20        |
| 186 | IGLLGYNATTENVDR                      | 57938 | Serine--pyruvate aminotransferase, mitochondrial OS=Mus musculus GN=Agxt PE=1 SV=3 - [SPYA_MOUSE]                                                                                         | O35423        |
| 187 | LNVFKNQDQTDWYTNPNLSGGDPPGNSPNKR      | 57993 | Heterogeneous nuclear ribonucleoprotein L OS=Mus musculus GN=Hnrnp1 PE=1 SV=2 - [HNRPL_MOUSE]                                                                                             | Q8R081        |

|     |                                               |       |                                                                                                                                                                                      |               |
|-----|-----------------------------------------------|-------|--------------------------------------------------------------------------------------------------------------------------------------------------------------------------------------|---------------|
| 188 | SDLNPAngSYPPFQALHQR                           | 58004 | Putative phospholipase B-like 2 OS=Mus musculus GN=P1bd2 PE=1 SV=2 - [PLBL2_MOUSE]                                                                                                   | Q3TCN2        |
| 189 | KDGTVTAGnASGVSDGAGAVIIASEDAVKK                | 58131 | 3-ketoacyl-CoA thiolase, mitochondrial OS=Mus musculus GN=Acaa2 PE=1 SV=3 - [THIM_MOUSE]                                                                                             | Q8BWT1        |
| 190 | EQnYTcHVYHEGLPEPLTLR                          | 58188 | H-2 class I histocompatibility antigen, Q10 alpha chain OS=Mus musculus GN=H2-Q10 PE=1 SV=3 - [HA10_MOUSE]                                                                           | P01898        |
| 191 | SQSSNDTFPTAMHIAAAVEVHK                        | 58450 | Fumarate hydratase, mitochondrial OS=Mus musculus GN=Fh PE=1 SV=3 - [FUMH_MOUSE]                                                                                                     | P97807        |
| 192 | VSTLYANNQSVLqGSTVASVYHK                       | 59091 | Serum paraoxonase/lactonase 3 OS=Mus musculus GN=Pon3 PE=1 SV=2 - [PON3_MOUSE]                                                                                                       | Q62087        |
| 193 | KVNVTVVDYIRPASPATETVPAFSEK                    | 28774 | Staphylococcal nuclease domain-containing protein 1 OS=Mus musculus GN=Snd1 PE=1 SV=1 - [SND1_MOUSE]                                                                                 | Q78PY7        |
| 194 | ATLENVTNLRPVGEDFVWQLGSSSPNFTLEGEK             | 59121 | UPF0587 protein C1orf123 homolog OS=Mus musculus PE=1 SV=1 - [CA123_MOUSE]                                                                                                           | Q8BHG2        |
| 195 |                                               | 59439 | Coatomer subunit beta' OS=Mus musculus GN=Copb2 PE=1 SV=2 - [COPB2_MOUSE]                                                                                                            | O55029        |
| 196 | DGGSTTAGNSSQVSDGAAAVLLAR                      | 59517 | 3-ketoacyl-CoA thiolase A, peroxisomal OS=Mus musculus GN=Acaa1a PE=1 SV=1 - [THIKA_MOUSE]3-ketoacyl-CoA thiolase B, peroxisomal OS=Mus musculus GN=Acaa1b PE=1 SV=1 - [THIKB_MOUSE] | Q921H8;Q8VCH0 |
| 197 | nSTKEEILAALEK                                 | 59548 | Prosaposin OS=Mus musculus GN=Psap PE=1 SV=2 - [SAP_MOUSE]                                                                                                                           | Q61207        |
| 198 | VWLDPNETNEIANANS                              | 59795 | 60S ribosomal protein L19 OS=Mus musculus GN=Rpl19 PE=1 SV=1 - [RL19_MOUSE]                                                                                                          | P84099        |
| 199 | TcLLNETGnEPFQYKNLTKTELEK                      | 59820 | Lysophospholipase-like protein 1 OS=Mus musculus GN=Lypl1 PE=1 SV=3 - [LYPL1_MOUSE]                                                                                                  | Q3UFF7        |
| 200 | VLLnLTTVAANHGTYKLAGATYMDIHQAGGGI              | 59847 | Stabilin-2 OS=Mus musculus GN=Stab2 PE=1 SV=1 - [STAB2_MOUSE]                                                                                                                        | Q8R4U0        |
| 201 | NFTVEHTR                                      | 59906 | Probable imidazolonepropionase OS=Mus musculus GN=Amdhd1 PE=1 SV=1 - [HUTI_MOUSE]                                                                                                    | Q9DBA8        |
| 202 | QVQSLTcEVDALKGTNESLER                         | 60047 | Vimentin OS=Mus musculus GN=Vim PE=1 SV=3 - [VIME_MOUSE]                                                                                                                             | P20152        |
| 203 | TcLLNETGDEPFQYKN                              | 60129 | Glutamine synthetase OS=Mus musculus GN=Glu PE=1 SV=6 - [GLNA_MOUSE]                                                                                                                 | P15105        |
| 204 | TcLLNETGnEPFQYKN                              | 60130 | Glutamine synthetase OS=Acomys cahirinus GN=GLUL PE=2 SV=3 - [GLNA_ACOCA]                                                                                                            |               |
| 205 | VGVNKnQTVTATFGYFR                             | 60262 | Synaptophysin-like protein 1 OS=Mus musculus GN=Syp11 PE=1 SV=2 - [SYPL1_MOUSE]                                                                                                      | O09117        |
| 206 | IVVPLnNRENISDPTSPALDLDPSKtnVSGGAIALGHPLGGSGSR | 60319 | Immunoglobulin J chain OS=Mus musculus GN=Jchain PE=1 SV=4 - [IGJ_MOUSE]                                                                                                             | P01592        |
| 207 |                                               | 61522 | 3-ketoacyl-CoA thiolase, mitochondrial OS=Mus musculus GN=Acaa2 PE=1 SV=3 - [THIM_MOUSE]                                                                                             | Q8BWT1        |
| 208 | QSnGSAIVISSLAGK                               | 61846 | Corticosteroid 11-beta-dehydrogenase isozyme 1 OS=Mus musculus GN=Hsd11b1 PE=1 SV=3 - [DHI1_MOUSE]                                                                                   | P50172        |
| 209 | KLDFIVLnETR                                   | 61996 | Dipeptidyl peptidase 4 OS=Mus musculus GN=Dpp4 PE=1 SV=3 - [DPP4_MOUSE]                                                                                                              | P28843        |
| 210 | InVSYTGERPSSNMVIVDVK                          | 62036 | Pregnancy zone protein OS=Mus musculus GN=Pzp PE=1 SV=3 - [PZP_MOUSE]                                                                                                                | Q61838        |
| 211 | SNNGLAVHIFLcNSSMENR                           | 62265 | Homogentisate 1,2-dioxygenase OS=Mus musculus GN=Hgd PE=1 SV=2 - [HGD_MOUSE]                                                                                                         | O09173        |
| 212 | VNnSSLIGLGYTQTLKPGIK                          | 62307 | Voltage-dependent anion-selective channel protein 1 OS=Mus musculus GN=Vdac1 PE=1 SV=3 - [VDAC1_MOUSE]                                                                               | Q60932        |
| 213 | TcLLNETGnEPFQYK                               | 62484 | Glutamine synthetase OS=Acomys cahirinus GN=GLUL PE=2 SV=3 - [GLNA_ACOCA]                                                                                                            |               |
| 214 | TcLLNETGDEPFQYK                               | 62485 | Glutamine synthetase OS=Mus musculus GN=Glu PE=1 SV=6 - [GLNA_MOUSE]                                                                                                                 | P15105        |
| 215 | NISNQLSIGTDISAEHPELR                          | 62704 | Secernin-2 OS=Mus musculus GN=Scrn2 PE=1 SV=1 - [SCRN2_MOUSE]                                                                                                                        | Q8VCA8        |
| 216 | LFEENEINLTHIESR                               | 62831 | Phenylalanine-4-hydroxylase OS=Mus musculus GN=Pah PE=1 SV=4 - [PH4H_MOUSE]                                                                                                          | P16331        |
| 217 | KYESAYGTQFTPCQLLLDHANSSK                      | 63096 | Trifunctional enzyme subunit alpha, mitochondrial OS=Mus musculus GN=Hadha PE=1 SV=1 - [ECHA_MOUSE]                                                                                  | Q8BMS1        |
| 218 | VDGNDVFAVYNATK                                | 63149 | 2-oxoisovalerate dehydrogenase subunit alpha, mitochondrial OS=Mus musculus GN=Bekdha PE=1 SV=1 - [ODBA_MOUSE]                                                                       | P50136        |
| 219 | AVLKDPNDHTVcYLLFANQSEK                        | 63177 | NADH-cytochrome b5 reductase 3 OS=Mus musculus GN=Cyb5r3 PE=1 SV=3 - [NB5R3_MOUSE]                                                                                                   | Q9DCN2        |
| 220 | TTLVDnNTWNNSHIALVGK                           | 63197 | Dolichyl-diphosphooligosaccharide--protein glycosyltransferase subunit STT3B OS=Mus musculus GN=Stt3b PE=1 SV=2 - [STT3B_MOUSE]                                                      | Q3TDQ1        |
| 221 | VPTPNVSVVDLTcR                                | 63346 | Glyceraldehyde-3-phosphate dehydrogenase OS=Mus musculus GN=Gapdh PE=1 SV=2 - [G3P_MOUSE]                                                                                            | P16858        |
| 222 | DGSDEPGTAAcPnGSFHcTNTGKYKPLYLSSR              | 63461 | Glucosidase 2 subunit beta OS=Mus musculus GN=Prcksh PE=1 SV=1 - [GLU2B_MOUSE]                                                                                                       | O08795        |
| 223 | NLLGYynqSKGGSHITlqGmRGcDVGSDWR                | 63870 | H-2 class I histocompatibility antigen, D-P alpha chain OS=Mus musculus GN=H2-D1 PE=1 SV=1 - [HA14_MOUSE]                                                                            | P14427        |
| 224 | cNEIISWLDKnQTAEKEEFEHQK                       | 64015 | Heat shock cognate 71 kDa protein OS=Mus musculus GN=Hspa8 PE=1 SV=1 - [HSP7C_MOUSE]                                                                                                 | P63017        |
| 225 | GFESPSDNSSAVLLQWHEK                           | 64479 | Actin-related protein 2/3 complex subunit 5 OS=Mus musculus GN=Arpc5 PE=1 SV=3 - [ARPC5_MOUSE]                                                                                       | Q9CPW4        |
| 226 | TGGTYGEDLGADYNLSQVcDGK                        | 64704 | Fatty acid synthase OS=Mus musculus GN=Fasn PE=1 SV=2 - [FAS_MOUSE]                                                                                                                  | P19096        |
| 227 | WSnDSATISFTKPSWGK                             | 55912 | Antigen-presenting glycoprotein CD1d1 OS=Mus musculus GN=Cd1d1 PE=1 SV=3 - [CD1D1_MOUSE]                                                                                             | P11609        |
| 228 | DYRPSAGNnSLYqDTVVFk                           | 64767 | Beta-2-glycoprotein 1 OS=Mus musculus GN=ApoH PE=1 SV=1 - [APOH_MOUSE]                                                                                                               | Q01339        |
| 229 | HLNEIDLfHcIDPNDSK                             | 64845 | Prostaglandin E synthase 3 OS=Mus musculus GN=Ptges3 PE=1 SV=1 - [TEBP_MOUSE]                                                                                                        | Q9R0Q7        |
| 230 | GVDVSVQVWQSQGDT                               | 64850 | Ketohexokinase OS=Mus musculus GN=Khk PE=1 SV=1 - [KHK_MOUSE]                                                                                                                        | P97328        |
| 231 | PcSecIVNNSNGSR                                | 65120 | Murinoglobulin-1 OS=Mus musculus GN=Mug1 PE=1 SV=3 - [MUG1_MOUSE]                                                                                                                    | P28665        |
| 232 | SLGNVnFVSAEAqQSS                              | 65221 | Cytochrome P450 2F2 OS=Mus musculus GN=Cyp2f2 PE=1 SV=1 - [CP2F2_MOUSE]                                                                                                              | P33267        |
| 233 | EPcGSEVATVPETGRKTPQEFNPEHFLDDNHSFK            | 65221 |                                                                                                                                                                                      |               |
| 233 | VYVGNASVAQDITQLQK                             | 65345 | Dual specificity protein phosphatase 3 OS=Mus musculus GN=Dusp3 PE=1 SV=1 - [DUS3_MOUSE]                                                                                             | Q9D7X3        |

|     |                                               |       |                                                                                                                                                                                           |               |
|-----|-----------------------------------------------|-------|-------------------------------------------------------------------------------------------------------------------------------------------------------------------------------------------|---------------|
| 234 | SYIFYDGNKnSTTTDQn<br>FTSAK                    | 65707 | Leukocyte surface antigen CD47 OS=Mus musculus GN=Cd47 PE=1 SV=2 - [CD47_MOUSE]                                                                                                           | Q61735        |
| 235 | IPEHDLDPNVITILKEPV<br>AYVFERnQSVGDPNVD<br>LIR | 65939 | Ribosome-binding protein 1 OS=Mus musculus GN=Rrbp1 PE=1 SV=2 - [RRBP1_MOUSE]                                                                                                             | Q99PL5        |
| 236 | AYVFERnQSVGDPNVD<br>LIR                       | 66174 | Lysosome membrane protein 2 OS=Mus musculus GN=Scarb2 PE=1 SV=3 - [SCR2_MOUSE]                                                                                                            | O35114        |
| 237 | IcDFSNASKPQTIQESTG<br>GIVEVLHK                | 66344 | Peroxisomal multifunctional enzyme type 2 OS=Mus musculus GN=Hsd17b4 PE=1 SV=3 - [DHB4_MOUSE]                                                                                             | P51660        |
| 238 | FVINYDYPNSSEDIHR                              | 66432 | Probable ATP-dependent RNA helicase DDX5 OS=Mus musculus GN=Ddx5 PE=1 SV=2 - [DDX5_MOUSE]                                                                                                 | Q61656        |
| 239 | cNVSSLHTSHcLASGEV<br>MVSTLGLDqGNGK            | 66614 | Selenium-binding protein 1 OS=Mus musculus GN=Selenbp1 PE=1 SV=2 - [SBP1_MOUSE]                                                                                                           | P17563        |
| 240 | IPnNTQWITWSPEGHK                              | 66691 | Dipeptidyl peptidase 4 OS=Mus musculus GN=Dpp4 PE=1 SV=3 - [DPP4_MOUSE]                                                                                                                   | P28843        |
| 241 | TVGIVGNQPNVASGcL<br>DINSSVK                   | 66712 | Propionyl-CoA carboxylase beta chain, mitochondrial OS=Mus musculus GN=Pccb PE=1 SV=2 - [PCCB_MOUSE]                                                                                      | Q99MN9        |
| 242 | IPEHDLDPNVITILK                               | 66952 | Ribosome-binding protein 1 OS=Mus musculus GN=Rrbp1 PE=1 SV=2 - [RRBP1_MOUSE]                                                                                                             | Q99PL5        |
| 243 | LqINQSIIFcnSVnR                               | 67026 | DEAD-box ATP-dependent RNA helicase 12 OS=Arabidopsis thaliana GN=RH12 PE=2 SV=1 - [RH12_ARATH]                                                                                           | Q9M2E0        |
| 244 | FAcNGTVIEHPEYGEVI<br>QLQGDQR                  | 67249 | Eukaryotic translation initiation factor 1b OS=Mus musculus GN=Eif1b PE=1 SV=2 - [EIF1B_MOUSE]Eukaryotic translation initiation factor 1 OS=Mus musculus GN=Eif1 PE=1 SV=2 - [EIF1_MOUSE] | Q9CXU9;P48024 |
| 245 | SYDVPMPPEPDHPFY<br>SNISK                      | 67448 | Phosphoglycerate mutase 1 OS=Mus musculus GN=Pgam1 PE=1 SV=3 - [PGAM1_MOUSE]                                                                                                              | Q9DBJ1        |
| 246 | AVITVPAYFNDSQR                                | 68012 | Heat shock 70 kDa protein 7, chloroplastic OS=Arabidopsis thaliana GN=HSP70-7 PE=2 SV=1 - [HSP7G_ARATH]                                                                                   | Q9LTX9        |
| 247 | VNLSFSAQSLPASDTH<br>LK                        | 68059 | Pregnancy zone protein OS=Mus musculus GN=Pzp PE=1 SV=3 - [PZP_MOUSE]                                                                                                                     | Q61838        |
| 248 | FSPNSSNPIIVScGWDK                             | 68547 | Receptor of activated protein C kinase 1 OS=Mus musculus GN=Rack1 PE=1 SV=3 - [RACK1_MOUSE]                                                                                               | P68040        |
| 249 | cFANKVnLSFPSAqSLP<br>ASDTHLK                  | 68908 | Pregnancy zone protein OS=Mus musculus GN=Pzp PE=1 SV=3 - [PZP_MOUSE]                                                                                                                     | Q61838        |
| 250 | SGVDQYDAWNQTSVI<br>HLQAAK                     | 69057 | Peroxisomal acyl-coenzyme A oxidase 2 OS=Mus musculus GN=Acox2 PE=1 SV=2 - [ACOX2_MOUSE]                                                                                                  | Q9QXD1        |
| 251 | FAVELEGEQISVPPST<br>NHTVYR                    | 69357 | Delta-1-pyrroline-5-carboxylate dehydrogenase, mitochondrial OS=Mus musculus GN=Aldh4a1 PE=1 SV=3 - [AL4A1_MOUSE]                                                                         | Q8CHT0        |
| 252 | DQDcDKFNqCgTcTEFK<br>EcHTIqNYTLWR             | 69426 | Cathepsin Z OS=Mus musculus GN=Ctsz PE=1 SV=1 - [CATZ_MOUSE]                                                                                                                              | Q9WUU7        |
| 253 | SKEVAWNLTSVDLVR                               | 69954 | Peroxisomal acyl-coenzyme A oxidase 1 OS=Homo sapiens GN=ACOX1 PE=1 SV=3 - [ACOX1_HUMAN]Peroxisomal acyl-coenzyme A oxidase 1 OS=Mus musculus GN=Acox1 PE=1 SV=5 - [ACOX1_MOUSE]          | Q15067;Q9R0H0 |
| 254 | NVnISYTVNDSFFPQRP<br>QK                       | 70043 | Carboxylesterase 3A OS=Mus musculus GN=Ces3a PE=1 SV=2 - [EST3A_MOUSE]                                                                                                                    | Q63880        |
| 255 | HNnDTQHIWESDSNEF<br>SVIADPR                   | 70348 | Endoplasmic reticulum chaperone protein OS=Mus musculus GN=Hsp90b1 PE=1 SV=2 - [ENPL_MOUSE]                                                                                               | P08113        |
| 256 | GVFITnETGQPLIGK                               | 70673 | Lysosomal alpha-glucosidase OS=Mus musculus GN=Gaa PE=1 SV=2 - [LYAG_MOUSE]                                                                                                               | P70699        |
| 257 | TVTNAVVTVPAYFNDS<br>QR                        | 71436 | Heat shock cognate 71 kDa protein OS=Homo sapiens GN=HSPA8 PE=1 SV=1 - [HSP7C_HUMAN]Heat shock cognate 71 kDa protein OS=Mus musculus GN=Hspa8 PE=1 SV=1 - [HSP7C_MOUSE]                  | P11142;P63017 |
| 258 | VSHLLGINVDFTR                                 | 72125 | Myosin-9 OS=Mus musculus GN=Myh9 PE=1 SV=4 - [MYH9_MOUSE]                                                                                                                                 | Q8VDD5        |
| 259 | IADEKYNDTFWKEFGT<br>NIK                       | 72267 | Endoplasmic reticulum chaperone protein OS=Mus musculus GN=Hsp90b1 PE=1 SV=2 - [ENPL_MOUSE]                                                                                               | P08113        |
| 260 | LDVGNFSWGSEccTR                               | 72356 | 40S ribosomal protein S8 OS=Mus musculus GN=Rps8 PE=1 SV=2 - [RS8_MOUSE]                                                                                                                  | P62242        |
| 261 | HIDcASVYGNETEIGEA<br>LKEVSGSK                 | 72536 | Alcohol dehydrogenase [NADP(+)] OS=Mus musculus GN=Akr1a1 PE=1 SV=3 - [AK1A1_MOUSE]                                                                                                       | Q9JI16        |
| 262 | ANNNTTYGLAAGLFTK                              | 73240 | Retinal dehydrogenase 1 OS=Mus musculus GN=Aldh1a1 PE=1 SV=5 - [AL1A1_MOUSE]                                                                                                              | P24549        |
| 263 | AFQFVETHGEVcPANW<br>TPESPTIKPSPTASK           | 73589 | Thioredoxin-dependent peroxide reductase, mitochondrial OS=Mus musculus GN=Prdx3 PE=1 SV=1 - [PRDX3_MOUSE]                                                                                | P20108        |
| 264 | RDYRPTWTLnQTEPV<br>AGNYYPVNTN                 | 73764 | Lysosomal alpha-mannosidase OS=Mus musculus GN=Man2b1 PE=1 SV=4 - [MA2B1_MOUSE]                                                                                                           | O09159        |
| 265 | AcVDTALENLSTLK                                | 73865 | Fatty acid synthase OS=Mus musculus GN=Fasn PE=1 SV=2 - [FAS_MOUSE]                                                                                                                       | P19096        |
| 266 | STcTINYSTSLPLAQGIK                            | 73641 | Alpha-aminoacidic semialdehyde dehydrogenase OS=Mus musculus GN=Aldh7a1 PE=1 SV=4 - [AL7A1_MOUSE]                                                                                         | Q9DBF1        |
| 267 | HQSGGNFFPTLLSNV<br>TR                         | 73959 | Succinate-semialdehyde dehydrogenase, mitochondrial OS=Mus musculus GN=Aldh5a1 PE=1 SV=1 - [SSDH_MOUSE]                                                                                   | Q8BWF0        |
| 268 | LHINYNnLTESVGPLPK                             | 74467 | Lumican OS=Mus musculus GN=Lum PE=1 SV=2 - [LUM_MOUSE]                                                                                                                                    | P51885        |
| 269 | GKLGVLGVNLSLDGV                               | 74661 | ATP-citrate synthase OS=Mus musculus GN=Acly PE=1 SV=1 - [ACLY_MOUSE]                                                                                                                     | Q91V92        |
| 270 | EnVTATLVELGR                                  | 74960 | UDP-glucuronosyltransferase 1-1 OS=Mus musculus GN=Ugt1a1 PE=1 SV=2 - [UD11_MOUSE]                                                                                                        | Q63886        |
| 271 | VQSNcSLSPQYLTDDK<br>TSAQVSLTEGHKFDR           | 75268 | von Willebrand factor A domain-containing protein 5A OS=Mus musculus GN=Vwa5a PE=1 SV=2 - [VMA5A_MOUSE]                                                                                   | Q99KC8        |
| 272 | LDPcTnTTAPSNYLNN<br>PYVR                      | 75389 | Lysosomal protective protein OS=Mus musculus GN=Ctsa PE=1 SV=1 - [PPGB_MOUSE]                                                                                                             | P16675        |
| 273 | GALMANFLTQGVccN<br>GTR                        | 53627 | 4-trimethylaminobutyraldehyde dehydrogenase OS=Mus musculus GN=Aldh9a1 PE=1 SV=1 - [AL9A1_MOUSE]                                                                                          | Q9JLJ2        |
| 274 | LGHILVDEADKAPT<br>VTcILK                      | 76008 | von Willebrand factor A domain-containing protein 8 OS=Mus musculus GN=Vwa8 PE=1 SV=2 - [VWA8_MOUSE]                                                                                      | Q8CC88        |
| 275 | NSTLTFVTMSGELK                                | 76140 | Phenazine biosynthesis-like domain-containing protein 1 OS=Mus musculus GN=Pbld1 PE=1 SV=2 - [PBLD1_MOUSE]                                                                                | Q9DCG6        |
| 276 | ANATEFGLASGVFTR                               | 76205 | Cytosolic 10-formyltetrahydrofolate dehydrogenase OS=Mus musculus GN=Aldh1l1 PE=1 SV=1 - [AL1L1_MOUSE]                                                                                    | Q8R0Y6        |
| 277 | QGIQVLVSTSNVSSLEG<br>AR                       | 76207 | Fatty acid synthase OS=Mus musculus GN=Fasn PE=1 SV=2 - [FAS_MOUSE]                                                                                                                       | P19096        |
| 278 | VFIVPVGnHsnIPFSR                              | 76326 | Phospholipase D4 OS=Mus musculus GN=Pld4 PE=1 SV=1 - [PLD4_MOUSE]                                                                                                                         | Q8BG07        |

|     |                                    |       |                                                                                                                        |        |
|-----|------------------------------------|-------|------------------------------------------------------------------------------------------------------------------------|--------|
| 279 | FnVSLIYGR                          | 76436 | Complement factor I OS=Mus musculus GN=Cfi PE=1 SV=3 - [CFAI_MOUSE]                                                    | Q61129 |
| 280 | VNVTVDYIRPASPATE<br>TVPAFSESR      | 76624 | Staphylococcal nuclease domain-containing protein 1 OS=Mus musculus GN=Snd1 PE=1 SV=1 - [SND1_MOUSE]                   | Q78PY7 |
| 281 | DTNGSqFFITTVK                      | 76633 | Peptidyl-prolyl cis-trans isomerase B OS=Mus musculus GN=Ppib PE=1 SV=2 - [PPIB_MOUSE]                                 | P24369 |
| 282 | IVGAPMHDLLLNNA<br>TVTTcHSK         | 76767 | C-1-tetrahydrofolate synthase, cytoplasmic OS=Mus musculus GN=Mthfd1 PE=1 SV=4 - [C1TC_MOUSE]                          | Q922D8 |
| 283 | ILMTSSASGIYGNFGQA<br>NYSAAK        | 77618 | Peroxisomal multifunctional enzyme type 2 OS=Mus musculus GN=Hsd17b4 PE=1 SV=3 - [DHB4_MOUSE]                          | P51660 |
| 284 | LVSPGSANETSILVES<br>VTR            | 78099 | Filamin-B OS=Mus musculus GN=Flnb PE=1 SV=3 - [FLNB_MOUSE]                                                             | Q80X90 |
| 285 | TVAnLSGcEATDSEALI<br>HcLR          | 78310 | Pyrethroid hydrolase Ces2a OS=Mus musculus GN=Ces2a PE=1 SV=1 - [EST2A_MOUSE]                                          | Q8QZR3 |
| 286 | GAPGVSDMNITYMSP<br>AK              | 67334 | Acyl-coenzyme A thioesterase 13 OS=Mus musculus GN=Acot13 PE=1 SV=1 - [ACO13_MOUSE]                                    | Q9CQR4 |
| 287 | ATEIGGILVNTPEDPNL<br>SK            | 78885 | Bifunctional epoxide hydrolase 2 OS=Mus musculus GN=Ephx2 PE=1 SV=2 - [HYES_MOUSE]                                     | P34914 |
| 288 | NAVITVPAYFnDSQR                    | 69504 | Stress-70 protein, mitochondrial OS=Mus musculus GN=Hspa9 PE=1 SV=3 - [GRP75_MOUSE]                                    | P38647 |
| 289 | TnSSFIQGFVDHVK                     | 79760 | Prosaposin OS=Mus musculus GN=Psap PE=1 SV=2 - [SAP_MOUSE]                                                             | Q61207 |
| 290 | FQQLVqVALGTMAHc<br>QNLDR           | 8822  | Elongation factor Ts, mitochondrial OS=Mus musculus GN=Tsfm PE=1 SV=1 - [EFTS_MOUSE]                                   | Q9CZR8 |
| 291 | FSPLLYcQSQELPnGSV<br>K             | 80050 | Na(+)/H(+) exchange regulatory cofactor NHE-RF3 OS=Mus musculus GN=Pdzk1 PE=1 SV=1 - [NHRF3_MOUSE]                     | Q9JIL4 |
| 292 | EPYSGPTLFLGGnSTY<br>VQPSHHSEIR     | 80106 | Protein ABHD11 OS=Mus musculus GN=Abhd11 PE=1 SV=1 - [ABHDB_MOUSE]                                                     | Q8K4F5 |
| 293 | HSGNITFDEIVNIAR                    | 80369 | 60S ribosomal protein L12 OS=Mus musculus GN=Rpl12 PE=1 SV=2 - [RL12_MOUSE]                                            | P35979 |
| 294 | SAAFVTEngSTIRFEDD<br>LKLR          | 80449 | Kynurenine/alpha-aminoadipate aminotransferase, mitochondrial OS=Mus musculus GN=Aadat PE=1 SV=1 - [AADAT_MOUSE]       | Q9WVM8 |
| 295 | KnGGLGHMNITLLSDIT<br>K             | 80690 | Thioredoxin-dependent peroxide reductase, mitochondrial OS=Mus musculus GN=Prdx3 PE=1 SV=1 - [PRDX3_MOUSE]             | P20108 |
| 296 | SLTQGSILVGNLAPVnG<br>TSQGK         | 81099 | Basement membrane-specific heparan sulfate proteoglycan core protein OS=Mus musculus GN=Hspg2 PE=1 SV=1 - [PGBM_MOUSE] | Q05793 |
| 297 | GGNASNScTVLSLLGA                   | 81148 | Ketohexokinase OS=Mus musculus GN=Khk PE=1 SV=1 - [KHK_MOUSE]                                                          | P97328 |
| 298 | YVRPGGGFEPNFTLFE                   | 81365 | Glutathione peroxidase 1 OS=Mus musculus GN=Gpx1 PE=1 SV=2 - [GPX1_MOUSE]                                              | P11352 |
| 299 | KIEDNNTLVFIVDVK                    | 81640 | 60S ribosomal protein L23a OS=Mus musculus GN=Rpl23a PE=1 SV=1 - [RL23A_MOUSE]                                         | P62751 |
| 300 | QAGIAQLYGIAGSTNV<br>TGDQVK         | 81644 | Fructose-1,6-bisphosphatase 1 OS=Mus musculus GN=Fbp1 PE=1 SV=3 - [F16P1_MOUSE]                                        | Q9QXD6 |
| 301 | STELDKELAnDLFNcSR                  | 81977 | Uridine phosphorylase 2 OS=Mus musculus GN=Upp2 PE=2 SV=1 - [UPP2_MOUSE]                                               | Q8CGR7 |
| 302 | YESAYGTQFTPCQLLLD<br>HANNSSK       | 82277 | Trifunctional enzyme subunit alpha, mitochondrial OS=Mus musculus GN=Hadha PE=1 SV=1 - [ECHA_MOUSE]                    | Q8BMS1 |
| 303 | QVIEAFNAScLSYVPEK                  | 82539 | Histidine ammonia-lyase OS=Mus musculus GN=Hal PE=1 SV=1 - [HUTH_MOUSE]                                                | P35492 |
| 304 | IENISnLHQQLMLELGS<br>NR            | 82764 | Protein phosphatase 1 regulatory subunit 7 OS=Mus musculus GN=Ppp1r7 PE=1 SV=2 - [PPIR7_MOUSE]                         | Q3UM45 |
| 305 | TnSSFIQGFVDHVKEDc<br>DR            | 82837 | Prosaposin OS=Mus musculus GN=Psap PE=1 SV=2 - [SAP_MOUSE]                                                             | Q61207 |
| 306 | NGSYDIGMAcGVESMT<br>LSQR           | 82847 | 3-ketoacyl-CoA thiolase B, peroxisomal OS=Mus musculus GN=Acaa1b PE=1 SV=1 - [THIKB_MOUSE]                             | Q8VCH0 |
| 307 | VANDSAPEHALRPGFL<br>STFALATDQGSK   | 83144 | Ragulator complex protein LAMTOR3 OS=Mus musculus GN=Lamtor3 PE=1 SV=1 - [LTOR3_MOUSE]                                 | O88653 |
| 308 | DGSIDLVINLPNNNTK                   | 83186 | Carbamoyl-phosphate synthase [ammonia], mitochondrial OS=Mus musculus GN=Cps1 PE=1 SV=2 - [CPSM_MOUSE]                 | Q8C196 |
| 309 | nGScGVSYIAQEPGNYE<br>VSIK          | 83722 | Filamin-B OS=Mus musculus GN=Flnb PE=1 SV=3 - [FLNB_MOUSE]                                                             | Q80X90 |
| 310 | NFSEETLQQLNQLNSc<br>HQEAVLK        | 83882 | COMM domain-containing protein 8 OS=Mus musculus GN=Commd8 PE=1 SV=1 - [COMD8_MOUSE]                                   | Q9CZG3 |
| 311 | DHGDALFVDVDPNDSSF<br>QIVKNPR       | 84292 | Arginase-1 OS=Mus musculus GN=Arg1 PE=1 SV=1 - [ARG1_MOUSE]                                                            | Q61176 |
| 312 | TSIDAYDNFDNISLAQR                  | 84570 | Clathrin heavy chain 1 OS=Mus musculus GN=Cltc PE=1 SV=3 - [CLH1_MOUSE]                                                | Q68FD5 |
| 313 | NASnPLAHYDDTAEIIL<br>qQcDGK        | 84946 | Cystathionine beta-synthase OS=Mus musculus GN=Cbs PE=1 SV=3 - [CBS_MOUSE]                                             | Q91WT9 |
| 314 | ALYLIATnGTPELQNPE<br>K             | 85042 | Serine/threonine-protein kinase PAK 2 OS=Mus musculus GN=Pak2 PE=1 SV=1 - [PAK2_MOUSE]                                 | Q8CIN4 |
| 315 | AVWGASGELVcTKPIPe<br>qPTHFWNDEnGSK | 78829 | Acetoacetyl-CoA synthetase OS=Mus musculus GN=Aacs PE=1 SV=1 - [AACS_MOUSE]                                            | Q9D2R0 |
| 316 | YTGnASALLILPDQGR                   | 85621 | Serine protease inhibitor A3K OS=Mus musculus GN=Serpina3k PE=1 SV=2 - [SPA3K_MOUSE]                                   | P07759 |
| 317 | QLITEEKIPnNTQWITW<br>SPEGHK        | 85998 | Dipeptidyl peptidase 4 OS=Mus musculus GN=Dpp4 PE=1 SV=3 - [DPP4_MOUSE]                                                | P28843 |
| 318 | KGPGMENPVAVTIFFG<br>ANDSSLKDENPK   | 60753 | Isoamyl acetate-hydrolyzing esterase 1 homolog OS=Mus musculus GN=lah1 PE=1 SV=1 - [IAH1_MOUSE]                        | Q9DB29 |
| 319 | GHLDNISNLLIGAIInIE<br>nGKANSVR     | 87316 | Aconitate hydratase, mitochondrial OS=Mus musculus GN=Aco2 PE=1 SV=1 - [ACON_MOUSE]                                    | Q99K10 |
| 320 | VIGNQSLVNELTFSAR                   | 2151  | Delta(3,5)-Delta(2,4)-dienoyl-CoA isomerase, mitochondrial OS=Mus musculus GN=Ech1 PE=1 SV=1 - [ECH1_MOUSE]            | O35459 |
| 321 | AnDTTFGLAAGVFTR                    | 76206 | 4-trimethylaminobutyraldehyde dehydrogenase OS=Mus musculus GN=Aldh9a1 PE=1 SV=1 - [AL9A1_MOUSE]                       | Q9JLJ2 |
| 322 | IYHPNINSnGSILDLIR                  | 88116 | Ubiquitin-conjugating enzyme E2 D3 OS=Mus musculus GN=Ube2d3 PE=1 SV=1 - [UB2D3_MOUSE]                                 | P61079 |
| 323 | SNKTLSiDSIGIMTKA<br>DLVnNLGTIAR    | 88086 | Heat shock protein 90-1 OS=Arabidopsis thaliana GN=HSP90-1 PE=1 SV=3 - [HS901_ARATH]                                   | P27323 |

|     |                                                          |       |                                                                                                                                                                                                                                                                                                                                                                                                                                                                                                                                                                                                                     |                 |
|-----|----------------------------------------------------------|-------|---------------------------------------------------------------------------------------------------------------------------------------------------------------------------------------------------------------------------------------------------------------------------------------------------------------------------------------------------------------------------------------------------------------------------------------------------------------------------------------------------------------------------------------------------------------------------------------------------------------------|-----------------|
| 324 | IGcFALSEPGNGSDAGA<br>ASTTAREEGDSWVLnG<br>TK              | 89263 | Short-chain specific acyl-CoA dehydrogenase, mitochondrial OS=Mus musculus GN=Acads PE=1 SV=2 - [ACADS_MOUSE]                                                                                                                                                                                                                                                                                                                                                                                                                                                                                                       | Q07417          |
| 325 | FLWFPHSENVSIYQDH<br>TNK                                  | 89265 | L-gulonolactone oxidase OS=Mus musculus GN=Gulo PE=1 SV=3 - [GGLO_MOUSE]                                                                                                                                                                                                                                                                                                                                                                                                                                                                                                                                            | P58710          |
| 326 | EYIPTVFDNYSAQSAV<br>DGR                                  | 89462 | Rho-related GTP-binding protein RhoG OS=Mus musculus GN=Rhog PE=1 SV=1 - [RHOG_MOUSE]                                                                                                                                                                                                                                                                                                                                                                                                                                                                                                                               | P84096          |
| 327 | TVEEVLGHFGVNESTG<br>LSLEQVKK                             | 89550 | Sarcoplasmic/endoplasmic reticulum calcium ATPase 2 OS=Mus musculus GN=Atp2a2 PE=1 SV=2 - [AT2A2_MOUSE]                                                                                                                                                                                                                                                                                                                                                                                                                                                                                                             | O55143          |
| 328 | NLTNPNTVILIGNK                                           | 89942 | Ras-related protein Rab-14 OS=Mus musculus GN=Rab14 PE=1 SV=3 - [RAB14_MOUSE]                                                                                                                                                                                                                                                                                                                                                                                                                                                                                                                                       | Q91V41          |
| 329 | TcPLDEFQcnNTLcKPLA<br>WK                                 | 89944 | Prolow-density lipoprotein receptor-related protein 1 OS=Mus musculus GN=Lrp1 PE=1 SV=1 - [LRP1_MOUSE]                                                                                                                                                                                                                                                                                                                                                                                                                                                                                                              | Q91ZX7          |
| 330 | EQPEKEPELqqYVPQLQ<br>NNTILR                              | 89985 | Eukaryotic translation initiation factor 3 subunit A OS=Mus musculus GN=Eif3a PE=1 SV=5 - [EIF3A_MOUSE]                                                                                                                                                                                                                                                                                                                                                                                                                                                                                                             | P23116          |
| 331 | FAAEHTIFASNTSSLQIT<br>NIANATTR                           | 90390 | Hydroxyacyl-coenzyme A dehydrogenase, mitochondrial OS=Mus musculus GN=Hadh PE=1 SV=2 - [HCDH_MOUSE]                                                                                                                                                                                                                                                                                                                                                                                                                                                                                                                | Q61425          |
| 332 | LDKFAAEHTIFASNTSS<br>LQITNIANATTR                        | 89464 | Hydroxyacyl-coenzyme A dehydrogenase, mitochondrial OS=Mus musculus GN=Hadh PE=1 SV=2 - [HCDH_MOUSE]                                                                                                                                                                                                                                                                                                                                                                                                                                                                                                                | Q61425          |
| 333 | LDNASAFQGAVISPHY<br>DSSLVK                               | 90884 | Pyruvate carboxylase, mitochondrial OS=Mus musculus GN=Pc PE=1 SV=1 - [PYC_MOUSE]                                                                                                                                                                                                                                                                                                                                                                                                                                                                                                                                   | Q05920          |
| 334 | DVFLPKPSWGnHTPIFR                                        | 90919 | Aspartate aminotransferase, mitochondrial OS=Mus musculus GN=Got2 PE=1 SV=1 - [AATM_MOUSE]                                                                                                                                                                                                                                                                                                                                                                                                                                                                                                                          | P05202          |
| 335 | ELDPTNMTYITNQAAV<br>HFEK                                 | 90934 | Stress-induced-phosphoprotein 1 OS=Mus musculus GN=Stip1 PE=1 SV=1 - [STIP1_MOUSE]                                                                                                                                                                                                                                                                                                                                                                                                                                                                                                                                  | Q60864          |
| 336 | IGNFTIQNVFPQSDGDS<br>SK                                  | 91265 | Heat shock 70 kDa protein 4L OS=Mus musculus GN=Hspa4l PE=1 SV=2 - [HS74L_MOUSE]                                                                                                                                                                                                                                                                                                                                                                                                                                                                                                                                    | P48722          |
| 337 | DDYRPTWTLnQTEPVA<br>GNYYPVNTR                            | 92617 | Lysosomal alpha-mannosidase OS=Mus musculus GN=Man2b1 PE=1 SV=4 - [MA2B1_MOUSE]                                                                                                                                                                                                                                                                                                                                                                                                                                                                                                                                     | O09159          |
| 338 | TVWVDYHNITQVVAV<br>GGR                                   | 92777 | Pyruvate kinase PKLR OS=Mus musculus GN=Pklr PE=1 SV=1 - [KPYR_MOUSE]                                                                                                                                                                                                                                                                                                                                                                                                                                                                                                                                               | P53657          |
| 339 | EADIQNFTSFISK                                            | 92795 | Enoyl-CoA delta isomerase 1, mitochondrial OS=Mus musculus GN=Eci1 PE=1 SV=2 - [EC1_MOUSE]                                                                                                                                                                                                                                                                                                                                                                                                                                                                                                                          | P42125          |
| 340 | ALAGLVYnSSGTEPcY<br>DIYR                                 | 92890 | Dipeptidyl peptidase 2 OS=Mus musculus GN=Dpp7 PE=1 SV=2 - [DPP2_MOUSE]                                                                                                                                                                                                                                                                                                                                                                                                                                                                                                                                             | Q9ET22          |
| 341 | RLVcLTVATDDVDPEG<br>nESIWYK                              | 93019 | Dimethylglycine dehydrogenase, mitochondrial OS=Mus musculus GN=Dmgdh PE=1 SV=1 - [M2GD_MOUSE]                                                                                                                                                                                                                                                                                                                                                                                                                                                                                                                      | Q9DBT9          |
| 342 | TDDEVVQREEEAIQLD<br>GLNASQIR                             | 93129 | Endoplasmic reticulum protein OS=Mus musculus GN=Hsp90b1 PE=1 SV=2 - [ENPL_MOUSE]                                                                                                                                                                                                                                                                                                                                                                                                                                                                                                                                   | P08113          |
| 343 | EYDLIVHQLATYPDVN<br>NSIK                                 | 93198 | Vacuolar protein sorting-associated protein 26A OS=Mus musculus GN=Vps26a PE=1 SV=1 - [VP26A_MOUSE]                                                                                                                                                                                                                                                                                                                                                                                                                                                                                                                 | P40336          |
| 344 | NSSAQAFGLPENPEEP<br>YLDGINYNcVAPGKR<br>SNNTSKPSHSDAHTA   | 93425 | Structural maintenance of chromosomes protein 1A OS=Mus musculus GN=Smc1a PE=1 SV=4 - [SMC1A_MOUSE]                                                                                                                                                                                                                                                                                                                                                                                                                                                                                                                 | Q9CU62          |
| 345 | EVNcLSFNYPSEFILAT<br>GSADK                               | 93515 | Histone-binding protein RBBP4 OS=Mus musculus GN=Rbbp4 PE=1 SV=5 - [RBBP4_MOUSE]                                                                                                                                                                                                                                                                                                                                                                                                                                                                                                                                    | Q60972          |
| 346 | IMDQAITVVGAPVIGLND<br>SGGAR                              | 94004 | Propionyl-CoA carboxylase beta chain, mitochondrial OS=Mus musculus GN=Pccb PE=1 SV=2 - [PCCB_MOUSE]                                                                                                                                                                                                                                                                                                                                                                                                                                                                                                                | Q99MN9          |
| 347 | DLDEVLQTHSVFVNVS                                         | 94482 | Ribosome maturation protein SBDS OS=Mus musculus GN=Sbds PE=1 SV=4 - [SBDS_MOUSE]                                                                                                                                                                                                                                                                                                                                                                                                                                                                                                                                   | P70122          |
| 348 | ITAIInTLPHLPPGTI<br>VYK                                  | 94760 | Beta-glucuronidase OS=Mus musculus GN=Gusb PE=1 SV=2 - [BGLR_MOUSE]                                                                                                                                                                                                                                                                                                                                                                                                                                                                                                                                                 | P12265          |
| 349 | LRPHFLSVcDPDFSqInC<br>SEGYIqNYR                          | 90909 | Phospholipid phosphatase 3 OS=Mus musculus GN=Plpp3 PE=1 SV=1 - [PLPP3_MOUSE]                                                                                                                                                                                                                                                                                                                                                                                                                                                                                                                                       | Q99JY8          |
| 350 | GDTHTQILEGLQFnLTQ<br>TSEADIHK                            | 95226 | Alpha-1-antitrypsin 1-1 OS=Mus musculus GN=Serpina1a PE=1 SV=4 - [A1AT1_MOUSE] Alpha-1-antitrypsin 1-2 OS=Mus musculus GN=Serpina1b PE=1 SV=2 - [A1AT2_MOUSE] Alpha-1-antitrypsin 1-3 OS=Mus musculus GN=Serpina1c PE=1 SV=2 - [A1AT3_MOUSE] Alpha-1-antitrypsin 1-4 OS=Mus musculus GN=Serpina1d PE=1 SV=1 - [A1AT4_MOUSE]                                                                                                                                                                                                                                                                                         | P07758;Q00897   |
| 351 | LSqNASLGPVHRPLPLq<br>YEDKEVEPGTLcDVAG<br>WGVVTHAGR       | 95732 | Complement factor D OS=Mus musculus GN=Cfd PE=1 SV=1 - [CFAD_MOUSE]                                                                                                                                                                                                                                                                                                                                                                                                                                                                                                                                                 | P03953          |
| 352 | MNYSDAIEWLKEHDV<br>K                                     | 95784 | Asparagine--tRNA ligase, cytoplasmic OS=Mus musculus GN=Nars PE=1 SV=2 - [SYNC_MOUSE]                                                                                                                                                                                                                                                                                                                                                                                                                                                                                                                               | Q8BP47          |
| 353 | KFPVPFqKENVTATLV<br>ELGR                                 | 95799 | UDP-glucuronosyltransferase 1-1 OS=Mus musculus GN=Ugt1a1 PE=1 SV=2 - [UD11_MOUSE]                                                                                                                                                                                                                                                                                                                                                                                                                                                                                                                                  | Q63886          |
| 354 | NASDMIDKLLTLFNR                                          | 96629 | ATP synthase subunit gamma, mitochondrial OS=Mus musculus GN=Atp5c1 PE=1 SV=1 - [ATPG_MOUSE]                                                                                                                                                                                                                                                                                                                                                                                                                                                                                                                        | Q91VR2          |
| 355 | NSSYFVEWIPNNVK                                           | 96688 | Tubulin beta-5 chain OS=Mus musculus GN=Tubb5 PE=1 SV=1 - [TBB5_MOUSE] Tubulin beta-9 chain OS=Arabidopsis thaliana GN=TUBB9 PE=1 SV=1 - [TBB9_ARATH] Tubulin beta-4 chain OS=Arabidopsis thaliana GN=TUBB4 PE=2 SV=2 - [TBB4_ARATH] Tubulin beta-2A chain OS=Mus musculus GN=Tubb2a PE=1 SV=1 - [TBB2A_MOUSE] Tubulin beta-2B chain OS=Mus musculus GN=Tubb2b PE=1 SV=1 - [TBB2B_MOUSE] Tubulin beta-4A chain OS=Mus musculus GN=Tubb4a PE=1 SV=3 - [TBB4A_MOUSE] Tubulin beta-4B chain OS=Mus musculus GN=Tubb4b PE=1 SV=1 - [TBB4B_MOUSE] Tubulin beta-6 chain OS=Mus musculus GN=Tubb6 PE=1 SV=1 - [TBB6_MOUSE] | 517;P24636;Q7TM |
| 356 | GYLLTLnFTK                                               | 5140  | Lysosome-associated membrane glycoprotein 1 OS=Mus musculus GN=Lamp1 PE=1 SV=2 - [LAMP1_MOUSE]                                                                                                                                                                                                                                                                                                                                                                                                                                                                                                                      | P11438          |
| 357 | TcVQTLEGHAQNVScA<br>SFHPELPIITGSEDGTV<br>DGTVTAGNASGVSDG | 96872 | Coatomer subunit beta' OS=Mus musculus GN=Copb2 PE=1 SV=2 - [COPB2_MOUSE]                                                                                                                                                                                                                                                                                                                                                                                                                                                                                                                                           | O55029          |
| 358 | AGAVIIASEDAVK                                            | 97124 | 3-ketoacyl-CoA thiolase, mitochondrial OS=Mus musculus GN=Acaa2 PE=1 SV=3 - [THIM_MOUSE]                                                                                                                                                                                                                                                                                                                                                                                                                                                                                                                            | Q8BWT1          |



|     |                                                                |        |                                                                                                                                                                                                                                                                                                          |               |
|-----|----------------------------------------------------------------|--------|----------------------------------------------------------------------------------------------------------------------------------------------------------------------------------------------------------------------------------------------------------------------------------------------------------|---------------|
| 359 | LVLYLEHnLEKNSTKE<br>EILAALeK                                   | 97156  | Prosaposin OS=Mus musculus GN=Psap PE=1 SV=2 - [SAP_MOUSE]                                                                                                                                                                                                                                               | Q61207        |
| 360 | AQGLYETInVTIPAGIQT<br>DQK                                      | 98297  | DnaJ homolog subfamily A member 3, mitochondrial OS=Mus musculus GN=DnaJ3 PE=1 SV=1 - [DNJA3_MOUSE]                                                                                                                                                                                                      | Q99M87        |
| 361 | LIPHLEKPLQnFTLcFR                                              | 98437  | Serum amyloid P-component OS=Mus musculus GN=Apes PE=1 SV=2 - [SAMP_MOUSE]                                                                                                                                                                                                                               | P12246        |
| 362 | VcEDFGVIATFDPKPIP<br>GNWNGAGcHTNFSTK<br>GHISAGSNQTMVVSgA       | 98820  | Glutamine synthetase OS=Mus musculus GN=Glul PE=1 SV=6 - [GLNA_MOUSE][Glutamine synthetase OS=Acomys cahirinus GN=GLUL PE=2 SV=3 - [GLNA_ACOCA]                                                                                                                                                          | P15105        |
| 363 | AGAcGSLAGQIGHLLGc                                              | 98986  | Prostaglandin reductase 2 OS=Mus musculus GN=Ptgr2 PE=1 SV=2 - [PTGR2_MOUSE]                                                                                                                                                                                                                             | Q8VDQ1        |
| 364 | VETGVLKPGMVVTFAP<br>VNVTTVEVK                                  | 99327  | Elongation factor 1-alpha 1 OS=Homo sapiens GN=EEF1A1 PE=1 SV=1 - [EF1A1_HUMAN][Elongation factor 1-alpha 1 OS=Mus musculus GN=Eef1a1 PE=1 SV=3 - [EF1A1_MOUSE]                                                                                                                                          | P68104;P10126 |
| 365 | EGGPNPENSSLANILE<br>LcR                                        | 99803  | Translational activator of cytochrome c oxidase 1 OS=Mus musculus GN=Taco1 PE=1 SV=1 - [TACO1_MOUSE]                                                                                                                                                                                                     | Q8K0Z7        |
| 366 | DHGDLAFVDVPNDSSF<br>QIVK                                       | 99930  | Arginase-1 OS=Mus musculus GN=Arg1 PE=1 SV=1 - [ARG1_MOUSE]                                                                                                                                                                                                                                              | Q61176        |
| 367 | NVnISYIVnDSFFPQRPE                                             | 100371 | Carboxylesterase 3B OS=Mus musculus GN=Ces3b PE=1 SV=2 - [EST3B_MOUSE]                                                                                                                                                                                                                                   | Q8VCU1        |
| 368 | KISELDAFLKEPALNEA<br>NLSNLK                                    | 90641  | Proteasome activator complex subunit 1 OS=Mus musculus GN=Psm1 PE=1 SV=2 - [PSME1_MOUSE]                                                                                                                                                                                                                 | P97371        |
| 369 | IcDFSNAASKPQTIQESTG<br>GIVEVLHKVDSEGISPN<br>AFnISpNDTSSGcGINL  | 100515 | Peroxisomal multifunctional enzyme type 2 OS=Mus musculus GN=Hsd17b4 PE=1 SV=3 - [DHB4_MOUSE]                                                                                                                                                                                                            | P51660        |
| 370 | VTLK                                                           | 100532 | Lysosome-associated membrane glycoprotein 1 OS=Mus musculus GN=Lamp1 PE=1 SV=2 - [LAMP1_MOUSE]                                                                                                                                                                                                           | P11438        |
| 371 | SLGPnTcSSnGSSLYFIH<br>GPnLYcYSSIDKLNA                          | 100788 | Hemopexin OS=Mus musculus GN=Hpx PE=1 SV=2 - [HEMO_MOUSE]                                                                                                                                                                                                                                                | Q91X72        |
| 372 | LNEHFLNTTDFLDTIK                                               | 101048 | Isocitrate dehydrogenase [NADP], mitochondrial OS=Mus musculus GN=Idh2 PE=1 SV=3 - [IDHP_MOUSE]                                                                                                                                                                                                          | P54071        |
| 373 | EVMNLLQLnVTK                                                   | 101191 | Carboxypeptidase Q OS=Mus musculus GN=Cpq PE=1 SV=1 - [CBPQ_MOUSE]                                                                                                                                                                                                                                       | Q9WVJ3        |
| 374 | GHLNDNISNLLIGAnIE<br>nGK                                       | 101550 | Aconitate hydratase, mitochondrial OS=Mus musculus GN=Aco2 PE=1 SV=1 - [ACON_MOUSE]                                                                                                                                                                                                                      | Q99K10        |
| 375 | NLLGYynqSAGGSHTLq<br>QMSGcDLGSDWR                              | 101751 | H-2 class I histocompatibility antigen, D-B alpha chain OS=Mus musculus GN=H2-D1 PE=1 SV=2 - [HA11_MOUSE]                                                                                                                                                                                                | P01899        |
| 376 | VGDFNESTYYMEGNL<br>GHPVFOTQFGR                                 | 101840 | Beta-ureidopropionase OS=Mus musculus GN=Upb1 PE=1 SV=1 - [BUP1_MOUSE]                                                                                                                                                                                                                                   | Q8VC97        |
| 377 | HPnGTQETILLnHTFNE<br>TQIEWFR                                   | 101931 | Aconitate hydratase, mitochondrial OS=Mus musculus GN=Aco2 PE=1 SV=1 - [ACON_MOUSE]                                                                                                                                                                                                                      | Q99K10        |
| 378 | EVAWNLTSDVLR                                                   | 101987 | Peroxisomal acyl-coenzyme A oxidase 1 OS=Homo sapiens GN=ACOX1 PE=1 SV=3 - [ACOX1_HUMAN][Peroxisomal acyl-coenzyme A oxidase 1 OS=Mus musculus GN=Acox1 PE=1 SV=5 - [ACOX1_MOUSE]                                                                                                                        | Q15067;Q9R0H0 |
| 379 | EVESVTPEHcIFASNTS<br>ALPINQIAAVSK                              | 102840 | Trifunctional enzyme subunit alpha, mitochondrial OS=Mus musculus GN=Hadha PE=1 SV=1 - [ECHA_MOUSE]                                                                                                                                                                                                      | Q8BMS1        |
| 380 | nLTSPVGVQPILnEHTFc<br>AGLTK                                    | 9658   | Haptoglobin OS=Mus musculus GN=Hp PE=1 SV=1 - [HPT_MOUSE]                                                                                                                                                                                                                                                | Q61646        |
| 381 | LGLVGNLSLDGVK                                                  | 103654 | ATP-citrate synthase OS=Mus musculus GN=Acly PE=1 SV=1 - [ACLY_MOUSE]                                                                                                                                                                                                                                    | Q91V92        |
| 382 | HVGPGVLSMANAGPN<br>TNGSgFFIcTIK                                | 103690 | Peptidyl-prolyl cis-trans isomerase F, mitochondrial OS=Mus musculus GN=Ppif PE=1 SV=1 - [PPIF_MOUSE]                                                                                                                                                                                                    | Q99KR7        |
| 383 | GANSSSGnPLVYLDVG<br>ADGQPLGR                                   | 104243 | Peptidyl-prolyl cis-trans isomerase F, mitochondrial OS=Mus musculus GN=Ppif PE=1 SV=1 - [PPIF_MOUSE]                                                                                                                                                                                                    | Q99KR7        |
| 384 | VYPETGYInYDQLEEnA<br>SLFHPK                                    | 104761 | Serine hydroxymethyltransferase, cytosolic OS=Mus musculus GN=Shmt1 PE=1 SV=3 - [GLYC_MOUSE]                                                                                                                                                                                                             | P50431        |
| 385 | NVSFcVnKGEILGLLGP<br>DGAGK                                     | 104765 | ATP-binding cassette sub-family A member 6 OS=Mus musculus GN=Abca6 PE=1 SV=2 - [ABCA6_MOUSE]                                                                                                                                                                                                            | Q8K441        |
| 386 | EYqLNDSSAAYLNDLE<br>R                                          | 105092 | Guanine nucleotide-binding protein G(i) subunit alpha-2 OS=Mus musculus GN=Gnai2 PE=1 SV=5 - [GNAI2_MOUSE]                                                                                                                                                                                               | P08752        |
| 387 | FKLDWLnGcSGLnDDSY<br>GYR                                       | 105342 | Sodium/potassium-transporting ATPase subunit beta-1 OS=Mus musculus GN=Atp1b1 PE=1 SV=1 - [AT1B1_MOUSE]                                                                                                                                                                                                  | P14094        |
| 388 | NISSHnIIFSNGELDPW<br>SGGGVTR                                   | 105522 | Lysosomal Pro-X carboxypeptidase OS=Mus musculus GN=Prpc PE=1 SV=2 - [PCP_MOUSE]                                                                                                                                                                                                                         | Q7TMR0        |
| 389 | YEPIPFASmESTPTGI<br>TDHIAQGPENLEESPK<br>IAnFSQcTLYSgDDL        | 105936 | OCIA domain-containing protein 1 OS=Mus musculus GN=Ociad1 PE=1 SV=1 - [OCAD1_MOUSE]                                                                                                                                                                                                                     | Q9CRD0        |
| 390 | EALPKPcPcPR                                                    | 106786 | Kininogen-1 OS=Mus musculus GN=Kng1 PE=1 SV=1 - [KNG1_MOUSE]                                                                                                                                                                                                                                             | O08677        |
| 391 | ASQQLSnETSSFGFNLL<br>R                                         | 106997 | Protein Z-dependent protease inhibitor OS=Mus musculus GN=Serpina10 PE=1 SV=1 - [ZPI_MOUSE]                                                                                                                                                                                                              | Q8R121        |
| 392 | AVcMLSNTTAAIAEAWA<br>R                                         | 107505 | Tubulin alpha-1B chain OS=Mus musculus GN=Tuba1b PE=1 SV=2 - [TBA1B_MOUSE][Tubulin alpha-4A chain OS=Mus musculus GN=Tuba4a PE=1 SV=1 - [TBA4A_MOUSE][Tubulin alpha-1C chain OS=Mus musculus GN=Tuba1c PE=1 SV=1 - [TBA1C_MOUSE][Tubulin alpha chain OS=Xenopus laevis GN=tuba PE=2 SV=2 - [TBB4A_MOUSE] | P68368;P68373 |
| 393 | mAATFIGNSTAIQELFK                                              | 107557 | Tubulin beta-4A chain OS=Mus musculus GN=Tubb4a PE=1 SV=3 - [TBB4A_MOUSE]                                                                                                                                                                                                                                |               |
| 394 | MSATFIGNSTAIQELFK<br>R                                         | 107558 | Tubulin beta-2A chain OS=Mus musculus GN=Tubb2a PE=1 SV=1 - [TBB2A_MOUSE][Tubulin beta-2B chain OS=Mus musculus GN=Tubb2b PE=1 SV=1 - [TBB2B_MOUSE][Tubulin beta-4B chain OS=Mus musculus GN=Tubb4b PE=1 SV=1 - [TBB4B_MOUSE]                                                                            | Q7TMM9;P68372 |
| 395 | TILSNqTVDIPENVEITL<br>KLGEScIFAPANVTSEK<br>EQAAALTLAK          | 107981 | 60S ribosomal protein L9 OS=Mus musculus GN=Rpl9 PE=2 SV=2 - [RL9_MOUSE]                                                                                                                                                                                                                                 | P51410        |
| 396 | IEQAAALTLAK                                                    | 108250 | 3-hydroxyacyl-CoA dehydrogenase type-2 OS=Mus musculus GN=Hsd17b10 PE=1 SV=4 - [HCD2_MOUSE]                                                                                                                                                                                                              | O08756        |
| 397 | IEQAVDGNWTLPLVcIEE                                             | 108260 | Complement factor H OS=Mus musculus GN=Cfh PE=1 SV=2 - [CFAH_MOUSE]                                                                                                                                                                                                                                      | P06909        |
| 398 | EAAHSVTEQAIQYGTE<br>DnSTAVVVPFGAWGK<br>VYGGIVnQSEINEGTAF<br>FR | 108772 | Protein phosphatase 1K, mitochondrial OS=Mus musculus GN=Ppm1k PE=1 SV=1 - [PPM1K_MOUSE]                                                                                                                                                                                                                 | Q8BXN7        |
| 399 |                                                                | 108808 | Coagulation factor XI OS=Mus musculus GN=F11 PE=2 SV=2 - [FA11_MOUSE]                                                                                                                                                                                                                                    | Q91Y47        |

|     |                                                     |        |                                                                                                                                                   |               |
|-----|-----------------------------------------------------|--------|---------------------------------------------------------------------------------------------------------------------------------------------------|---------------|
| 400 | QQWITPFTnGDKIGcFALSEPGNSDAGAASTTYVASYLLAALGGNSSPSAK | 110176 | Short-chain specific acyl-CoA dehydrogenase, mitochondrial OS=Mus musculus GN=Acads PE=1 SV=2 - [ACADS_MOUSE]                                     | Q07417        |
| 401 | VAGLLVLNYSNDYnH WLATK                               | 110429 | 60S acidic ribosomal protein P2 OS=Mus musculus GN=Rplp2 PE=1 SV=3 - [RLA2_MOUSE]                                                                 | P99027        |
| 402 | nTTSYPPmcSQDAVGGQVLSELFTRNK                         | 110714 | Carbamoyl-phosphate synthase [ammonia], mitochondrial OS=Mus musculus GN=Cps1 PE=1 SV=2 - [CPSM_MOUSE]                                            | Q8C196        |
| 403 | TnSSFIOGFVDHVKEDcDRLGPGVSDIcK                       | 111551 | Carboxylesterase 1D OS=Mus musculus GN=Ces1d PE=1 SV=1 - [CES1D_MOUSE]                                                                            | Q8VCT4        |
| 404 | NTQADVINASWSVLSnSTR                                 | 111933 | Prosaposin OS=Mus musculus GN=Psap PE=1 SV=2 - [SAP_MOUSE]                                                                                        | Q61207        |
| 405 | AYLPVNESFGFTADLR TLGISPFHEFADVVFTANDSGHR            | 112603 | Tetraspanin-31 OS=Mus musculus GN=Tspan31 PE=1 SV=1 - [TSN31_MOUSE]                                                                               | Q9CQ88        |
| 406 | VAAELQAGTcYINnYN VSPVELPFGGYKK                      | 112758 | Elongation factor 2 OS=Mus musculus GN=Eef2 PE=1 SV=2 - [EF2_MOUSE]                                                                               | P58252        |
| 407 | SLGEVnFTATAEALQSP ELcGNK                            | 113164 | Transthyretin OS=Mus musculus GN=Tr PE=1 SV=1 - [TTHY_MOUSE]                                                                                      | P07309        |
| 408 | SSNVLSEdQDSYLcNVT LFR                               | 113237 | 4-trimethylaminobutyraldehyde dehydrogenase OS=Mus musculus GN=Aldh9a1 PE=1 SV=1 - [AL9A1_MOUSE]                                                  | Q9JLJ2        |
| 409 | VQNTSLEAIVQnASSD NOGIQLSAVQAAR                      | 16060  | Pregnancy zone protein OS=Mus musculus GN=Pzp PE=1 SV=3 - [PZP_MOUSE]                                                                             | Q61838        |
| 410 | nGGLGHMNITLLSDITK LVcLTVATDDVDPEGN ESIWYK           | 113925 | V-type proton ATPase subunit C 1 OS=Mus musculus GN=Atp6v1c1 PE=1 SV=4 - [VATC1_MOUSE]                                                            | Q9Z1G3        |
| 411 | VLSLETsvSELSSQLNE SK                                | 114594 | Importin subunit alpha-3 OS=Mus musculus GN=Kpna4 PE=1 SV=1 - [IMA3_MOUSE]                                                                        | O35343        |
| 412 | TLLGDVpVVADPTVPN VTVTR                              | 115154 | Thioredoxin-dependent peroxide reductase, mitochondrial OS=Mus musculus GN=Prdx3 PE=1 SV=1 - [PRDX3_MOUSE]                                        | P20108        |
| 413 | SQLTISNLDVnVDPGTY VcnATNAQGTR                       | 114905 | Dimethylglycine dehydrogenase, mitochondrial OS=Mus musculus GN=Dmgdh PE=1 SV=1 - [M2GD_MOUSE]                                                    | Q9DBT9        |
| 414 | SIGPLTFVFTGTGNVSK                                   | 115742 | Early endosome antigen 1 OS=Mus musculus GN=Eea1 PE=1 SV=2 - [EEA1_MOUSE]                                                                         | Q8BL66        |
| 415 | EVDPLVYnMSHEDPGN VSYSEIGGLSEQIR                     | 116462 | Rho GDP-dissociation inhibitor 2 OS=Mus musculus GN=Arhgdib PE=1 SV=3 - [GDIR2_MOUSE]                                                             | Q61599        |
| 416 | ASNTSEVYFDGKVPVPS ENVLGEVGDGFK                      | 116609 | Basigin OS=Mus musculus GN=Bsg PE=1 SV=2 - [BASI_MOUSE]                                                                                           | P18572        |
| 417 | NTTVpCKKEqVFSTYA DNqPGVLIQVYEGER                    | 116676 | Alpha-aminoacidic semialdehyde synthase, mitochondrial OS=Mus musculus GN=Aass PE=1 SV=1 - [AASS_MOUSE]                                           | Q99K67        |
| 418 | VFNTPDDLHLHVIYD VSHNIAK                             | 116748 | 26S proteasome regulatory subunit 10B OS=Mus musculus GN=Psmc6 PE=1 SV=1 - [PRS10_MOUSE]                                                          | P62334        |
| 419 | GnLFMDINNKIANFSQ ScTLYSGDDLVEALPKP cPGcPR           | 117050 | Very long-chain specific acyl-CoA dehydrogenase, mitochondrial OS=Mus musculus GN=Acadv1 PE=1 SV=3 - [ACADV_MOUSE]                                | P50544        |
| 420 | VNDTIQIDLETGKITDFI K                                | 53804  | Heat shock 70 kDa protein 5 OS=Arabidopsis thaliana GN=HSP70-5 PE=2 SV=1 - [HSP7E_ARATH]                                                          | Q9S9N1        |
| 421 | ISDTnITAIPQGLPTSLTE VHLDGNK                         | 30780  | tRNA-splicing ligase RtcB homolog OS=Mus musculus GN=RtcB PE=1 SV=1 - [RTCB_MOUSE]                                                                | Q99LF4        |
| 422 | LDKDNLSYIEHIFEISR                                   | 117406 | Kininogen-1 OS=Mus musculus GN=Kng1 PE=1 SV=1 - [KNG1_MOUSE]                                                                                      | O08677        |
| 423 | HSGLcLETQNWPDsvN QPQFPALLRPGEeYN HTTWFK             | 117507 | 40S ribosomal protein S4, X isoform OS=Mus musculus GN=Rps4x PE=1 SV=2 - [RS4X_MOUSE]                                                             | P62702        |
| 424 | FTAPDTLFAAnGSVYPPn EGFcPcR                          | 117857 | Decorin OS=Mus musculus GN=Dcn PE=1 SV=1 - [PGS2_MOUSE]                                                                                           | P28654        |
| 425 | LVNWScTLNSAISDIEV DKK                               | 118149 | Astrocytic phosphoprotein PEA-15 OS=Homo sapiens GN=PEA15 PE=1 SV=2 - [PEA15_HUMAN]                                                               | Q15121        |
| 426 | GSILIPNMSSVLKDETV WEKPLR                            | 118432 | Aldose 1-epimerase OS=Mus musculus GN=Galm PE=1 SV=1 - [GALM_MOUSE]                                                                               | Q8K157        |
| 427 | TALVQEVHqNFSAWcS QVIR                               | 118691 | Scavenger receptor class B member 1 OS=Mus musculus GN=Scarb1 PE=1 SV=1 - [SCRIB1_MOUSE]                                                          | Q61009        |
| 428 | DLFTnqSDFADTTKDTPLTLTVLHK                           | 119658 | Valine--tRNA ligase OS=Mus musculus GN=Vars PE=1 SV=1 - [SYVC_MOUSE]                                                                              | Q9Z1Q9        |
| 429 | LYTDFDEIRQEIENETE FPVPFqKE nVTATLVEL GR             | 119722 | Cytochrome P450 2D10 OS=Mus musculus GN=Cyp2d10 PE=1 SV=2 - [CP2DA_MOUSE]                                                                         | P24456        |
| 430 | TAADATGLqPILNQFTP AnVSR                             | 119839 | Lysosomal alpha-mannosidase OS=Mus musculus GN=Man2b1 PE=1 SV=4 - [MA2B1_MOUSE]                                                                   | O09159        |
| 431 | VVELLADIVQnSSLEDS QIEKER                            | 120002 | Corticosteroid-binding globulin OS=Mus musculus GN=Serpina6 PE=1 SV=1 - [CBG_MOUSE]                                                               | Q06770        |
| 432 | ATLQAALcLEnFSSQVVER                                 | 120069 | Dynamin-1-like protein OS=Mus musculus GN=Dnm11 PE=1 SV=2 - [DNM1L_MOUSE]                                                                         | Q8K1M6        |
| 433 | SVNESLNNLFITEEDYQ ALR                               | 120713 | UDP-glucuronosyltransferase 1-1 OS=Mus musculus GN=Ugt1a1 PE=1 SV=2 - [UD11_MOUSE]                                                                | Q63886        |
| 434 | NLTDAFLAEIEK                                        | 120826 | Integrin alpha-V OS=Mus musculus GN=Itgav PE=1 SV=2 - [ITAV_MOUSE]                                                                                | P43406        |
| 435 | LTFNstLNTSGLVAqG EALPIPGAHRPGLVTK                   | 121035 | Cytochrome b-c1 complex subunit 1, mitochondrial OS=Mus musculus GN=Uqerc1 PE=1 SV=2 - [OCR1_MOUSE]                                               | Q9CZ13        |
| 436 |                                                     | 120733 | Actin-related protein 2/3 complex subunit 4 OS=Mus musculus GN=Arpc4 PE=1 SV=3 - [ARPC4_MOUSE]                                                    | P59999        |
| 437 |                                                     | 121144 | Clathrin heavy chain 1 OS=Mus musculus GN=Cltc PE=1 SV=3 - [CLH1_MOUSE]                                                                           | Q68FD5        |
| 438 |                                                     | 121293 | Cytochrome P450 2D9 OS=Mus musculus GN=Cyp2d9 PE=1 SV=2 - [CP2D9_MOUSE] Cytochrome P450 2D10 OS=Mus musculus GN=Cyp2d10 PE=1 SV=2 - [CP2DA_MOUSE] | P11714;P24456 |
| 439 |                                                     | 121453 | Cytosolic 10-formyltetrahydrofolate dehydrogenase OS=Mus musculus GN=Aldh1l1 PE=1 SV=1 - [AL1L1_MOUSE]                                            | Q8R0Y6        |

|     |                                                                  |        |                                                                                                                                                            |               |
|-----|------------------------------------------------------------------|--------|------------------------------------------------------------------------------------------------------------------------------------------------------------|---------------|
| 440 | MAVTFIGNSTAIQELFK                                                | 121788 | Tubulin beta-5 chain OS=Mus musculus GN=Tubb5 PE=1 SV=1 - [TBB5_MOUSE]                                                                                     | P99024        |
| 441 | GWLnGSLVGFYK                                                     | 122430 | Glutamyl aminopeptidase OS=Mus musculus GN=Enpep PE=1 SV=1 - [AMPE_MOUSE]                                                                                  | P16406        |
| 442 | LGVNNISGIEEVNMF<br>NQGTVIHFNNPK                                  | 122467 | Transcription factor BTF3 OS=Mus musculus GN=Btf3 PE=1 SV=3 - [BTF3_MOUSE]                                                                                 | Q64152        |
| 443 | FNISNGGPAPEAITDKIF<br>QISK                                       | 122604 | Phosphoglucomutase-1 OS=Mus musculus GN=Pgm1 PE=1 SV=4 - [PGM1_MOUSE]                                                                                      | Q9D0F9        |
| 444 | LADDVDLEQVAnETHG<br>HVGADLAAALcSEAAALQ<br>AIRK                   | 123035 | Transitional endoplasmic reticulum ATPase OS=Homo sapiens GN=VCP PE=1 SV=4 - [TERA_HUMAN]                                                                  | P55072        |
| 445 | ISELDAFLKEPALnEAN<br>LSNLK                                       | 123131 | Proteasome activator complex subunit 1 OS=Mus musculus GN=Psm1 PE=1 SV=2 - [PSME1_MOUSE]                                                                   | P97371        |
| 446 | SVYAHFPINVViqENGS<br>LVEIR                                       | 123645 | 60S ribosomal protein L9 OS=Mus musculus GN=Rpl9 PE=2 SV=2 - [RL9_MOUSE]                                                                                   | P51410        |
| 447 | LQNLDALNTLTVLSVQ<br>SNR                                          | 124234 | Protein phosphatase 1 regulatory subunit 7 OS=Mus musculus GN=Ppp1r7 PE=1 SV=2 - [PP1R7_MOUSE]                                                             | Q3UM45        |
| 448 | NLTQQLOTTcqTVLVN<br>AOGLPQNIQDQAK                                | 124341 | Perilipin-2 OS=Mus musculus GN=Plin2 PE=1 SV=2 - [PLIN2_MOUSE]                                                                                             | P43883        |
| 449 | NISFACnPGFFLnGTSSS<br>VncSDnEFTQALTAIAPP<br>ESLTR                | 124502 | Beta-2-glycoprotein 1 OS=Mus musculus GN=ApoH PE=1 SV=1 - [APOH_MOUSE]                                                                                     | Q01339        |
| 450 | KTGEAnLTqLYTQEAL<br>DFIQTOHAR                                    | 124727 | MICOS complex subunit Mic60 OS=Mus musculus GN=Immt PE=1 SV=1 - [MIC60_MOUSE]                                                                              | Q8CAQ8        |
| 451 | GcnIKGEDDSWDFGTG<br>AGFYVnATEDPWK                                | 87537  | N-acetylgalactosamine-6-sulfatase OS=Mus musculus GN=GalnS PE=1 SV=2 - [GALNS_MOUSE]                                                                       | Q571E4        |
| 452 | FDEFSSQcAPGYEKnS<br>TLcDlcIGPLK                                  | 124781 | S-formylglutathione hydrolase OS=Mus musculus GN=EsD PE=1 SV=1 - [ESTD_MOUSE]                                                                              | Q9R0P3        |
| 453 | qDPKPLPYLcHSqPYTF<br>DINLSVSLK                                   | 124866 | Serotransferrin OS=Mus musculus GN=Tf PE=1 SV=1 - [TRFE_MOUSE]                                                                                             | Q921I1        |
| 454 | INESIGGDLSSELPELH<br>ALTAGLK                                     | 125136 | Fumarylacetoacetase OS=Mus musculus GN=Fah PE=1 SV=2 - [FAAA_MOUSE]                                                                                        | P35505        |
| 455 | NLTDALAEIEKVK                                                    | 125313 | Peroxisomal acyl-coenzyme A oxidase 1 OS=Mus musculus GN=Acox1 PE=1 SV=5 - [ACOX1_MOUSE]                                                                   | Q9R0H0        |
| 456 | NFSAIINPPQAcILAIGAS<br>EDK                                       | 126261 | Cytochrome P450 2D10 OS=Mus musculus GN=Cyp2d10 PE=1 SV=2 - [CP2DA_MOUSE]                                                                                  | P24456        |
| 457 | GTTLIPNLSSVLKDETV<br>WEKPLR                                      | 126269 | Dihydroliopoyllysine-residue acetyltransferase component of pyruvate dehydrogenase complex, mitochondrial OS=Mus musculus GN=Dlat PE=1 SV=2 - [ODP2_MOUSE] | Q8BMF4        |
| 458 | QAIDDDcNQTGQMTA<br>GLLDWPqGTFASQVTL<br>EGDKYKVER                 | 126628 | Cytochrome P450 2D26 OS=Mus musculus GN=Cyp2d26 PE=1 SV=1 - [CP2DQ_MOUSE]                                                                                  | Q8CIM7        |
| 459 | QNYSTVEAAVNRLV<br>NLHLR                                          | 113159 | Electron transfer flavoprotein subunit beta OS=Mus musculus GN=Etfb PE=1 SV=3 - [ETFB_MOUSE]                                                               | Q9DCW4        |
| 460 | AIWNVINWENVTER                                                   | 127098 | Ferritin light chain 1 OS=Mus musculus GN=Ftl1 PE=1 SV=2 - [FRIL1_MOUSE]                                                                                   | P29391        |
| 461 | cNEIINWLDKNQTAEK<br>EEFEHQOK                                     | 127176 | Superoxide dismutase [Mn], mitochondrial OS=Mus musculus GN=Sod2 PE=1 SV=3 - [SODM_MOUSE]                                                                  | P09671        |
| 462 | SFDccGLFnLTTLR<br>WDHSqTWDVPAEDF                                 | 127230 | Heat shock cognate 71 kDa protein OS=Homo sapiens GN=HSPA8 PE=1 SV=1 - [HSP7C_HUMAN]                                                                       | P11142        |
| 463 | PnGSSSSATVYSIDASP<br>ESPDHYLYVDHcIDGR<br>TnGSSPLLVAAWGAcT<br>LTR | 127303 | Tetraspanin-31 OS=Mus musculus GN=Tspan31 PE=1 SV=1 - [TSN31_MOUSE]                                                                                        | Q9CQ88        |
| 464 | FcALNWENQSVFVLAm<br>VDEDKK                                       | 127530 | Fatty acid synthase OS=Mus musculus GN=Fasn PE=1 SV=2 - [FAS_MOUSE]                                                                                        | P19096        |
| 465 | LNATIELATVqPGqnF<br>HMFTKEELEEVK                                 | 127642 | ATP-dependent (S)-NAD(P)H-hydrate dehydratase OS=Mus musculus GN=Naxd PE=1 SV=1 - [NNRD_MOUSE]                                                             | Q9CZ42        |
| 466 | SSPSSLILAGGQcNESV<br>GYVVEPcIESK                                 | 127742 | Regucalcin OS=Mus musculus GN=Rgn PE=1 SV=1 - [RGN_MOUSE]                                                                                                  | Q64374        |
| 467 | TVVTEAGNLLKDNATq<br>EEILHYLEK                                    | 127889 | Proteasome subunit alpha type-5 OS=Mus musculus GN=Psm5 PE=1 SV=1 - [PSA5_MOUSE]                                                                           | Q9Z2U1        |
| 468 | GFFDPNTHENLTYLQL<br>LER                                          | 127945 | Delta-1-pyrroline-5-carboxylate dehydrogenase, mitochondrial OS=Mus musculus GN=Aldh4a1 PE=1 SV=3 - [AL4A1_MOUSE]                                          | Q8CHT0        |
| 469 | GFFDPNTHENLTYLQL<br>LqR                                          | 128196 | Prosaposin OS=Mus musculus GN=Psap PE=1 SV=2 - [SAP_MOUSE]                                                                                                 | Q61207        |
| 470 | IEPAqAVAEVEPLPEDY<br>YTRPVNLTEVTTLQOR                            | 128344 | Epiplakin OS=Mus musculus GN=Eppk1 PE=1 SV=2 - [EPIPL_MOUSE]]Plectin OS=Mus musculus GN=Plec PE=1 SV=3 - [PLEC_MOUSE]                                      | Q8R0W0;Q9QXS1 |
| 471 | YTSFEYPKnISFACnPGF<br>FLnGTSSSK                                  | 128345 | Epiplakin OS=Mus musculus GN=Eppk1 PE=1 SV=2 - [EPIPL_MOUSE]                                                                                               | Q8R0W0        |
| 472 | LVEDLESFLKPYSVEEq<br>KnLTScPDGAPFIQHGP<br>DYR                    | 128684 | Dynactin subunit 4 OS=Mus musculus GN=Dctn4 PE=1 SV=1 - [DCTN4_MOUSE]                                                                                      | Q8CBY8        |
| 473 | AVIGDHGDEIFSVFGSP<br>FLKDGASEEETNLK                              | 128753 | Beta-2-glycoprotein 1 OS=Mus musculus GN=ApoH PE=1 SV=1 - [APOH_MOUSE]                                                                                     | Q01339        |
| 474 | LQLEYcnLTATScEPLAS<br>VLR                                        | 128799 | Sodium/potassium-transporting ATPase subunit beta-3 OS=Mus musculus GN=Atp1b3 PE=1 SV=1 - [AT1B3_MOUSE]                                                    | P97370        |
| 475 | LnFLSPELPAVAEFSTnE<br>TMGHSADR                                   | 128982 | Carboxylesterase 1D OS=Mus musculus GN=Ces1d PE=1 SV=1 - [CES1D_MOUSE]                                                                                     | Q8VCT4        |
| 476 | NScISEEERDAYEELLT<br>qAEIOSNISTVNR                               | 129049 | Ribonuclease inhibitor OS=Mus musculus GN=Rnh1 PE=1 SV=1 - [RINI_MOUSE]                                                                                    | Q91V17        |
| 477 | YNLTPTIFFcATPPDDG<br>NLcR                                        | 130118 | Trifunctional enzyme subunit beta, mitochondrial OS=Mus musculus GN=Hadhb PE=1 SV=1 - [ECHB_MOUSE]                                                         | Q99JY0        |
| 478 | AVNAcGIncSALLQDDI<br>TAAIOcAK                                    | 130274 | Ras GTPase-activating-like protein IQGAP2 OS=Mus musculus GN=Iqgap2 PE=1 SV=2 - [IOGA2_MOUSE]                                                              | Q3UQ44        |
| 479 |                                                                  | 131181 | Sorbitol dehydrogenase OS=Mus musculus GN=Sord PE=1 SV=3 - [DHSO_MOUSE]                                                                                    | Q64442        |
| 480 |                                                                  | 131245 | Lysozyme C-2 OS=Mus musculus GN=Lyz2 PE=1 SV=2 - [LYZ2_MOUSE]                                                                                              | P08905        |

|     |                                                                              |        |                                                                                                                                                                                                                               |               |
|-----|------------------------------------------------------------------------------|--------|-------------------------------------------------------------------------------------------------------------------------------------------------------------------------------------------------------------------------------|---------------|
| 481 | ELGGAIDSGAAYVLEq<br>ASSHIGNSTQAAVR<br>FHVHPILLKPNITSnSN                      | 67020  | Atlastin-3 OS=Mus musculus GN=Atl3 PE=1 SV=1 - [ATLA3_MOUSE]                                                                                                                                                                  | Q91YH5        |
| 482 | PVEGDDSVSLTcDSYT<br>DPDNINYLWSR                                              | 131422 | Carcinoembryonic antigen-related cell adhesion molecule 1 OS=Mus musculus GN=Ceacam1 PE=1 SV=1 - [CEAM1_MOUSE]                                                                                                                | P31809        |
| 483 | DGVINMSIPIVLPVSAD<br>DKAR                                                    | 132545 | Bifunctional 3'-phosphoadenosine 5'-phosphosulfate synthase 2 OS=Mus musculus GN=Papss2 PE=1 SV=2 - [PAPS2_MOUSE]                                                                                                             | O88428        |
| 484 | TGGVLTyLnLTSWGEL<br>MK                                                       | 132613 | Guanidinoacetate N-methyltransferase OS=Mus musculus GN=Gamt PE=1 SV=1 - [GAMT_MOUSE]                                                                                                                                         | O35969        |
| 485 | LGEScIFAPANVTSEKEI<br>QAALTLAK                                               | 132650 | 3-hydroxyacyl-CoA dehydrogenase type-2 OS=Mus musculus GN=Hsd17b10 PE=1 SV=4 - [HCD2_MOUSE]                                                                                                                                   | O08756        |
| 486 | MSATFIGNSTAIQELFK                                                            | 133363 | Tubulin beta-2A chain OS=Mus musculus GN=Tubb2a PE=1 SV=1 - [TBB2A_MOUSE] Tubulin beta-2B chain OS=Mus musculus GN=Tubb2b PE=1 SV=1 - [TBB2B_MOUSE] Tubulin beta-4B chain OS=Mus musculus GN=Tubb4b PE=1 SV=1 - [TBB4B_MOUSE] | Q7TMM9;P68372 |
| 487 | mAATFIGNSTAIQELFK                                                            | 133364 | Tubulin beta-4A chain OS=Mus musculus GN=Tubb4a PE=1 SV=3 - [TBB4A_MOUSE]                                                                                                                                                     |               |
| 488 | MASTFIGNSTAIQELFK                                                            | 133365 | Tubulin beta-6 chain OS=Mus musculus GN=Tubb6 PE=1 SV=1 - [TBB6_MOUSE]                                                                                                                                                        |               |
| 489 | NNLSFIETSALDSTNVE<br>EAFK                                                    | 62453  | Ras-related protein Rab-11B OS=Mus musculus GN=Rab11b PE=1 SV=3 - [RB11B_MOUSE]                                                                                                                                               | P46638        |
| 490 | KVPILVAQEGDSLQQL<br>NDSSVSIISALK                                             | 133802 | Prostaglandin E synthase 2 OS=Mus musculus GN=Ptges2 PE=1 SV=3 - [PGES2_MOUSE]                                                                                                                                                | Q8BWM0        |
| 491 | GNEFFcEVEDDYIqDKF<br>NLTLGLnEQVPHYR                                          | 134262 | Casein kinase II subunit beta OS=Homo sapiens GN=CSNK2B PE=1 SV=1 - [CSK2B_HUMAN]                                                                                                                                             | P67870        |
| 492 | MLVQDKTEVLnYTTIP<br>VYLPETIGAHQGSR                                           | 134370 | NADH dehydrogenase [ubiquinone] 1 alpha subcomplex subunit 10, mitochondrial OS=Mus musculus GN=Ndufa10 PE=1 SV=1 - [NDUAA_MOUSE]                                                                                             | Q99LC3        |
| 493 | LADDVDLEqVAnETHG<br>HVGADLAAALcSEAAALQ<br>AIR                                | 134384 | Transitional endoplasmic reticulum ATPase OS=Homo sapiens GN=VCP PE=1 SV=4 - [TERA_HUMAN]                                                                                                                                     | P55072        |
| 494 | TEGAIDDSLIGGnASAE<br>GPEGEGTESTVVTGVD<br>IVMNHHLQETSFTK<br>KILcEELGAPANSAVnc | 134835 | Translationally-controlled tumor protein OS=Mus musculus GN=Tpt1 PE=1 SV=1 - [TCTP_MOUSE]                                                                                                                                     | P63028        |
| 495 | VPLEDFGGHHPDPnLT<br>YAADLVETMK                                               | 135275 | Phosphoglucomutase-1 OS=Mus musculus GN=Pgm1 PE=1 SV=4 - [PGM1_MOUSE]                                                                                                                                                         | Q9D0F9        |
| 496 | LSTETFGALLGGHPSFL<br>TTqDIHLGVnESLTDTA<br>TQSnLPTSLEGLSnLSD<br>VDLScNDLTR    | 135347 | Ornithine carbamoyltransferase, mitochondrial OS=Mus musculus GN=Otc PE=1 SV=1 - [OTC_MOUSE]                                                                                                                                  | P11725        |
| 497 |                                                                              | 102956 | Protein flightless-1 homolog OS=Mus musculus GN=Flii PE=1 SV=1 - [FLII_MOUSE]                                                                                                                                                 | Q9JJ28        |
| 498 | LSALDNLNlHSSIFLK                                                             | 137045 | Hypoxia up-regulated protein 1 OS=Mus musculus GN=Hyou1 PE=1 SV=1 - [HYOU1_MOUSE] Hypoxia up-regulated protein 1 OS=Rattus norvegicus GN=Hyou1 PE=1 SV=1 - [HYOU1_RAT]                                                        | Q9JKR6;Q63617 |
| 499 | TEqLIqAPNTSVHIYEP<br>YPAGADVFPGLPNK<br>SNTGGQAFPqcVFDHW                      | 137928 | Niemann-Pick C1 protein OS=Mus musculus GN=Npc1 PE=1 SV=2 - [NPC1_MOUSE]                                                                                                                                                      | O35604        |
| 500 | qILPGDPFDNSSRPSQV<br>VAETR                                                   | 137992 | Elongation factor 2 OS=Mus musculus GN=Eef2 PE=1 SV=2 - [EF2_MOUSE]                                                                                                                                                           | P58252        |
| 501 | VAAELQAGTcYInnYN<br>VSPVELPFGGYK                                             | 138288 | 4-trimethylaminobutyraldehyde dehydrogenase OS=Mus musculus GN=Aldh9a1 PE=1 SV=1 - [AL9A1_MOUSE]                                                                                                                              | Q9JLJ2        |
| 502 | LTFFnStLnTSLGVAQG<br>EALPIGAHR                                               | 138335 | Cytosolic 10-formyltetrahydrofolate dehydrogenase OS=Mus musculus GN=Aldh1l1 PE=1 SV=1 - [AL1L1_MOUSE]                                                                                                                        | Q8R0Y6        |
| 503 | QAIDDDcNqTGqMTAG<br>LLDWPQGTfASQVTLT<br>GDKVK<br>DAIKPNLMQTLEGTPV            | 138475 | Electron transfer flavoprotein subunit beta OS=Mus musculus GN=Etfb PE=1 SV=3 - [ETFB_MOUSE]                                                                                                                                  | Q9DCW4        |
| 504 | FVHAGPFANIAHGNSI<br>IADR                                                     | 139160 | C-1-tetrahydrofolate synthase, cytoplasmic OS=Mus musculus GN=Mthfd1 PE=1 SV=4 - [C1TC_MOUSE]                                                                                                                                 | Q922D8        |
| 505 | NFDSLISNcTEELnAG<br>VEVLK<br>YQLSEQSANScLNIQKP                               | 139241 | Glutathione reductase, mitochondrial OS=Mus musculus GN=Gsr PE=1 SV=3 - [GSHR_MOUSE]                                                                                                                                          | P47791        |
| 506 | TVPLEDLPYTLNMTATI<br>TSOHGIER                                                | 139811 | von Willebrand factor A domain-containing protein 5A OS=Mus musculus GN=Vwa5a PE=1 SV=2 - [VMA5A_MOUSE]                                                                                                                       | Q99KC8        |
| 507 | NFSAIINPPQAcILAIGAS<br>EDKLIPADNEK                                           | 140223 | Dihydrolipoyllysine-residue acetyltransferase component of pyruvate dehydrogenase complex, mitochondrial OS=Mus musculus GN=Dlat PE=1 SV=2 - [ODP2_MOUSE]                                                                     | Q8BMF4        |
| 508 | GDITKLEVDAlVnAAnS<br>SLLGGGGVDGcIHR                                          | 141859 | O-acetyl-ADP-ribose deacetylase MACROD1 OS=Mus musculus GN=Macrodl PE=1 SV=2 - [MACD1_MOUSE]                                                                                                                                  | Q922B1        |
| 509 | VVSVDISFRPLnETFPV<br>VYIETPKR                                                | 142571 | Pregnancy zone protein OS=Mus musculus GN=Pzp PE=1 SV=3 - [PZP_MOUSE]                                                                                                                                                         | Q61838        |
| 510 | YATENDISSLHnSTLTcL<br>VnQTSTLTGTSPMEK                                        | 142891 | Solute carrier organic anion transporter family member 1B2 OS=Mus musculus GN=Slco1b2 PE=1 SV=1 - [SO1B2_MOUSE]                                                                                                               | Q9JLJ3        |
| 511 | AEDcnqSWHFnlDEIKD<br>LLR                                                     | 142926 | Ribonuclease T2-A OS=Mus musculus GN=Rnaset2a PE=1 SV=1 - [RNT2A_MOUSE]                                                                                                                                                       | C0HKG5        |
| 512 | VVELLADIVqNSSLSDS<br>QIEK                                                    | 143123 | Cytochrome b-c1 complex subunit 1, mitochondrial OS=Mus musculus GN=Uqerc1 PE=1 SV=2 - [QCR1_MOUSE]                                                                                                                           | Q9CZ13        |
| 513 | VNDIDIIVNWVNTTLK                                                             | 143214 | Plastin-2 OS=Mus musculus GN=Lcp1 PE=1 SV=4 - [PLSL_MOUSE]                                                                                                                                                                    | Q61233        |
| 514 | EGLLSMANAGPNTnGS<br>qFFITTVPTPHLDGK                                          | 125515 | Peptidyl-prolyl cis-trans isomerase D OS=Mus musculus GN=Ppid PE=1 SV=3 - [PPID_MOUSE]                                                                                                                                        | Q9CR16        |
| 515 | VNFSPPGDTSNLFPGT<br>WYLER                                                    | 144361 | Hydroxymethylglutaryl-CoA synthase, mitochondrial OS=Mus musculus GN=Hmgcs2 PE=1 SV=2 - [HMC2_MOUSE]                                                                                                                          | P54869        |
| 516 | SVGIPVLCnATDDVFS<br>PSHAIPIETAK                                              | 144448 | Phospholipase ABHD3 OS=Mus musculus GN=Abhd3 PE=1 SV=1 - [ABHD3_MOUSE]                                                                                                                                                        | Q91ZH7        |

|     |                                                                        |        |                                                                                                        |        |
|-----|------------------------------------------------------------------------|--------|--------------------------------------------------------------------------------------------------------|--------|
| 517 | DGScSAEYIPFAPGDYD<br>VnITYGGVHIPGSPFRV<br>PSK                          | 144972 | Filamin-B OS=Mus musculus GN=Flnb PE=1 SV=3 - [FLNB_MOUSE]                                             | Q80X90 |
| 518 | LKENDQLAINDTPLDq<br>NISHqAIALLOQTGS                                    | 145683 | InaD-like protein OS=Mus musculus GN=Patj PE=1 SV=2 - [INADL_MOUSE]                                    | Q63ZW7 |
| 519 | TVSYNGVLGPEcGTEDI<br>NLTLDPYSENSIPLR                                   | 129448 | Protein-glutamine gamma-glutamyltransferase 2 OS=Mus musculus GN=Tgm2 PE=1 SV=4 - [TGM2_MOUSE]         | P21981 |
| 520 | KFDVNTSAVqVLEHIG<br>nLDR                                               | 145760 | Clathrin heavy chain 1 OS=Mus musculus GN=Cltc PE=1 SV=3 - [CLH1_MOUSE]                                | Q68FD5 |
| 521 | NVNTALNTTQIPSSIEDI<br>FNDDR                                            | 146271 | NEDD8-activating enzyme E1 regulatory subunit OS=Mus musculus GN=Nae1 PE=1 SV=1 - [ULA1_MOUSE]         | Q8VBW6 |
| 522 | ENLWLNLTGDSILcGR                                                       | 146424 | Ubiquitin carboxyl-terminal hydrolase 5 OS=Mus musculus GN=Usp5 PE=1 SV=1 - [UBP5_MOUSE]               | P56399 |
| 523 | AVEILADIIQNSTLGEA<br>EIERER                                            | 146468 | Mitochondrial-processing peptidase subunit beta OS=Mus musculus GN=Pmpcb PE=1 SV=1 - [MPPB_MOUSE]      | Q9CXT8 |
| 524 | ESGYLHIQATKPDTVGc<br>ALnDSPVGLAAAYILEK<br>VNYEGGTWDWIAEAL<br>SSnHTR    | 146685 | Epoxide hydrolase 1 OS=Mus musculus GN=Ephx1 PE=1 SV=2 - [HYEP_MOUSE]                                  | Q9D379 |
| 525 | ILLDDMATSALDnESEA<br>TVFQKE nGTITAA nAST                               | 147606 | Bile salt export pump OS=Mus musculus GN=Abcb11 PE=1 SV=2 - [ABCBB_MOUSE]                              | Q9QY30 |
| 527 | LNDGAAALVLMTAEA<br>AOR                                                 | 147798 | Acetyl-CoA acetyltransferase, mitochondrial OS=Mus musculus GN=Acat1 PE=1 SV=1 - [THIL_MOUSE]          | Q8QZT1 |
| 528 | ASEQILSLVAqFQNNK<br>L                                                  | 148472 | Malonyl-CoA decarboxylase, mitochondrial OS=Mus musculus GN=Mlycd PE=1 SV=1 - [DCMC_MOUSE]             | Q99J39 |
| 529 | GAIQIPTVSFSHEESnTT<br>ALAEFGEYIR                                       | 149106 | N-fatty-acyl-amino acid synthase/hydrolase PM20D1 OS=Mus musculus GN=Pm20d1 PE=1 SV=1 - [P20D1_MOUSE]  | Q8C165 |
| 530 | SLGLSLEETPVVFENV<br>S<br>FHQATILPK                                     | 149503 | Fatty acid synthase OS=Mus musculus GN=Fasn PE=1 SV=2 - [FAS_MOUSE]                                    | P19096 |
| 531 | GeQLLVYPGAFNLTTG<br>PAHWELLOR                                          | 149751 | Omega-amidase NIT2 OS=Mus musculus GN=Nit2 PE=1 SV=1 - [NIT2_MOUSE]                                    | Q9JHW2 |
| 532 | LNVTSTWnLASPLLSV<br>NVDGTQR                                            | 150075 | Propionyl-CoA carboxylase alpha chain, mitochondrial OS=Mus musculus GN=Pcca PE=1 SV=2 - [PCCA_MOUSE]  | Q91ZA3 |
| 533 | KYNVTVIQYIGELLR                                                        | 150150 | Very long-chain acyl-CoA synthetase OS=Mus musculus GN=Slc27a2 PE=1 SV=2 - [S27A2_MOUSE]               | O35488 |
| 534 | LLHYLGHVMVnGPTTP<br>IPVnVSPSPVDPAPVV<br>PIGPPPAGER<br>ILcEELGAPANSANcV | 150156 | Pyruvate carboxylase, mitochondrial OS=Mus musculus GN=Pc PE=1 SV=1 - [PYC_MOUSE]                      | Q05920 |
| 535 | PLEDFGGHHPDPNLTY<br>AADLVETMK                                          | 130511 | Phosphoglucomutase-1 OS=Mus musculus GN=Pgm1 PE=1 SV=4 - [PGM1_MOUSE]                                  | Q9D0F9 |
| 536 | GSEPPVFLIEIHYMGSP<br>NATEAPLVFVGK                                      | 150644 | Cytosol aminopeptidase OS=Mus musculus GN=Lap3 PE=1 SV=3 - [AMPL_MOUSE]                                | Q9CPY7 |
| 537 | SSYGRPGAcYIDIPADF<br>VTLOANVTSIK                                       | 150784 | 2-hydroxyacyl-CoA lyase 1 OS=Mus musculus GN=Hac11 PE=1 SV=2 - [HACL1_MOUSE]                           | Q9QXE0 |
| 538 | IPENVSLQDAAVLPVS<br>YGTAILAVDHR                                        | 150786 | Quinone oxidoreductase-like protein 2 OS=Mus musculus PE=1 SV=1 - [QORL2_MOUSE]                        | Q3UNZ8 |
| 539 | EYLISLDPENLTLEK                                                        | 150788 | Peroxisomal carnitine O-octanoyltransferase OS=Mus musculus GN=Crot PE=1 SV=1 - [OCTC_MOUSE]           | Q9DC50 |
| 540 | AFInGTGVETVVSADLP<br>NAHGLAVDWVSR<br>LNqATVTSNRPLFGY                   | 151102 | Prolow-density lipoprotein receptor-related protein 1 OS=Mus musculus GN=Lrp1 PE=1 SV=1 - [LRP1_MOUSE] | Q91ZX7 |
| 541 | qcSElcGSnHSFMPIVLE<br>MVPLK<br>LNqATISSNRPLFGYq                        | 151481 | Cytochrome c oxidase subunit 2 OS=Mus musculus GN=Mtco2 PE=1 SV=1 - [COX2_MOUSE]                       | P00405 |
| 542 | SElcGSnHSFMPIVLEM<br>VPLK                                              | 151482 | Cytochrome c oxidase subunit 2 OS=Acomys ignitus GN=MT-CO2 PE=3 SV=1 - [COX2_ACOIG]                    |        |
| 543 | TGEAnLTQLYTQEALD<br>FIQTQHAR                                           | 151545 | N-acetylgalactosamine-6-sulfatase OS=Mus musculus GN=Gains PE=1 SV=2 - [GALNS_MOUSE]                   | Q571E4 |
| 544 | LAIFFNLTSYGYPVLY<br>PTGWSSSDNVNcRPR<br>EGTSSQGIQPLVSNIS<br>AcQVIAEAVR  | 151821 | Integrin alpha-1 OS=Mus musculus GN=Itga1 PE=1 SV=2 - [ITA1_MOUSE]                                     | Q3V3R4 |
| 545 | LGLALnYSVFYIEIQN<br>APEQAChLAK                                         | 151989 | T-complex protein 1 subunit eta OS=Mus musculus GN=Cct7 PE=1 SV=1 - [TCPH_MOUSE]                       | P80313 |
| 546 | TAASILWQAYPILnISEK                                                     | 152464 | 14-3-3 protein gamma OS=Mus musculus GN=Ywhag PE=1 SV=2 - [1433G_MOUSE]                                | P61982 |
| 547 | IKVDEFVTGnLSFDQIN<br>QAFDLMHSGDSIR                                     | 153250 | Liver carboxylesterase 1 OS=Mus musculus GN=Ces1 PE=1 SV=1 - [EST1_MOUSE]                              | Q8VCC2 |
| 548 | nTTSYPPMcSQDAVGG<br>QVLSELFTNR                                         | 153267 | Alcohol dehydrogenase class-3 OS=Mus musculus GN=Adh5 PE=1 SV=3 - [ADHX_MOUSE]                         | P28474 |
| 549 | LDVLVNNAYAGVQAIL<br>NTTNK                                              | 153269 | Carboxylesterase 1D OS=Mus musculus GN=Ces1d PE=1 SV=1 - [CES1D_MOUSE]                                 | Q8VCT4 |
| 550 | nATVVGqAQGMVAA<br>AQGEIGFLmVMnFAFT<br>TGK                              | 153371 | Dehydrogenase/reductase SDR family member 1 OS=Mus musculus GN=Dhrs1 PE=1 SV=1 - [DHRS1_MOUSE]         | Q99L04 |
| 551 | LWLPVnLTWADLEDK<br>DGR                                                 | 59371  | Dirigent protein 8 OS=Arabidopsis thaliana GN=DIR8 PE=3 SV=1 - [DIR8_ARATH]                            | F4JDF3 |
| 552 | QNqLNLSTLLVNPEGPT<br>LTqLNSVqSSERPLFLV<br>HPIEGSTTVFHSAAK              | 153454 | Ceramide synthase 2 OS=Mus musculus GN=Cers2 PE=1 SV=1 - [CERS2_MOUSE]                                 | Q924Z4 |
| 553 |                                                                        | 153702 | Fatty acid synthase OS=Mus musculus GN=Fasn PE=1 SV=2 - [FAS_MOUSE]                                    | P19096 |

|     |                                                                                                                                                 |        |                                                                                                                                                            |        |
|-----|-------------------------------------------------------------------------------------------------------------------------------------------------|--------|------------------------------------------------------------------------------------------------------------------------------------------------------------|--------|
| 554 | NASNPLAHYDDTAEI<br>LqQcDGKLDMLVASAG<br>TGGTITGIAR                                                                                               | 154157 | Cystathionine beta-synthase OS=Mus musculus GN=Cbs PE=1 SV=3 - [CBS_MOUSE]                                                                                 | Q91WT9 |
| 555 | LAPGTqASPLVPAFEGD<br>cYYLAVGGAVAqHNW<br>SHINTVLODOEFR                                                                                           | 154297 | Sarcosine dehydrogenase, mitochondrial OS=Mus musculus GN=Sardh PE=1 SV=1 - [SARDH_MOUSE]                                                                  | Q99LB7 |
| 556 | DVGSGTTnNSQAcAQF<br>LEQYFHNSDLTEFMR                                                                                                             | 154560 | Tripeptidyl-peptidase 1 OS=Mus musculus GN=Tpp1 PE=1 SV=2 - [TPP1_MOUSE]                                                                                   | O89023 |
| 557 | VDEFVTGNLSFDQINQ<br>AFDLMHSGDSIR                                                                                                                | 154641 | Alcohol dehydrogenase class-3 OS=Mus musculus GN=Adh5 PE=1 SV=3 - [ADHX_MOUSE]                                                                             | P28474 |
| 558 | NQSFcPTVNLDKWLWL<br>VSEQTR                                                                                                                      | 154643 | 60S ribosomal protein L27a OS=Mus musculus GN=Rpl27a PE=1 SV=5 - [RL27A_MOUSE]                                                                             | P14115 |
| 559 | EGLALINGTQMITSLGc<br>EALER                                                                                                                      | 154790 | Histidine ammonia-lyase OS=Mus musculus GN=Hal PE=1 SV=1 - [HUTH_MOUSE]                                                                                    | P35492 |
| 560 | EKKKEqVISLGPqVAEG<br>ENVFGVcHIFASFNDTF<br>VHVTDLSGK                                                                                             | 154864 | 40S ribosomal protein S14 OS=Mus musculus GN=Rps14 PE=1 SV=3 - [RS14_MOUSE]                                                                                | P62264 |
| 561 | NEASILTEIQHQVAnGSI<br>VLmHDIHSPTVnALPR                                                                                                          | 118803 | Peptidoglycan-N-acetylglucosamine deacetylase OS=Streptococcus pneumoniae (strain ATCC BAA-255 / R6) GN=pgdA PE=1 SV=1 - [PGDA_STRR6]                      | Q8DP63 |
| 562 | YGIVVIDEcPGVGIVLPq<br>FGLnESLR                                                                                                                  | 154906 | Beta-glucuronidase OS=Mus musculus GN=Gusb PE=1 SV=2 - [BGLR_MOUSE]                                                                                        | P12265 |
| 563 | AASLGLLQFPILNASVD<br>ENcQNITYK                                                                                                                  | 155068 | Lipoamide acyltransferase component of branched-chain alpha-keto acid dehydrogenase complex, mitochondrial OS=Mus musculus GN=Dbt PE=1 SV=2 - [ODB2_MOUSE] | P53395 |
| 564 | ENGTITAAANASTLNDG<br>AAALVLMTAEAAQR<br>AcGANLPENFISQIFSQ                                                                                        | 119270 | Acetyl-CoA acetyltransferase, mitochondrial OS=Mus musculus GN=Acat1 PE=1 SV=1 - [THIL_MOUSE]                                                              | Q8QZT1 |
| 565 | AMAAR                                                                                                                                           | 155345 | Bifunctional epoxide hydrolase 2 OS=Mus musculus GN=Ephx2 PE=1 SV=2 - [HYES_MOUSE]                                                                         | P34914 |
| 566 | PGAcYIDIPADFVTLQA<br>NVTSIK                                                                                                                     | 155347 | 2-hydroxyacyl-CoA lyase 1 OS=Mus musculus GN=Hac11 PE=1 SV=2 - [HACL1_MOUSE]                                                                               | Q9QXE0 |
| 567 | AVEILADIIQnSTLGEAE<br>IER                                                                                                                       | 68803  | Mitochondrial-processing peptidase subunit beta OS=Mus musculus GN=Pmpcb PE=1 SV=1 - [MPPB_MOUSE]                                                          | Q9CXT8 |
| 568 | GNFTLPEVAEcFDEITY<br>VELQKEEAQK<br>nLSFATIIDVLSKPV<br>NK                                                                                        | 155418 | Heterogeneous nuclear ribonucleoprotein U OS=Mus musculus GN=Hnrpu PE=1 SV=1 - [HNRPU_MOUSE]                                                               | Q8VEK3 |
| 569 | EAGLPPNIIQFVPADGP<br>TFGDTVTSSEHLcGINF<br>TGSVPTFK                                                                                              | 155532 | Acid ceramidase OS=Mus musculus GN=Asah1 PE=1 SV=1 - [ASAH1_MOUSE]                                                                                         | Q9WV54 |
| 570 | AFEnVTDLQWLILDHN<br>LLENSK                                                                                                                      | 155894 | Delta-1-pyrroline-5-carboxylate dehydrogenase, mitochondrial OS=Mus musculus GN=Aldh4a1 PE=1 SV=3 - [AL4A1_MOUSE]                                          | Q8CHT0 |
| 571 | KEEQVISLGPQVAEGEn<br>VFGVcHIFASFNDTFVH<br>VTDLSGK                                                                                               | 156310 | Lumican OS=Mus musculus GN=Lum PE=1 SV=2 - [LUM_MOUSE]                                                                                                     | P51885 |
| 572 | KVPGFVcFLTSEDVPGS<br>NITGIFNDETVFAK<br>PLLAHMQLPPEIMPTVI<br>DEYLDNGSDESATR                                                                      | 156462 | 40S ribosomal protein S14 OS=Mus musculus GN=Rps14 PE=1 SV=3 - [RS14_MOUSE]                                                                                | P62264 |
| 573 | GGYDVEIQNITDEFGV<br>LGVAGPYAR                                                                                                                   | 156506 | Xanthine dehydrogenase/oxidase OS=Mus musculus GN=Xdh PE=1 SV=5 - [XDH_MOUSE]                                                                              | Q00519 |
| 574 | SYLDDRPLqHYIAVSSP<br>TNTTYVqYALAnLTG<br>VLNFDLVDNISVDPV<br>TGDLVWGcHPNGMR                                                                       | 156524 | Carboxylesterase 3A OS=Mus musculus GN=Ces3a PE=1 SV=2 - [EST3A_MOUSE]                                                                                     | Q63880 |
| 575 | VVFLSPAVPEEPEAYnL<br>TVLIR                                                                                                                      | 156697 | Dimethylglycine dehydrogenase, mitochondrial OS=Mus musculus GN=Dmgdh PE=1 SV=1 - [M2GD_MOUSE]                                                             | Q9DBT9 |
| 576 | LVSDDLLSSLANLVGnL<br>GInGTTK                                                                                                                    | 97331  | Nicastrin OS=Mus musculus GN=Ncstn PE=1 SV=3 - [NICA_MOUSE]                                                                                                | P57716 |
| 577 | LAETVSqLWPAqELA<br>HcGNLScLSDLQVAAK<br>AQASQTPVNLtnHSY<br>FnLAGQGSPhIYDHEVT<br>IAADAYLPVDETLIPTG<br>VIAPVFGTAFDI.R<br>VVDTLGAGDTFnASVIF<br>LSLK | 106190 | Serum paraoxonase/arylesterase 1 OS=Mus musculus GN=Pon1 PE=1 SV=2 - [PON1_MOUSE]                                                                          | P52430 |
| 578 | AFVEnITVLENSLVFK                                                                                                                                | 157155 | Plexin-B2 OS=Mus musculus GN=Plxb2 PE=1 SV=1 - [PLXB2_MOUSE]                                                                                               | B2RXS4 |
| 579 | TKLQDLEVAnQTLKDE<br>YDALQITFTALEEK<br>LGAInSTLSNESKEAFID<br>WAR                                                                                 | 157628 | Phosphatidylinositol-binding clathrin assembly protein OS=Mus musculus GN=Picalm PE=1 SV=1 - [PICAL_MOUSE]                                                 | Q7M6Y3 |
| 580 | IDMNLTDLLGELQRDP<br>WPVPOGK                                                                                                                     | 157801 | Formimidoyltransferase-cyclodeaminase OS=Mus musculus GN=Ftdc PE=1 SV=1 - [FTCD_MOUSE]                                                                     | Q91XD4 |
| 581 | ISASGALEALEAQVln<br>LSLK                                                                                                                        | 157873 | Aldose 1-epimerase OS=Mus musculus GN=Galm PE=1 SV=1 - [GALM_MOUSE]                                                                                        | Q8K157 |
| 582 | SGTIFDNFLITNDEAYA<br>EEFGNETWGVTK<br>AGYFnFTSATITYLAqE<br>DGPVVIGSTAPGqGGI<br>LAOR                                                              | 157931 | Ketohexokinase OS=Mus musculus GN=Khk PE=1 SV=1 - [KHK_MOUSE]                                                                                              | P97328 |
| 583 | TNLSSVSDcVQQVVEL<br>LOEQNIVPHHTIK                                                                                                               | 157937 | Major urinary protein 3 OS=Mus musculus GN=Mup3 PE=1 SV=1 - [MUP3_MOUSE]                                                                                   | P04939 |
| 584 |                                                                                                                                                 | 158135 | Autophagy-related protein 16-1 OS=Mus musculus GN=Atg16l1 PE=1 SV=1 - [A16L1_MOUSE]                                                                        | Q8C0J2 |
| 585 |                                                                                                                                                 | 158516 | ERO1-like protein beta OS=Mus musculus GN=Ero1b PE=1 SV=1 - [ERO1B_MOUSE]                                                                                  | Q8R2E9 |
| 586 |                                                                                                                                                 | 158784 | Protein transport protein Sec23A OS=Mus musculus GN=Sec23a PE=1 SV=2 - [SC23A_MOUSE]                                                                       | Q01405 |
| 587 |                                                                                                                                                 | 159034 | Inter alpha-trypsin inhibitor, heavy chain 4 OS=Mus musculus GN=Itih4 PE=1 SV=2 - [ITIH4_MOUSE]                                                            | A6X935 |
| 588 |                                                                                                                                                 | 159091 | Calreticulin OS=Mus musculus GN=Calr PE=1 SV=1 - [CALR_MOUSE]                                                                                              | P14211 |
| 589 |                                                                                                                                                 | 159252 | Translocon-associated protein subunit beta OS=Mus musculus GN=Ssr2 PE=1 SV=1 - [SSRB_MOUSE]                                                                | Q9CPW5 |
| 590 |                                                                                                                                                 | 159285 | Bifunctional 3'-phosphoadenosine 5'-phosphosulfate synthase 2 OS=Mus musculus GN=Paps2 PE=1 SV=2 - [PAPS2_MOUSE]                                           | O88428 |

|     |                                                                           |        |                                                                                                                                                                           |               |
|-----|---------------------------------------------------------------------------|--------|---------------------------------------------------------------------------------------------------------------------------------------------------------------------------|---------------|
| 591 | NLSPYVSNELLEAFSQ<br>FGPIER                                                | 159291 | Splicing factor, proline- and glutamine-rich OS=Mus musculus GN=Sfpq PE=1 SV=1 - [SFPQ_MOUSE]                                                                             | Q8VIJ6        |
| 592 | DGMGTVDFADFPDQVAI<br>QLNDTHPALAIPELMR<br>GVDVIIEMLANENLSN<br>DLK          | 159760 | Glycogen phosphorylase, liver form OS=Mus musculus GN=Pygl PE=1 SV=4 - [PYGL_MOUSE]                                                                                       | Q9ET01        |
| 593 | VIDLWDLAQSANFTEK<br>ELESFR                                                | 159994 | Quinone oxidoreductase OS=Mus musculus GN=Cryz PE=1 SV=1 - [QOR_MOUSE]                                                                                                    | P47199        |
| 594 | VIDLWDLAQSANFTEK<br>ELESFR                                                | 160003 | Alpha-2-macroglobulin receptor-associated protein OS=Mus musculus GN=Lrap1 PE=1 SV=1 - [AMRP_MOUSE]                                                                       | P55302        |
| 595 | GSHQPFVDVSAFNASYS<br>DSGLFGIYTISqAAAAG<br>EVINAAYNOVK                     | 160079 | Cytochrome b-c1 complex subunit 2, mitochondrial OS=Mus musculus GN=Uqrc2 PE=1 SV=1 - [QCR2_MOUSE]                                                                        | Q9DB77        |
| 596 | VVNVTTGGVSFLnSVTP<br>MDYFPGLnLEGYPNR<br>VIDLWDLAQSAnFTEK<br>ELESFREELK    | 160288 | Alpha-aminoacidic semialdehyde synthase, mitochondrial OS=Mus musculus GN=Aass PE=1 SV=1 - [AASS_MOUSE]                                                                   | Q99K67        |
| 597 | VIDLWDLAQSAnFTEK<br>ELESFREELK                                            | 160403 | Alpha-2-macroglobulin receptor-associated protein OS=Mus musculus GN=Lrap1 PE=1 SV=1 - [AMRP_MOUSE]                                                                       | P55302        |
| 598 | LNEIANLAVNVIPNLSL<br>WEAAK                                                | 160587 | UDP-glucuronosyltransferase 2A3 OS=Mus musculus GN=Ugt2a3 PE=1 SV=1 - [UD2A3_MOUSE]                                                                                       | Q8BWQ1        |
| 599 | YNVTVIQYIGELLR                                                            | 160653 | Very long-chain acyl-CoA synthetase OS=Mus musculus GN=Slc27a2 PE=1 SV=2 - [S27A2_MOUSE]                                                                                  | O35488        |
| 600 | DDLFTNATIVATLTA<br>AcAqHcPEAMVcIIAnPV<br>nSTIPITAEVFKK<br>DDLFTNATIVATLTA | 160704 | Malate dehydrogenase, mitochondrial OS=Mus musculus GN=Mdh2 PE=1 SV=3 - [MDHM_MOUSE]                                                                                      | P08249        |
| 601 | AcAqHcPEAMVcIIAnPV<br>nSTIPITAEVFKK<br>DDLFTNATIVATLTA                    | 160705 | Malate dehydrogenase, mitochondrial OS=Homo sapiens GN=MDH2 PE=1 SV=3 - [MDHM_HUMAN]                                                                                      |               |
| 602 | NFTGEEIQYMLWLSAD<br>LK                                                    | 161004 | Ornithine carbamoyltransferase, mitochondrial OS=Mus musculus GN=Otc PE=1 SV=1 - [OTC_MOUSE]                                                                              | P11725        |
| 603 | EEVENFASNFLPGLPD<br>F                                                     | 161494 | Serine hydroxymethyltransferase, cytosolic OS=Mus musculus GN=Shmt1 PE=1 SV=3 - [GLYC_MOUSE]                                                                              | P50431        |
| 604 | IAPVDQIVTLMLDHMT<br>NTSNIFHVPVR<br>SlcTTVLELLDKYLIAN<br>ATNPESK           | 161769 | Triokinase/FMN cyclase OS=Mus musculus GN=Tkfc PE=1 SV=1 - [TKFC_MOUSE]                                                                                                   | Q8VC30        |
| 605 | SlcTTVLELLDKYLIAN<br>ATNPESK                                              | 162259 | 14-3-3 protein theta OS=Mus musculus GN=Ywhaq PE=1 SV=1 - [1433T_MOUSE]                                                                                                   | P68254        |
| 606 | TSLLVInTESNIEDFLQ<br>SLK                                                  | 162288 | ATP-binding cassette sub-family A member 6 OS=Mus musculus GN=Abca6 PE=1 SV=2 - [ABCA6_MOUSE]                                                                             | Q8K441        |
| 607 | YAFQELLDISFIPTLnF<br>SK                                                   | 164319 | Carboxylesterase 3B OS=Mus musculus GN=Ces3b PE=1 SV=2 - [EST3B_MOUSE]                                                                                                    | Q8VCU1        |
| 608 | NTTPDELLSAVLTAVL<br>QDVR                                                  | 164931 | 3-ketoacyl-CoA thiolase A, peroxisomal OS=Mus musculus GN=Acaa1a PE=1 SV=1 - [THIKA_MOUSE]                                                                                | Q921H8        |
| 609 | SnHLHnVSDSSVnDDP<br>VVIPSK                                                | 160944 | Probable L-type lectin-domain containing receptor kinase S.7 OS=Arabidopsis thaliana GN=LECRK57 PE=2 SV=1 - [LRKS7_ARATH]                                                 | Q9FHG4        |
| 610 | GVPQIEVTFDIDAnGILn<br>VSAVDK                                              | 50947  | Heat shock cognate 71 kDa protein OS=Homo sapiens GN=HSPA8 PE=1 SV=1 - [HSP7C_HUMAN] Heat shock cognate 71 kDa protein OS=Mus musculus GN=Hspa8 PE=1 SV=1 - [HSP7C_MOUSE] | P11142;P63017 |
| 611 | IHVEDNETVESSmLGY<br>NLENR                                                 | 33564  | Probable myosin-binding protein 4 OS=Arabidopsis thaliana GN=MYOB4 PE=3 SV=1 - [MYOB4_ARATH]                                                                              | F4INW9        |
| 612 | AEIAHNVSSK                                                                | 188634 | Putative 60S ribosomal protein L32' OS=Mus musculus GN=Rpl32-ps PE=5 SV=2 - [RL32P_MOUSE]                                                                                 | P17932        |
| 613 | IAnETGGHGSQPR                                                             | 188984 | Beta-glucuronidase OS=Mus musculus GN=Gusb PE=1 SV=2 - [BGLR_MOUSE]                                                                                                       | P12265        |
| 614 | NcSETQYESK                                                                | 189787 | 14-3-3 protein gamma OS=Mus musculus GN=Ywhag PE=1 SV=2 - [1433G_MOUSE]                                                                                                   | P61982        |
| 615 | EKAAnGTTVHVGHPSK                                                          | 6972   | 60S ribosomal protein L26 OS=Mus musculus GN=Rpl26 PE=1 SV=1 - [RL26_MOUSE]                                                                                               | P61255        |
| 616 | SILISAHGNSSR                                                              | 195591 | Bisphosphoglycerate mutase OS=Mus musculus GN=Bpgm PE=1 SV=2 - [PMGE_MOUSE]                                                                                               | P15327        |
| 617 | YQLSIHKPNPASEPK                                                           | 196849 | Sodium/potassium-transporting ATPase subunit alpha-1 OS=Mus musculus GN=Atp1a1 PE=1 SV=1 - [AT1A1_MOUSE]                                                                  | Q8VDN2        |
| 618 | HYQAVHDAGnDSGHG<br>GEAGLALTR                                              | 199586 | Early endosome antigen 1 OS=Mus musculus GN=Eea1 PE=1 SV=2 - [EEA1_MOUSE]                                                                                                 | Q8BL66        |
| 619 | WSPHHncTQVATASDT<br>TLR                                                   | 200426 | Protein TSSC1 OS=Mus musculus GN=Eipr1 PE=1 SV=2 - [TSSC1_MOUSE]                                                                                                          | Q8K0G5        |
| 620 | KNANcSIEESFQR                                                             | 6424   | Hydroxymethylglutaryl-CoA lyase, mitochondrial OS=Mus musculus GN=Hmgcl PE=1 SV=2 - [HMGCL_MOUSE]                                                                         | P38060        |
| 621 | KKHPDASVNFSEFSK                                                           | 200767 | High mobility group protein B1 OS=Homo sapiens GN=HMGB1 PE=1 SV=3 - [HMGB1_HUMAN]                                                                                         | P09429        |
| 622 | GHYNNVScAVFHPR                                                            | 201105 | Coatamer subunit alpha OS=Mus musculus GN=Copa PE=1 SV=2 - [COPA_MOUSE]                                                                                                   | Q8CIE6        |
| 623 | KHPDASVNFSEFSK                                                            | 201272 | High mobility group protein B1 OS=Homo sapiens GN=HMGB1 PE=1 SV=3 - [HMGB1_HUMAN]                                                                                         | P09429        |
| 624 | DVAcGAnHTLVLDQSK                                                          | 201833 | Protein RCC2 OS=Mus musculus GN=Rcc2 PE=1 SV=1 - [RCC2_MOUSE]                                                                                                             | Q8BK67        |
| 625 | NAScTLSSAVHSQGVV                                                          | 202013 | Methylome protein 50 OS=Mus musculus GN=Wdr77 PE=1 SV=1 - [MEP50_MOUSE]                                                                                                   | Q99J09        |
| 626 | RGNNTTSLLSQSVAK                                                           | 16843  | Cytochrome b-c1 complex subunit 2, mitochondrial OS=Mus musculus GN=Uqrc2 PE=1 SV=1 - [QCR2_MOUSE]                                                                        | Q9DB77        |
| 627 | LSHYKQnFSFcR                                                              | 18223  | Lysosomal alpha-mannosidase OS=Mus musculus GN=Man2b1 PE=1 SV=4 - [MA2B1_MOUSE]                                                                                           | O09159        |
| 628 | ETcPSLQGVHNTSYPR                                                          | 204133 | Peroxisomal NADH pyrophosphatase NUDT12 OS=Mus musculus GN=Nudt12 PE=1 SV=1 - [NUDT12_MOUSE]                                                                              | Q9DCN1        |
| 629 | VQHQASSTSPSSPNQT<br>SSEPRPLPAPR                                           | 205225 | Ral GTPase-activating protein subunit beta OS=Mus musculus GN=Ralgapb PE=1 SV=2 - [RLGPB_MOUSE]                                                                           | Q8BQZ4        |
| 630 | EVNVSPcPTDPcQLHK                                                          | 206597 | Epididymal secretory protein E1 OS=Mus musculus GN=Npc2 PE=1 SV=1 - [NPC2_MOUSE]                                                                                          | Q9Z0J0        |
| 631 | NVTSVTSLTQQR                                                              | 207906 | Myb-binding protein 1A OS=Mus musculus GN=Mybbp1a PE=1 SV=2 - [MBB1A_MOUSE]                                                                                               | Q7TPV4        |
| 632 | GQNQPVLNITNR                                                              | 208440 | Carbamoyl-phosphate synthase [ammonia], mitochondrial OS=Mus musculus GN=Cps1 PE=1 SV=2 - [CPSM_MOUSE]                                                                    | Q8C196        |
| 633 | VHNATLILSEGLKR                                                            | 209071 | Glycine dehydrogenase (decarboxylating), mitochondrial OS=Mus musculus GN=Gldc PE=1 SV=1 - [GCSP_MOUSE]                                                                   | Q91W43        |
| 634 | IIQHcSNYSTQELLR                                                           | 209987 | Dynammin-1-like protein OS=Mus musculus GN=Dnm1l PE=1 SV=2 - [DNM1L_MOUSE]                                                                                                | Q8K1M6        |

|     |                                                        |        |                                                                                                                  |        |
|-----|--------------------------------------------------------|--------|------------------------------------------------------------------------------------------------------------------|--------|
| 635 | GNNTTSLLSQSVAK                                         | 210406 | Cytochrome b-c1 complex subunit 2, mitochondrial OS=Mus musculus GN=Uqcr2 PE=1 SV=1 - [QCR2_MOUSE]               | Q9DB77 |
| 636 | VHITVcnITSR                                            | 210723 | Eosinophil cationic-type ribonuclease 3 OS=Mus musculus GN=Ear3 PE=1 SV=1 - [ECP3_MOUSE]                         | O35290 |
| 637 | KAWGISVLNPNKTK                                         | 211963 | Macrosialin OS=Mus musculus GN=Cd68 PE=1 SV=1 - [CD68_MOUSE]                                                     | P31996 |
| 638 | VYVGnLGNNGKTELE<br>R                                   | 212121 | Serine/arginine-rich splicing factor 3 OS=Mus musculus GN=Srsf3 PE=1 SV=1 - [SRSF3_MOUSE]                        | P84104 |
| 639 | VPTISINKTDGcHAYLS<br>K                                 | 212101 | Adenylyl cyclase-associated protein 1 OS=Mus musculus GN=Cap1 PE=1 SV=4 - [CAP1_MOUSE]                           | P40124 |
| 640 | LNKDNNDTLKDLLK                                         | 213209 | Golgi reassembly-stacking protein 2 OS=Mus musculus GN=Gorasp2 PE=1 SV=3 - [GORS2_MOUSE]                         | Q99JX3 |
| 641 | NVTELNEPLSNEER                                         | 214907 | 14-3-3 protein gamma OS=Mus musculus GN=Ywhag PE=1 SV=2 - [1433G_MOUSE]                                          | P61982 |
| 642 | nVTIEcPFKR                                             | 215804 | Polymeric immunoglobulin receptor OS=Mus musculus GN=Pigr PE=1 SV=1 - [PIGR_MOUSE]                               | O70570 |
| 643 | NLPmVVSETGWPSAGn<br>GnFTTPIASTYNR                      | 73299  | Probable glucan endo-1,3-beta-glucosidase BG4 OS=Arabidopsis thaliana GN=BG4 PE=2 SV=1 - [BG4_ARATH]             | O49352 |
| 644 | APPNATLEHFYQTSGK                                       | 217057 | Ceramide synthase 2 OS=Mus musculus GN=Cers2 PE=1 SV=1 - [CERS2_MOUSE]                                           | Q924Z4 |
| 645 | VVHSYEELEENYTR                                         | 217463 | Pyruvate carboxylase, mitochondrial OS=Mus musculus GN=Pc PE=1 SV=1 - [PYC_MOUSE]                                | Q05920 |
| 646 | AnLTWTVK                                               | 217557 | Lysosomal alpha-mannosidase OS=Mus musculus GN=Man2b1 PE=1 SV=4 - [MA2B1_MOUSE]                                  | O09159 |
| 647 | INnGGcQDLcLLTHQGH<br>VncScR                            | 217926 | Prolow-density lipoprotein receptor-related protein 1 OS=Mus musculus GN=Lrp1 PE=1 SV=1 - [LRP1_MOUSE]           | Q91ZX7 |
| 648 | TLLGYnQSK                                              | 219430 | H-2 class I histocompatibility antigen, K-B alpha chain OS=Mus musculus GN=H2-K1 PE=1 SV=1 - [HA1B_MOUSE]        | P01901 |
| 649 | QNYSTEVEAAVNR                                          | 219445 | Ferritin light chain 1 OS=Mus musculus GN=Ftl1 PE=1 SV=2 - [FRIL1_MOUSE]                                         | P29391 |
| 650 | VIIWKEEnGTWEK                                          | 43241  | Protein SEC13 homolog OS=Mus musculus GN=Sec13 PE=1 SV=3 - [SEC13_MOUSE]                                         | Q9D1M0 |
| 651 | ILMFLDESqNLYYIEV<br>NNQSSSNLR                          | 33083  | F-box protein At5g07610 OS=Arabidopsis thaliana GN=At5g07610 PE=2 SV=1 - [FB253_ARATH]                           | Q9FLS0 |
| 652 | GAQFSVNYSQGLR                                          | 222314 | Quinone oxidoreductase-like protein 2 OS=Mus musculus PE=1 SV=1 - [QORL2_MOUSE]                                  | Q3UNZ8 |
| 653 | GVTFNVTTVDTK                                           | 222435 | Chloride intracellular channel protein 1 OS=Homo sapiens GN=CLIC1 PE=1 SV=4 - [CLIC1_HUMAN]                      | O00299 |
| 654 | VYMKnVTVVLR                                            | 210136 | Lysosome-associated membrane glycoprotein 1 OS=Mus musculus GN=Lamp1 PE=1 SV=2 - [LAMP1_MOUSE]                   | P11438 |
| 655 | NDQDTWDYTNPNLSG<br>QGDPGSNPNKR                         | 223763 | Heterogeneous nuclear ribonucleoprotein L OS=Mus musculus GN=Hnrpl PE=1 SV=2 - [HNRPL_MOUSE]                     | Q8R081 |
| 656 | LYWISSGnHTINR                                          | 223816 | Prolow-density lipoprotein receptor-related protein 1 OS=Mus musculus GN=Lrp1 PE=1 SV=1 - [LRP1_MOUSE]           | Q91ZX7 |
| 657 | MGcqhHHcVPTPSGPTcY<br>cnPSFQLQADGK                     | 224151 | Prolow-density lipoprotein receptor-related protein 1 OS=Mus musculus GN=Lrp1 PE=1 SV=1 - [LRP1_MOUSE]           | Q91ZX7 |
| 658 | ATcIGNNSAAAVSMLK                                       | 226065 | Proteasome subunit alpha type-4 OS=Mus musculus GN=Psm4 PE=1 SV=1 - [PSA4_MOUSE]                                 | Q9R1P0 |
| 659 | ASIYQSVVINTSK                                          | 226387 | Dimethylaniline monooxygenase [N-oxide-forming] 5 OS=Mus musculus GN=Fmo5 PE=1 SV=4 - [FMO5_MOUSE]               | P97872 |
| 660 | LVEIVHPSQEEDRHSN<br>ASQSLcEIVR                         | 226905 | Serine/threonine-protein phosphatase 6 regulatory subunit 3 OS=Mus musculus GN=Ppp6r3 PE=1 SV=1 - [PP6R3_MOUSE]  | Q922D4 |
| 661 | FNISNGGPAPEAITDK<br>VSHYIINSSGPRPPVPPS<br>PaQPPPGVSPSR | 229462 | Phosphoglucomutase-1 OS=Mus musculus GN=Pgm1 PE=1 SV=4 - [PGM1_MOUSE]                                            | Q9D0F9 |
| 662 | SHYIINSSGPRPPVPPS<br>PaQPPPGVSPSR                      | 229969 | Adapter molecule crk OS=Mus musculus GN=Crk PE=1 SV=1 - [CRK_MOUSE]                                              | Q64010 |
| 663 | GFEKPTENSSAVLLQW<br>HEK                                | 44400  | Actin-related protein 2/3 complex subunit 5-like protein OS=Mus musculus GN=Arpc5l PE=1 SV=1 - [ARP5L_MOUSE]     | Q9D898 |
| 664 | TVSLnNLSADEVTR                                         | 231074 | NADH dehydrogenase [ubiquinone] 1 alpha subcomplex subunit 2 OS=Mus musculus GN=Ndufa2 PE=1 SV=3 - [NDUA2_MOUSE] | Q9CQ75 |
| 665 | GAAVNLTlVTPEK                                          | 231595 | Mitochondrial glutamate carrier 1 OS=Mus musculus GN=Slc25a22 PE=1 SV=1 - [GHC1_MOUSE]                           | Q9D6M3 |
| 666 | LDNVSHTPSSYIETLPK                                      | 45180  | Nucleosome assembly protein 1-like 4 OS=Mus musculus GN=Nap114 PE=1 SV=1 - [NP1L4_MOUSE]                         | Q78ZA7 |
| 667 | ESTGAqVQVAGDMLP<br>NSTER                               | 5400   | Poly(rC)-binding protein 1 OS=Mus musculus GN=Pcbp1 PE=1 SV=1 - [PCBP1_MOUSE]                                    | P60335 |
| 668 | SITIANQTNcPLYVTK                                       | 233830 | Dihydropyrimidinase-related protein 2 OS=Mus musculus GN=Dpysl2 PE=1 SV=2 - [DPYL2_MOUSE]                        | O08553 |
| 669 | VASSVPVENFTIHGGLS<br>R                                 | 234804 | 2-oxoglutarate dehydrogenase, mitochondrial OS=Mus musculus GN=Ogdh PE=1 SV=3 - [ODO1_MOUSE]                     | Q60597 |
| 670 | RqFnLTDDDLLR                                           | 235134 | 1,4-alpha-glucan-branching enzyme OS=Mus musculus GN=Gbe1 PE=1 SV=1 - [GLGB_MOUSE]                               | Q9D6Y9 |
| 671 | GGLAAYRTSVnLSSDG<br>QIIASQFMAHYK                       | 235638 | Niemann-Pick C1-like protein 1 OS=Mus musculus GN=Npc111 PE=2 SV=1 - [NPCL1_MOUSE]                               | Q6T3U4 |
| 672 | ATLGINDTLIR                                            | 237627 | Cystathionine gamma-lyase OS=Mus musculus GN=Cth PE=1 SV=1 - [CGL_MOUSE]                                         | Q8VCN5 |
| 673 | VAHSFNcTPIEGMLSHQ<br>LK                                | 53811  | Proliferation-associated protein 2G4 OS=Mus musculus GN=Pa2g4 PE=1 SV=3 - [PA2G4_MOUSE]                          | P50580 |
| 674 | NDnDSWDYTKPYLGR                                        | 239125 | Heterogeneous nuclear ribonucleoprotein L-like OS=Mus musculus GN=Hnrnpl PE=1 SV=3 - [HNRLL_MOUSE]               | Q921F4 |
| 675 | HIDcASVYGNETEIGEA<br>LK                                | 239153 | Alcohol dehydrogenase [NADP(+)] OS=Mus musculus GN=Akr1a1 PE=1 SV=3 - [AK1A1_MOUSE]                              | Q9JII6 |
| 676 | DIGQcLTNFSK                                            | 240234 | Cytochrome P450 2C40 OS=Mus musculus GN=Cyp2c40 PE=1 SV=2 - [CP240_MOUSE]                                        | P56657 |
| 677 | NFIELDQTNVAAAQR                                        | 240485 | Heterogeneous nuclear ribonucleoprotein U OS=Mus musculus GN=Hnrpu PE=1 SV=1 - [HNRPU_MOUSE]                     | Q8VEK3 |
| 678 | LGEScIFAPAnVTSEK                                       | 240487 | 3-hydroxyacyl-CoA dehydrogenase type-2 OS=Mus musculus GN=Hsd17b10 PE=1 SV=4 - [HCD2_MOUSE]                      | O08756 |
| 679 | VInDTWAWK                                              | 241952 | Hypoxia up-regulated protein 1 OS=Mus musculus GN=Hyou1 PE=1 SV=1 - [HYOU1_MOUSE]                                | Q9JKR6 |
| 680 | ATLNLsLLK                                              | 242669 | Thiosulfate sulfurtransferase OS=Mus musculus GN=Tst PE=1 SV=3 - [THTR_MOUSE]                                    | P52196 |
| 681 | VETGILRPGMVVTFAP<br>VnITTEVK                           | 61891  | Elongation factor 1-alpha 2 OS=Mus musculus GN=Eef1a2 PE=1 SV=1 - [EF1A2_MOUSE]                                  | P62631 |
| 682 | YPAEGORPIpVSLPLR                                       | 246936 | Cathepsin O OS=Mus musculus GN=Ctso PE=2 SV=1 - [CATO_MOUSE]                                                     | Q8BM88 |



|     |                                                                  |        |                                                                                                                                                                           |               |
|-----|------------------------------------------------------------------|--------|---------------------------------------------------------------------------------------------------------------------------------------------------------------------------|---------------|
| 683 | YADAnnVcHLcHAnTY<br>GcAGPGLQGcEVWPSG                             | 247644 | Epidermal growth factor receptor OS=Mus musculus GN=Egfr PE=1 SV=1 - [EGFR_MOUSE]                                                                                         | Q01279        |
| 684 | GLPDNISSVLNK                                                     | 248804 | UTP-glucose-1-phosphate uridylyltransferase OS=Mus musculus GN=Ugp2 PE=1 SV=3 - [UGPA_MOUSE]                                                                              | Q91ZJ5        |
| 685 | IHLDDANESDHFEnIQS<br>TNWQTMRR                                    | 249380 | Glutamate-cysteine ligase catalytic subunit OS=Mus musculus GN=Gclc PE=1 SV=4 - [GSH1_MOUSE]                                                                              | P97494        |
| 686 | IIDVVYNASNNELVR<br>NNPETETDSSSDLSfV<br>AqTGALLHLPQGFTSSN<br>GSnR | 252300 | 40S ribosomal protein S8 OS=Mus musculus GN=Rps8 PE=1 SV=2 - [RS8_MOUSE]                                                                                                  | P62242        |
| 687 | LnQASFHTPPnVSVcDV<br>NWEK                                        | 66269  | B3 domain-containing protein REM-like 1 OS=Arabidopsis thaliana GN=At2g24690 PE=3 SV=2 - [REML1_ARATH]                                                                    | Q8S8E8        |
| 688 | LEKLEGLLAnVSR                                                    | 252943 | Synaptophysin-like protein 1 OS=Mus musculus GN=Syp11 PE=1 SV=2 - [SYPL1_MOUSE]                                                                                           | O09117        |
| 689 | SIFGEDALAnVSIKPV<br>HOGPDAAVTGHIR                                | 67891  | EMILIN-1 OS=Mus musculus GN=Emilin1 PE=1 SV=1 - [EMIL1_MOUSE]                                                                                                             | Q99K41        |
| 690 | SILSSISAAFPSSHNTGS<br>STVITSK                                    | 255073 | Coatomer subunit beta OS=Mus musculus GN=Copb1 PE=1 SV=1 - [COPB_MOUSE]                                                                                                   | Q9JIF7        |
| 691 | qKSAqNFDDNFNENGT<br>EEGKK                                        | 72652  | Testis-expressed protein 15 OS=Mus musculus GN=Tex15 PE=2 SV=1 - [TEX15_MOUSE]                                                                                            | F8VPN2        |
| 692 | YNDTFWKEFGTNIK                                                   | 69365  | DnaJ homolog subfamily C member 21 OS=Mus musculus GN=Dnajc21 PE=1 SV=1 - [DJC21_MOUSE]                                                                                   | E9Q8D0        |
| 693 | HSVNNTYSQFQDEYSL<br>EEVMK                                        | 259713 | Endoplasmic reticulum protein OS=Mus musculus GN=Hsp90b1 PE=1 SV=2 - [ENPL_MOUSE]                                                                                         | P08113        |
| 694 | GYLLTLnFTKtTTR                                                   | 75209  | Non-specific lipid-transfer protein OS=Mus musculus GN=Scp2 PE=1 SV=3 - [NLTP_MOUSE]                                                                                      | P32020        |
| 695 | LLEFDSTnASEGAqPPG<br>KPYPPYSLAK                                  | 78619  | Lysosome-associated membrane glycoprotein 1 OS=Mus musculus GN=Lamp1 PE=1 SV=2 - [LAMP1_MOUSE]                                                                            | P11438        |
| 696 | DLQMVNLSLR                                                       | 263224 | Glycosylated lysosomal membrane protein OS=Mus musculus GN=Glmpp PE=1 SV=1 - [GLMP_MOUSE]                                                                                 | Q9JHJ3        |
| 697 | VnGTLTQVLLVGAPTH<br>DDVSK                                        | 264262 | Prohibitin-2 OS=Mus musculus GN=Phb2 PE=1 SV=1 - [PHB2_MOUSE]                                                                                                             | O35129        |
| 698 | EWSLESSPAQNWTTPQ<br>PK                                           | 265562 | Phosphatidylinositol-glycan-specific phospholipase D OS=Mus musculus GN=Gpld1 PE=1 SV=1 - [PHLD_MOUSE]                                                                    | O70362        |
| 699 | AVcmLSNTTAIVEAWA<br>DYNFVnGScMLYEANH<br>VR                       | 267805 | ADP-ribosylation factor GTPase-activating protein 1 OS=Mus musculus GN=Arfgap1 PE=1 SV=2 - [ARFG1_MOUSE]                                                                  | Q9EPJ9        |
| 700 | AQTEGINISEEALNHLG<br>EIGTK                                       | 85670  | Tubulin alpha chain-like 3 OS=Mus musculus GN=Tuba3 PE=2 SV=2 - [TBAL3_MOUSE]                                                                                             | Q3UX10        |
| 701 | SNTSPEELGPLANQLTS<br>DYGR                                        | 272388 | Trans-1,2-dihydrobenzene-1,2-diol dehydrogenase OS=Mus musculus GN=Dhdh PE=1 SV=1 - [DHDH_MOUSE]                                                                          | Q9DBB8        |
| 702 | nSTLcDLcIGPLK                                                    | 274104 | RuvB-like 1 OS=Rattus norvegicus GN=Ruvb1 PE=1 SV=1 - [RUVB1_RAT]                                                                                                         | P60123        |
| 703 | GSIISSIIIGK                                                      | 275470 | Talin-1 OS=Mus musculus GN=Tln1 PE=1 SV=2 - [TLN1_MOUSE]                                                                                                                  | P26039        |
| 704 | TIYNWSGYPLLVHK                                                   | 275545 | Serotransferrin OS=Mus musculus GN=Tf PE=1 SV=1 - [TRFE_MOUSE]                                                                                                            | Q921I1        |
| 705 | DnATQEEILHYLEK                                                   | 275693 | Estradiol 17-beta-dehydrogenase 8 OS=Mus musculus GN=Hsd17b8 PE=1 SV=2 - [DHB8_MOUSE]                                                                                     | P50171        |
| 706 | IGPILDNSTLQSEVKPIL<br>EK                                         | 275796 | Phospholipase B-like 1 OS=Mus musculus GN=Plbd1 PE=1 SV=1 - [PLBL1_MOUSE]                                                                                                 | Q8VCI0        |
| 707 | SPFLQVFNNSPDESSYY<br>R                                           | 276463 | Prosaposin OS=Mus musculus GN=Psap PE=1 SV=2 - [SAP_MOUSE]                                                                                                                | Q61207        |
| 708 | FFnFSWR                                                          | 279521 | Serine/threonine-protein phosphatase 2A 65 kDa regulatory subunit A alpha isoform OS=Mus musculus GN=Ppp2r1a PE=1 SV=3 - [2AAA_MOUSE]                                     | Q76MZ3        |
| 709 | LNFSTPASTNIVSVcQA<br>AGLR                                        | 280820 | Protein transport protein Sec23A OS=Mus musculus GN=Sec23a PE=1 SV=2 - [SC23A_MOUSE] Protein transport protein Sec23B OS=Mus musculus GN=Sec23b PE=1 SV=1 - [SC23B_MOUSE] | Q01405;Q9D662 |
| 710 | EASHYSIHDIIVLSYnTS<br>DSTVFPGAVAK                                | 282189 | Endothelin-converting enzyme 1 OS=Mus musculus GN=Ece1 PE=1 SV=1 - [ECE1_MOUSE]                                                                                           | Q4PZA2        |
| 711 | AVLVDLnGTLHIEDAA<br>VPGAQEAALKR                                  | 283164 | Phosphoribosylformylglycinamide synthase OS=Mus musculus GN=Pfas PE=1 SV=1 - [PUR4_MOUSE]                                                                                 | Q5SUR0        |
| 712 | VQGGSSVWGSVLTHnS<br>SAITYQSWGR                                   | 283663 | Lysosome-associated membrane glycoprotein 2 OS=Mus musculus GN=Lamp2 PE=1 SV=2 - [LAMP2_MOUSE]                                                                            | P17047        |
| 713 | KGDILTLLnSTNKDWW<br>K                                            | 284326 | Haloacid dehalogenase-like hydrolase domain-containing protein 2 OS=Mus musculus GN=Hdhd2 PE=1 SV=2 - [HDHD2_MOUSE]                                                       | Q3UGR5        |
| 714 | AGHQSAASNLGSLSL<br>qEAQQLNVSK                                    | 81265  | Complement component C8 alpha chain OS=Mus musculus GN=C8a PE=1 SV=1 - [CO8A_MOUSE]                                                                                       | Q8K182        |
| 715 | AnNSWFQSIK                                                       | 284661 | Spectrin alpha chain, non-erythrocytic 1 OS=Mus musculus GN=Sptan1 PE=1 SV=4 - [SPTN1_MOUSE]                                                                              | P16546        |
| 716 | DALLSALSIQNYHLEcN<br>ETK                                         | 285106 | Mitochondrial import inner membrane translocase subunit TIM16 OS=Mus musculus GN=Pam16 PE=1 SV=1 - [TIM16_MOUSE]                                                          | Q9CQV1        |
| 717 | VILRPLYTPNNqGLYIF<br>QGnSTVR                                     | 285362 | Nicastrin OS=Mus musculus GN=Ncstn PE=1 SV=3 - [NICA_MOUSE]                                                                                                               | P57716        |
| 718 | LPNTcNFSIQGSQLQGY<br>TVLAQcR                                     | 285781 | Spectrin beta chain, non-erythrocytic 1 OS=Mus musculus GN=Sptbn1 PE=1 SV=2 - [SPTB2_MOUSE]                                                                               | Q62261        |
| 719 | FVLINWTGEGVNDVR<br>QFWIFDQnPPDDVAKn<br>SSK                       | 287091 | Aminopeptidase N OS=Mus musculus GN=Anpep PE=1 SV=4 - [AMPN_MOUSE]                                                                                                        | P97449        |
| 720 | LSGSLDLDSLQFN<br>VSNLLNNGSIPK                                    | 104356 | Selenocysteine lyase OS=Mus musculus GN=Scly PE=1 SV=1 - [SCLY_MOUSE]                                                                                                     | Q9JLI6        |
| 721 | LKPYFLTDGTGTVTPA<br>nASGMnDGAAAVVLM<br>IHITETSTNTVPnTSPTA        | 289912 | Drebrin-like protein OS=Mus musculus GN=Dbrn1 PE=1 SV=2 - [DBNL_MOUSE]                                                                                                    | Q62418        |
| 722 | ASASADLnGQAIYEAcQ<br>TILK                                        | 291084 | Platelet glycoprotein 4 OS=Mus musculus GN=Cd36 PE=1 SV=2 - [CD36_MOUSE]                                                                                                  | Q08857        |
| 723 | TELDLRPQGLALFSnVS<br>EAR                                         | 98273  | Probable inactive receptor RLK902 OS=Arabidopsis thaliana GN=RLK902 PE=1 SV=1 - [RLK90_ARATH]                                                                             | Q9LV16        |
| 724 |                                                                  | 277285 | Acetyl-CoA acetyltransferase, cytosolic OS=Mus musculus GN=Acat2 PE=1 SV=2 - [THIC_MOUSE]                                                                                 | Q8CAY6        |
| 725 |                                                                  | 112249 | Xanthine dehydrogenase/oxidase OS=Mus musculus GN=Xdh PE=1 SV=5 - [XDH_MOUSE]                                                                                             | Q00519        |
| 726 |                                                                  | 298895 | Intercellular adhesion molecule 1 OS=Mus musculus GN=Icam1 PE=1 SV=1 - [ICAM1_MOUSE]                                                                                      | P13597        |

|     |                                                              |        |                                                                                                                         |        |
|-----|--------------------------------------------------------------|--------|-------------------------------------------------------------------------------------------------------------------------|--------|
| 727 | KEmAAALNSDVMVLE<br>ADVTVEGFnTANETK                           | 15807  | Protein FAM151A OS=Mus musculus GN=Fam151a PE=1 SV=1 - [F151A_MOUSE]                                                    | Q8QZW3 |
| 728 | NATNVEqSFMTMAAEI                                             | 303584 | Ras-related protein Rab-1A OS=Mus musculus GN=Rab1A PE=1 SV=3 - [RAB1A_MOUSE]                                           | P62821 |
| 729 | NATNVEQAFmTMAAEI<br>nISEGFSGIPDNVDAAF                        | 303585 | Ras-related protein Rab-1B OS=Mus musculus GN=Rab1b PE=1 SV=1 - [RAB1B_MOUSE]                                           | Q9D1G1 |
| 730 | ALPAHR                                                       | 310174 | Vitronectin OS=Mus musculus GN=Vtn PE=1 SV=2 - [VTNC_MOUSE]                                                             | P29788 |
| 731 | VLYTFVlmpInASnALT<br>LAHqLR                                  | 130836 | Adhesion G protein-coupled receptor A2 OS=Mus musculus GN=Adgra2 PE=1 SV=2 - [AGRA2_MOUSE]                              | Q91ZV8 |
| 732 | LEDGFHPDAVAWAnLT<br>NAIR                                     | 312800 | Putative phospholipase B-like 2 OS=Mus musculus GN=Plbd2 PE=1 SV=2 - [PLBL2_MOUSE]                                      | Q3TCN2 |
| 733 | LKPAFIKPYGTVTAANS<br>SFLTGDGASAMLMSSE<br>AQAALQAVSAVQSGN     | 315739 | Trifunctional enzyme subunit beta, mitochondrial OS=Mus musculus GN=Hadhb PE=1 SV=1 - [ECHB_MOUSE]                      | Q99JY0 |
| 734 | LSPGATANEGTLLPG<br>OSPVLr                                    | 317921 | Polypyrimidine tract-binding protein 3 OS=Mus musculus GN=Ptbp3 PE=1 SV=1 - [PTBP3_MOUSE]                               | Q8BHD7 |
| 735 | DYYPIInESLASPLR                                              | 318398 | Cleft lip and palate transmembrane protein 1 homolog OS=Mus musculus GN=C1ptm1 PE=1 SV=1 - [CLPT1_MOUSE]                | Q8VBZ3 |
| 736 | DAILDALEnLSGDELKK                                            | 320757 | Apoptosis-associated speck-like protein containing a CARD OS=Mus musculus GN=Pycard PE=1 SV=1 - [ASC_MOUSE]             | Q9EPB4 |
| 737 | VPIFInINPATNFTGSc<br>QPSAQLR                                 | 321638 | Lysosome-associated membrane glycoprotein 2 OS=Mus musculus GN=Lamp2 PE=1 SV=2 - [LAMP2_MOUSE]                          | P17047 |
| 738 | LDLWNLnNDTEVPTAS<br>ISVEGNPALNR                              | 323986 | Cytoplasmic dynein 1 intermediate chain 2 OS=Mus musculus GN=Dync1i2 PE=1 SV=1 - [DC1I2_MOUSE]                          | O88487 |
| 739 | LnMTLPDALVPTFSISn<br>HSLK                                    | 101666 | Lysosome-associated membrane glycoprotein 1 OS=Mus musculus GN=Lamp1 PE=1 SV=2 - [LAMP1_MOUSE]                          | P11438 |
| 740 | TIHNQEFDPNTLLQcWE<br>AcVEnSSYYNRK                            | 326634 | Aldehyde oxidase 3 OS=Mus musculus GN=Aox3 PE=1 SV=1 - [AOXC_MOUSE]                                                     | G3X982 |
| 741 | KqNAAaAAINGVINTP<br>ELNcKGNtAQsADLR                          | 140568 | Neuron navigator 2 OS=Homo sapiens GN=NAV2 PE=1 SV=3 - [NAV2_HUMAN]                                                     | Q8IVL1 |
| 742 | TVVqYSPNLIIFSGIEElq<br>KDSceSNqNITcR                         | 328677 | Integrin alpha-1 OS=Mus musculus GN=Itga1 PE=1 SV=2 - [ITA1_MOUSE]                                                      | Q3V3R4 |
| 743 | DDLHPTLPAGqYFLnIT<br>YnYPVHSEFDGR                            | 331179 | Cell cycle control protein 50A OS=Mus musculus GN=Tmem30a PE=1 SV=1 - [CC50A_MOUSE]                                     | Q8VEK0 |
| 744 | VIQLGTLVDnLTVDPAT<br>GDILAGcHPNPMK<br>KNVnEPVVAFGPPGST       | 331664 | Serum paraoxonase/lactonase 3 OS=Mus musculus GN=Pon3 PE=1 SV=2 - [PON3_MOUSE]                                          | Q62087 |
| 745 | GELnVSVIVSPVSPFSI<br>EAFGGPK                                 | 132966 | PsbP domain-containing protein 7, chloroplastic OS=Arabidopsis thaliana GN=PPD7 PE=2 SV=1 - [PPD7_ARATH]                | F4J7A7 |
| 746 | nATSYPpMcFQDPVTG<br>QIVnDLLNRK                               | 337465 | Carboxylesterase 1E OS=Mus musculus GN=Ces1e PE=1 SV=1 - [EST1E_MOUSE]                                                  | Q64176 |
| 747 | GASIAHcPNSNLSLSSG<br>LLNVLEVLK                               | 337842 | Guanine deaminase OS=Mus musculus GN=Gda PE=1 SV=1 - [GUAD_MOUSE]                                                       | Q9R111 |
| 748 | QTIGSYDPHPLNVTnHF<br>nYHVnIAVDASESR                          | 147365 | Probable pectate lyase 3 OS=Arabidopsis thaliana GN=AT59 PE=2 SV=1 - [PLY3_ARATH]                                       | Q9M9S2 |
| 749 | HTGPGLSMANAGPNT<br>NGSqFFIcTVKTSWLDN                         | 339583 | Peptidyl-prolyl cis-trans isomerase CYP20-3, chloroplastic OS=Arabidopsis thaliana GN=CYP20-3 PE=1 SV=1 - [CP20C_ARATH] | P34791 |
| 750 | HTGPGLLSMAnSGPNT<br>NGSQFFLTcDKTDWLD                         | 339661 | Peptidyl-prolyl cis-trans isomerase E OS=Mus musculus GN=Ppie PE=1 SV=2 - [PIIE_MOUSE]                                  | Q9QZH3 |
| 751 | NITVLEPVtqPFLQVTn<br>TTVK                                    | 339860 | Carcinoembryonic antigen-related cell adhesion molecule 1 OS=Mus musculus GN=Ceacam1 PE=1 SV=1 - [CEAM1_MOUSE]          | P31809 |
| 752 | GPMNQcLVATGLDVLG<br>NRSYTVR                                  | 340760 | Urokinase plasminogen activator surface receptor OS=Mus musculus GN=Plaur PE=1 SV=1 - [UPAR_MOUSE]                      | P35456 |
| 753 | SPPAPPLPqRPLSPLHPL<br>GcNDSEVLAVAGFALQ<br>NINR               | 340890 | Fetuin-B OS=Mus musculus GN=Fetub PE=1 SV=1 - [FETUB_MOUSE]                                                             | Q9QXC1 |
| 754 | AMLLNQHVPMESHL<br>LQFVnWSSLLPER                              | 341025 | Arylacetylamide deacetylase OS=Mus musculus GN=Aadac PE=1 SV=3 - [AAAD_MOUSE]                                           | Q99PG0 |
| 755 | RFHSELnISESMIPAVIE<br>QYLR                                   | 341184 | Carboxylesterase 1C OS=Mus musculus GN=Ces1c PE=1 SV=4 - [EST1C_MOUSE]                                                  | P23953 |
| 756 | STFFNVLTNSqASAENF<br>PFcTIDPNESR                             | 341853 | Obg-like ATPase 1 OS=Mus musculus GN=Ola1 PE=1 SV=1 - [OLA1_MOUSE]                                                      | Q9CZ30 |
| 757 | YGINTTDIFQTVDLWE<br>GK                                       | 342038 | Transgelin-2 OS=Mus musculus GN=Tagln2 PE=1 SV=4 - [TAGL2_MOUSE]                                                        | Q9WVA4 |
| 758 | TIHNqEFDPTNLLqcWE<br>AcVENSSYYNR                             | 342079 | Aldehyde oxidase 3 OS=Mus musculus GN=Aox3 PE=1 SV=1 - [AOXC_MOUSE]                                                     | G3X982 |
| 759 | FYTEDGNWDLVGNNT<br>PIFFIR                                    | 343886 | Catalase OS=Mus musculus GN=Cat PE=1 SV=4 - [CATA_MOUSE]                                                                | P24270 |
| 760 | AtepQnCHLIEGLEnGSE<br>DIDLPSGLAFVTLGK                        | 344174 | Serum paraoxonase/lactonase 3 OS=Mus musculus GN=Pon3 PE=1 SV=2 - [PON3_MOUSE]                                          | Q62087 |
| 761 | YPQDYQFYIQnFTALPL<br>NTVVPOR                                 | 157140 | Translocon-associated protein subunit alpha OS=Mus musculus GN=Ssr1 PE=1 SV=1 - [SSRA_MOUSE]                            | Q9CY50 |
| 762 | IIDLIPDGYPQIScLPKEE<br>NATIATYPEFGVLDLK<br>IPQAmSALtmLTEIDLS | 344945 | Sodium/potassium-transporting ATPase subunit beta-3 OS=Mus musculus GN=Atp1b3 PE=1 SV=1 - [AT1B3_MOUSE]                 | P97370 |
| 763 | NNNLSGPIPEMGQFETF<br>PPAK                                    | 127189 | Protein BRASSINOSTEROID INSENSITIVE 1 OS=Arabidopsis thaliana GN=BRI1 PE=1 SV=1 - [BRI1_ARATH]                          | O22476 |
| 764 | TnGSPcDPQFIIGcAPcnV<br>IcSIVFONR                             | 346039 | Cytochrome P450 2C40 OS=Mus musculus GN=Cyp2c40 PE=1 SV=2 - [CP240_MOUSE]                                               | P56657 |

|     |                                                                          |        |                                                                                                                                                                                                                                                                                                                                                                                     |               |
|-----|--------------------------------------------------------------------------|--------|-------------------------------------------------------------------------------------------------------------------------------------------------------------------------------------------------------------------------------------------------------------------------------------------------------------------------------------------------------------------------------------|---------------|
| 765 | VS DTVVEPYnATLSVH<br>QLVEnTDETYcIDNEAL<br>YDIcFR                         | 346355 | Tubulin beta-5 chain OS=Mus musculus GN=Tubb5 PE=1 SV=1 - [TBB5_MOUSE]   Tubulin beta-2B chain OS=Mus musculus GN=Tubb2b PE=1 SV=1 - [TBB2B_MOUSE]   Tubulin beta-4A chain OS=Mus musculus GN=Tubb4a PE=1 SV=3 - [TBB4A_MOUSE]   Tubulin beta-4B chain OS=Mus musculus GN=Tubb4b PE=1 SV=1 - [TBB4B_MOUSE]   Tubulin beta-6 chain OS=Mus musculus GN=Tubb6 PE=1 SV=1 - [TBB6_MOUSE] | P99024;P68372 |
| 766 | QETFDAGLQAFQQEGE<br>ANITALKDQLLAAK<br>FHSELnISEMIPAVIEQ<br>YLR           | 346840 | Spectrin alpha chain, non-erythrocytic 1 OS=Mus musculus GN=Sptan1 PE=1 SV=4 - [SPTN1_MOUSE]                                                                                                                                                                                                                                                                                        | P16546        |
| 767 |                                                                          | 346842 | Carboxylesterase 1C OS=Mus musculus GN=Ces1c PE=1 SV=4 - [EST1C_MOUSE]                                                                                                                                                                                                                                                                                                              | P23953        |
| 768 | NTGELnITSILDREETPY<br>FLLTGYALDSR                                        | 347349 | Desmoglein-2 OS=Mus musculus GN=Dsg2 PE=1 SV=3 - [DSG2_MOUSE]                                                                                                                                                                                                                                                                                                                       | O55111        |
| 769 | AATAPLLEAVDnLSAF<br>ASnPEFSSVPAQISPEGR                                   | 348629 | Talin-1 OS=Mus musculus GN=Tln1 PE=1 SV=2 - [TLN1_MOUSE]                                                                                                                                                                                                                                                                                                                            | P26039        |
| 770 | IITESLNTSQYTYEAPV<br>FVLMEEVFLKK<br>KVPGFVcFLTSEDVPGS                    | 348738 | Cysteine sulfinic acid decarboxylase OS=Mus musculus GN=Csad PE=1 SV=1 - [CSAD_MOUSE]                                                                                                                                                                                                                                                                                               | Q9DBE0        |
| 771 | NITGIFnDET VFAKDEV<br>TcVGHII GAVVADTPEH<br>GVFVScDIPMTQFIVNm            | 349165 | Xanthine dehydrogenase/oxidase OS=Mus musculus GN=Xdh PE=1 SV=5 - [XDH_MOUSE]                                                                                                                                                                                                                                                                                                       | Q00519        |
| 772 | nnSMPPSQKFIIHVL DST<br>HLFVOPHVEOMIR<br>QGLLEFVDITATnTSA<br>IQDYLQQLTGAR | 350162 | RNA polymerase II transcription factor B subunit 5 OS=Arabidopsis thaliana GN=TFB5 PE=3 SV=1 - [TFB5_ARATH]                                                                                                                                                                                                                                                                         | Q6NNM0        |
| 773 |                                                                          | 351341 | Glutaredoxin-1 OS=Mus musculus GN=GlrX PE=1 SV=3 - [GLRX1_MOUSE]                                                                                                                                                                                                                                                                                                                    | Q9QUH0        |
| 774 | FqISPQLQFSPEEVLGM<br>VLnYSR                                              | 182609 | Hypoxia up-regulated protein 1 OS=Mus musculus GN=Hyou1 PE=1 SV=1 - [HYOU1_MOUSE]   Hypoxia up-regulated protein 1 OS=Rattus norvegicus GN=Hyou1 PE=1 SV=1 - [HYOU1_RAT]                                                                                                                                                                                                            | Q9JKR6;Q63617 |
| 775 | qVLIInVSLSLDFMSFVF<br>SLFPKG                                             | 164483 | Cilia- and flagella-associated protein 61 OS=Mus musculus GN=Cfap61 PE=1 SV=2 - [CFA61_MOUSE]                                                                                                                                                                                                                                                                                       | Q8CEL2        |
| 776 | SNYLLNNTIAGVEEAD<br>VVLLVGTNPR                                           | 361994 | NADH-ubiquinone oxidoreductase 75 kDa subunit, mitochondrial OS=Mus musculus GN=Ndufs1 PE=1 SV=2 - [NDUS1_MOUSE]                                                                                                                                                                                                                                                                    | Q91VD9        |
| 777 | VIGNSGFVVYQAKLc<br>DSGELVAIK                                             | 166204 | Glycogen synthase kinase-3 beta OS=Mus musculus GN=Gsk3b PE=1 SV=2 - [GSK3B_MOUSE]                                                                                                                                                                                                                                                                                                  | Q9WV60        |
| 778 | GLVLRNNEscSVnYTDF<br>IYqLYSEEGK                                          | 112865 | ATP-dependent 6-phosphofructokinase, platelet type OS=Mus musculus GN=Pfkp PE=1 SV=1 - [PFKAP_MOUSE]                                                                                                                                                                                                                                                                                | Q9WUA3        |
| 779 | FnEDTSHIGILVqLPLPQ<br>HLnESK                                             | 152825 | Bifunctional protein FOLD 1, mitochondrial OS=Arabidopsis thaliana GN=FOLD1 PE=2 SV=1 - [FOLD1_ARATH]                                                                                                                                                                                                                                                                               | A2RVV7        |
| 780 | nYAPLPDInNSIK                                                            | 190626 | Vacuolar protein sorting-associated protein 26B OS=Arabidopsis thaliana GN=VPS26B PE=2 SV=2 - [VP26B_ARATH]                                                                                                                                                                                                                                                                         | Q9T091        |
| 781 | NQQITHAnNTVSSFKR<br>LLTtCYMASENSSQET<br>HSR                              | 382646 | Heat shock protein 105 kDa OS=Mus musculus GN=Hsph1 PE=1 SV=2 - [HS105_MOUSE]                                                                                                                                                                                                                                                                                                       | Q61699        |
| 782 |                                                                          | 393742 | Glutamine-dependent NAD(+) synthetase OS=Mus musculus GN=Nadsyn1 PE=1 SV=1 - [NADE_MOUSE]                                                                                                                                                                                                                                                                                           | Q711T7        |
| 783 | TNSTFNQVVVK                                                              | 400502 | 60S ribosomal protein L18 OS=Mus musculus GN=Rpl18 PE=1 SV=3 - [RL18_MOUSE]                                                                                                                                                                                                                                                                                                         | P35980        |
| 784 | PSWGnHTPIFR                                                              | 401597 | Aspartate aminotransferase, mitochondrial OS=Mus musculus GN=Got2 PE=1 SV=1 - [AATM_MOUSE]                                                                                                                                                                                                                                                                                          | P05202        |
| 785 | VLSLNFSEcHTK                                                             | 402136 | Ras GTPase-activating protein-binding protein 2 OS=Mus musculus GN=G3bp2 PE=1 SV=2 - [G3BP2_MOUSE]                                                                                                                                                                                                                                                                                  | P97379        |
| 786 | KANSTQEPSqqPASSGA<br>SPLSASEGPESPGSSRP<br>SVAGLR                         | 82665  | PDZ and LIM domain protein 5 OS=Mus musculus GN=Pdlim5 PE=1 SV=4 - [PDLI5_MOUSE]                                                                                                                                                                                                                                                                                                    | Q8CI51        |
| 787 | AQAALAVNISAAR                                                            | 34553  | T-complex protein 1 subunit zeta OS=Mus musculus GN=Cct6a PE=1 SV=3 - [TCPZ_MOUSE]                                                                                                                                                                                                                                                                                                  | P80317        |
| 788 | SWSTVGncTAALR                                                            | 411735 | Hemopexin OS=Mus musculus GN=Hpx PE=1 SV=2 - [HEMO_MOUSE]                                                                                                                                                                                                                                                                                                                           | Q91X72        |
| 789 | WLDDGNNTcPATmQIL<br>qNK                                                  | 39667  | U-box domain-containing protein 28 OS=Arabidopsis thaliana GN=PUB28 PE=1 SV=1 - [PUB28_ARATH]                                                                                                                                                                                                                                                                                       | Q9LXE3        |
| 790 | nISVVVATHSPTLAK                                                          | 414859 | Phospholipase D4 OS=Mus musculus GN=Pld4 PE=1 SV=1 - [PLD4_MOUSE]                                                                                                                                                                                                                                                                                                                   | Q8BG07        |
| 791 | FLWSEPqncSATK                                                            | 419733 | Pro-cathepsin H OS=Mus musculus GN=Ctsh PE=1 SV=2 - [CATH_MOUSE]                                                                                                                                                                                                                                                                                                                    | P49935        |
| 792 | TPALVFEHVNTDFK                                                           | 234396 | Casein kinase II subunit alpha OS=Mus musculus GN=Csnk2a1 PE=1 SV=2 - [CSK21_MOUSE]                                                                                                                                                                                                                                                                                                 | Q60737        |
| 793 | ATYNNtqIQVVSATNA<br>SLAR                                                 | 422646 | 28S ribosomal protein S11, mitochondrial OS=Mus musculus GN=Mrps11 PE=1 SV=2 - [RT11_MOUSE]                                                                                                                                                                                                                                                                                         | Q9DCA2        |
| 794 | DlcQSFTNLSR                                                              | 424083 | Cytochrome P450 2C54 OS=Mus musculus GN=Cyp2c54 PE=1 SV=1 - [CP254_MOUSE]                                                                                                                                                                                                                                                                                                           | Q6XVG2        |
| 795 | ESQTIGDqcVYNSTHLG<br>FqR                                                 | 424944 | Alpha-1-acid glycoprotein 8 OS=Mus caroli GN=Orm8 PE=2 SV=1 - [A1AG8_MUSCR]                                                                                                                                                                                                                                                                                                         | P21352        |
| 796 | LEnLSSTESGYTATLTR                                                        | 427192 | Lysosomal alpha-glucosidase OS=Mus musculus GN=Gaa PE=1 SV=2 - [LYAG_MOUSE]                                                                                                                                                                                                                                                                                                         | P70699        |
| 797 | VINAASFYnGTTTLPI S<br>DEDRTPR                                            | 427752 | GMP synthase [glutamine-hydrolyzing] OS=Mus musculus GN=Gmps PE=1 SV=2 - [GUAA_MOUSE]                                                                                                                                                                                                                                                                                               | Q3THK7        |
| 798 | NAVVTVPAYFNDSQR                                                          | 58084  | Probable mediator of RNA polymerase II transcription subunit 37c OS=Arabidopsis thaliana GN=MED37C PE=1 SV=1 - [MD37C_ARATH]   Heat shock 70 kDa protein 5 OS=Arabidopsis thaliana GN=HSP70-5 PE=2 SV=1 - [HSP7E_ARATH]                                                                                                                                                             | Q9S9N1        |
| 799 | GHLnSTncAITQPLTGE<br>LVVEHSDAAIR                                         | 431645 | Down syndrome critical region protein 3 homolog OS=Mus musculus GN=Dscr3 PE=1 SV=1 - [DSCR3_MOUSE]                                                                                                                                                                                                                                                                                  | O35075        |
| 800 | nFDASnNSLEGLSEL R                                                        | 432250 | Receptor-like protein kinase HAIKU2 OS=Arabidopsis thaliana GN=IKU2 PE=1 SV=1 - [IKU2_ARATH]                                                                                                                                                                                                                                                                                        | Q9LJM4        |
| 801 | ISAGTGAGYGVPSQW<br>MQHRTPGVHNQSHVP<br>FAPAELK                            | 55313  | Immunoglobulin superfamily DCC subclass member 4 OS=Mus musculus GN=Igdcc4 PE=2 SV=1 - [IGDC4_MOUSE]                                                                                                                                                                                                                                                                                | Q9EQS9        |
| 802 | IETSINLAWTAGSNNT R                                                       | 442531 | Voltage-dependent anion-selective channel protein 3 OS=Mus musculus GN=Vdac3 PE=1 SV=1 - [VDAC3_MOUSE]                                                                                                                                                                                                                                                                              | Q60931        |
| 803 | nLSLVTDCMEHALTST<br>HPR                                                  | 443862 | 17-beta-hydroxysteroid dehydrogenase type 6 OS=Mus musculus GN=Hsd17b6 PE=1 SV=1 - [H17B6_MOUSE]                                                                                                                                                                                                                                                                                    | Q9R092        |
| 804 | LAqYTIqQYFTLVTSQ<br>OETGNyTR                                             | 445987 | Gamma-aminobutyric acid receptor subunit pi OS=Mus musculus GN=Gabrp PE=2 SV=1 - [GBRP_MOUSE]                                                                                                                                                                                                                                                                                       | Q8QZW7        |

|     |                                                                      |        |                                                                                                                     |        |
|-----|----------------------------------------------------------------------|--------|---------------------------------------------------------------------------------------------------------------------|--------|
| 805 | PmLSVINLTVPTqEGSF<br>TTKMALYKnASYK                                   | 447292 | Alpha-tectorin OS=Mus musculus GN=Tecta PE=1 SV=2 - [TECTA_MOUSE]                                                   | O08523 |
| 806 | EGncSAqSGLAWqDcDF<br>KDAEEAATGECtATVVG<br>YRAEFVAVAnDTGFVDI<br>PQOEK | 448228 | Kininogen-1 OS=Mus musculus GN=Kng1 PE=1 SV=1 - [KNG1_MOUSE]                                                        | O08677 |
| 807 | AInASAnITSDGVEVLG                                                    | 450327 | Collagen alpha-1(XIV) chain OS=Mus musculus GN=Col14a1 PE=1 SV=2 - [COEA1_MOUSE]                                    | Q80X19 |
| 809 | NTNSTLTFVTMSGELK                                                     | 450415 | Phenazine biosynthesis-like domain-containing protein 2 OS=Mus musculus GN=Pbld2 PE=1 SV=1 - [PBLD2_MOUSE]          | Q9CXN7 |
| 810 | GVDHFDIENLTR                                                         | 451487 | Kynurenine formamidase OS=Mus musculus GN=Afmid PE=1 SV=1 - [KFA_MOUSE]                                             | Q8K4H1 |
| 811 | EGSRDDEVVQREEEA<br>IQLDGLNASQIR                                      | 452540 | Endoplasmic reticulum chaperone protein 70 OS=Mus musculus GN=Hsp90b1 PE=1 SV=2 - [ENPL_MOUSE]                      | P08113 |
| 812 | EnSSASEVLDSLSQSVH<br>VKPENLR                                         | 454645 | Ubiquitin carboxyl-terminal hydrolase 19 OS=Mus musculus GN=Usp19 PE=1 SV=1 - [UBP19_MOUSE]                         | Q3UJD6 |
| 813 | LKETEYDVRDHGDLAF<br>VDVPhDSSFOIVK                                    | 457932 | Arginase-1 OS=Mus musculus GN=Arg1 PE=1 SV=1 - [ARG1_MOUSE]                                                         | Q61176 |
| 814 | TVVNISLcALQPYK                                                       | 460906 | Sepiapterin reductase OS=Mus musculus GN=Spr PE=1 SV=1 - [SPRE_MOUSE]                                               | Q64105 |
| 815 | QTQVGIVQYGAnVTHE<br>FNLNK                                            | 461967 | Integrin alpha-1 OS=Mus musculus GN=Itga1 PE=1 SV=2 - [ITA1_MOUSE]                                                  | Q3V3R4 |
| 816 | KSPNIQGEFYISDDTP<br>HQSAYDFTLIPnHTLTK                                | 292449 | 3 beta-hydroxysteroid dehydrogenase/Delta 5->4-isomerase type 3 OS=Mus musculus GN=Hsd3b3 PE=1 SV=3 - [3BHS3_MOUSE] | P26150 |
| 817 | ScHTAVGTSEGWnVPM<br>GLIYnOTGSck                                      | 464268 | Inhibitor of carbonic anhydrase OS=Mus musculus GN=Ica PE=1 SV=1 - [ICA_MOUSE]                                      | Q9DBD0 |
| 818 | ASIESWVSIgnTTcPVT<br>RAPLSDFTLIPnHTLR                                | 467835 | U-box domain-containing protein 25 OS=Arabidopsis thaliana GN=PUB25 PE=2 SV=1 - [PUB25_ARATH]                       | Q9LT79 |
| 819 | RAVLAGIYNTTELVMm<br>QDSSPDFEDTWR                                     | 96602  | Ubiquinone biosynthesis protein COQ9, mitochondrial OS=Mus musculus GN=Coq9 PE=1 SV=1 - [COQ9_MOUSE]                | Q8K1Z0 |
| 820 | VQDAYTLRccPQVHGV<br>VNDTIAFVK                                        | 285436 | Histidine ammonia-lyase OS=Mus musculus GN=Hal PE=1 SV=1 - [HUTH_MOUSE]                                             | P35492 |
| 821 | DAGAcDPDcqLPHLcY<br>PAqSNFSGTR                                       | 470998 | Molybdenum cofactor sulfurylase OS=Mus musculus GN=Mocos PE=1 SV=1 - [MOCOS_MOUSE]                                  | Q14CH1 |
| 822 | LSLDSNnLTALHPALFH<br>nLSR                                            | 472919 | Carboxypeptidase N subunit 2 OS=Mus musculus GN=Cpn2 PE=1 SV=2 - [CPN2_MOUSE]                                       | Q9DBB9 |
| 823 | SNTTSKPSHLVDAHTA<br>EVncLSFnPYSEFILATG<br>SADK                       | 472946 | Histone-binding protein RBBP7 OS=Mus musculus GN=Rbbp7 PE=1 SV=1 - [RBBP7_MOUSE]                                    | Q60973 |
| 824 | TAGAnGTSGFFcVDEG<br>GLPLAQR                                          | 477659 | Serine protease hepsin OS=Mus musculus GN=Hpn PE=1 SV=3 - [HEPS_MOUSE]                                              | O35453 |
| 825 | LNGVVLNKSqDAqLVL<br>LNmPGPPK                                         | 129380 | Solute carrier family 12 member 7 OS=Mus musculus GN=Slc12a7 PE=1 SV=1 - [S12A7_MOUSE]                              | Q9WVL3 |
| 826 | WFHPNITGVEAENLLL<br>TR                                               | 480827 | Tyrosine-protein phosphatase non-receptor type 11 OS=Mus musculus GN=Ptpn11 PE=1 SV=2 - [PTN11_MOUSE]               | P35235 |
| 827 | LLHDGIQPVAAIDSNFA<br>NFTYTPR                                         | 484535 | cGMP-dependent 3',5'-cyclic phosphodiesterase OS=Mus musculus GN=Pde2a PE=1 SV=3 - [PDE2A_MOUSE]                    | Q922S4 |
| 828 | WFGDHDGqEALESahVc<br>LInATATGTEILK                                   | 484903 | NEDD8-activating enzyme E1 regulatory subunit OS=Mus musculus GN=Nae1 PE=1 SV=1 - [ULA1_MOUSE]                      | Q8VBW6 |
| 829 | STNVAVDSGGFDELGG<br>LLKPTVASQNQSLPVA                                 | 485417 | Phosphatidylinositol-binding clathrin assembly protein OS=Mus musculus GN=Picalm PE=1 SV=1 - [PICAL_MOUSE]          | Q7M6Y3 |
| 830 | ASEqILSLVAQFQNNK                                                     | 487635 | Malonyl-CoA decarboxylase, mitochondrial OS=Mus musculus GN=Mlycd PE=1 SV=1 - [DCMC_MOUSE]                          | Q99J39 |
| 831 | ALELSHLNTFVSSQPA<br>GLDFQcAEGGDNLsvG                                 | 489002 | Canalicular multispecific organic anion transporter 2 OS=Mus musculus GN=Abcc3 PE=1 SV=1 - [MRP3_MOUSE]             | B2RX12 |
| 832 | PmKIPEAWANSTVsqQ<br>PSRHPSLDLHAPEPFST                                | 489450 | Probable tRNA methyltransferase 9-like protein OS=Mus musculus GN=Kiaa1456 PE=1 SV=1 - [K1456_MOUSE]                | Q80WQ4 |
| 833 | LQLNIVEMKDENATLD<br>GGDVLFTGR                                        | 120094 | N(G),N(G)-dimethylarginine dimethylaminohydrolase 1 OS=Mus musculus GN=Ddah1 PE=1 SV=3 - [DDAH1_MOUSE]              | Q9CWS0 |
| 834 | LEVDIAVNAANSSLLG<br>GGGVDGcIHR                                       | 306691 | O-acetyl-ADP-ribose deacetylase MACROD1 OS=Mus musculus GN=Macro1 PE=1 SV=2 - [MACD1_MOUSE]                         | Q922B1 |
| 835 | YDTVmAmEYLDMLVN<br>ETLR                                              | 493131 | Cytochrome P450 3A16 OS=Mus musculus GN=Cyp3a16 PE=2 SV=2 - [CP3AG_MOUSE]                                           | Q64481 |
| 836 | GDITSVFcMTEPNVSSS<br>DATnIEcTIQR                                     | 496201 | Acyl-CoA dehydrogenase family member 11 OS=Mus musculus GN=Acad11 PE=1 SV=2 - [ACD11_MOUSE]                         | Q80XL6 |
| 837 | ADLEPESFRPnLSDPSE<br>LLLPDQIEK                                       | 497962 | Oxidation resistance protein 1 OS=Rattus norvegicus GN=Oxr1 PE=1 SV=3 - [OXR1_RAT]                                  | Q4V8B0 |
| 838 | DLLDSVLPFLYNETK                                                      | 498220 | Cullin-associated NEDD8-dissociated protein 1 OS=Mus musculus GN=Cand1 PE=1 SV=2 - [CAND1_MOUSE]                    | Q6ZQ38 |
| 839 | WGMAGGAVVlnmSW<br>WLIDVITQIVYlcGGSSG                                 | 336560 | Protein DETOXIFICATION 32 OS=Arabidopsis thaliana GN=DTX32 PE=3 SV=1 - [DTX32_ARATH]                                | F4I4Q3 |
| 840 | GVQIIVFPEDGIHGFnFT                                                   | 500693 | Biotinidase OS=Mus musculus GN=Btd PE=1 SV=2 - [BTD_MOUSE]                                                          | Q8CIF4 |
| 841 | EQTLREVFESmnlTAY<br>DLSVDTLVDHADRnTF                                 | 133410 | AMP deaminase 2 OS=Mus musculus GN=Ampd2 PE=1 SV=1 - [AMPD2_MOUSE]                                                  | Q9DBT5 |
| 842 | GFLnSSELSLAAGPDR<br>EGSLKdQLALAIGK                                   | 501071 | Elongation factor Ts, mitochondrial OS=Mus musculus GN=Tsfm PE=1 SV=1 - [EFTS_MOUSE]                                | Q9CZR8 |
| 843 | VIISAPADAPmFVmGV<br>NHEKYDNLKIIISNASe<br>TncLAPLAK                   | 503718 | Glyceraldehyde-3-phosphate dehydrogenase OS=Homo sapiens GN=GAPDH PE=1 SV=3 - [G3P_HUMAN]                           | P04406 |
| 844 | ILNqTADMLQLASK                                                       | 318107 | Angiopoietin-related protein 2 OS=Mus musculus GN=Angptl2 PE=2 SV=2 - [ANGL2_MOUSE]                                 | Q9R045 |
| 845 | LHNVSLLGqGQEVVAEN<br>ALDVAAEK                                        | 506944 | Dynein heavy chain 17, axonemal OS=Mus musculus GN=Dnah17 PE=1 SV=2 - [DYH17_MOUSE]                                 | Q69Z23 |

|     |                                                                         |        |                                                                                                                  |        |
|-----|-------------------------------------------------------------------------|--------|------------------------------------------------------------------------------------------------------------------|--------|
| 846 | QLIIEDPYYGNDSDFEV<br>VYQQeLR                                            | 507523 | Low molecular weight phosphotyrosine protein phosphatase OS=Mus musculus GN=Acp1 PE=1 SV=3 - [PPAC_MOUSE]        | Q9D358 |
| 847 | DFNDTSqDPDFTQVVE<br>LDLK                                                | 509225 | Cytoplasmic aconitate hydratase OS=Mus musculus GN=Aco1 PE=1 SV=3 - [ACOC_MOUSE]                                 | P28271 |
| 848 | MKEIAEAYLGYPTNA<br>VITVPAYFNDSQR                                        | 326029 | Heat shock 70 kDa protein 1A OS=Homo sapiens GN=HSPA1A PE=1 SV=1 - [HS71A_HUMAN]                                 | P0DMV8 |
| 849 | SGEcPAALVGGINLLK<br>PNTSVQFMK                                           | 515727 | Fatty acid synthase OS=Mus musculus GN=Fasn PE=1 SV=2 - [FAS_MOUSE]                                              | P19096 |
| 850 | qVcEDAPDNAVQLLGE<br>LMNQSHR                                             | 516532 | N-acetylgalactosamine kinase OS=Mus musculus GN=Galk2 PE=1 SV=1 - [GALK2_MOUSE]                                  | Q68FH4 |
| 851 | ADDPSSYMEVVQAAn<br>ASGNWEELVK                                           | 518760 | Clathrin heavy chain 1 OS=Mus musculus GN=Cltc PE=1 SV=3 - [CLH1_MOUSE]                                          | Q68FD5 |
| 852 | TIASEHPNTTIGVFLcGP<br>EALAETLSK                                         | 520690 | Cytochrome b-245 heavy chain OS=Mus musculus GN=Cybb PE=1 SV=1 - [CY24B_MOUSE]                                   | Q61093 |
| 853 | QcSElcGsnHSFmPIVLE<br>MVKLK                                             | 521346 | Cytochrome c oxidase subunit 2 OS=Acomys wilsoni GN=MT-CO2 PE=3 SV=1 - [COX2_ACOWI]                              | P50672 |
| 854 | EALGNASQLFDSWLK<br>VLQLGTLVDnLSIDPSS                                    | 521614 | Glutamyl aminopeptidase OS=Mus musculus GN=Enpep PE=1 SV=1 - [AMPE_MOUSE]                                        | P16406 |
| 855 | GDIWVGcHPNGQR<br>QEGLRPGWPWPASAA                                        | 108018 | Serum paraoxonase/arylesterase 2 OS=Mus musculus GN=Pon2 PE=1 SV=2 - [PON2_MOUSE]                                | Q62086 |
| 856 | ETVSKPLGVGTEDELV<br>SEFLaDONATLVSr<br>NLTD AFLAEIEKVKGN<br>AESSFN DENLR | 524115 | Peroxisomal targeting signal 1 receptor OS=Mus musculus GN=Pex5 PE=1 SV=2 - [PEX5_MOUSE]                         | O09012 |
| 857 | VIDLWDLAQSAnFTEK                                                        | 524570 | Cytochrome P450 2D10 OS=Mus musculus GN=Cyp2d10 PE=1 SV=2 - [CP2DA_MOUSE]                                        | P24456 |
| 858 | SVIVEPEGIEKEqTYNT<br>LLcPqDTELqDNWSLEL<br>PPNVVEGSAR                    | 525173 | Alpha-2-macroglobulin receptor-associated protein OS=Mus musculus GN=Lrap1 PE=1 SV=1 - [AMRP_MOUSE]              | P55302 |
| 859 | EQTynTLLcPQDTELQD<br>NWSLELPPNVVEGSAR                                   | 526372 | Pregnancy zone protein OS=Mus musculus GN=Pzp PE=1 SV=3 - [PZP_MOUSE]                                            | Q61838 |
| 860 | GTDELLGVMDQVTIIN<br>STLGK                                               | 526791 | Pregnancy zone protein OS=Mus musculus GN=Pzp PE=1 SV=3 - [PZP_MOUSE]                                            | Q61838 |
| 861 | FLEAGIYEVPIIITDSGN<br>PPKSnISILR                                        | 528010 | Cadherin-2 OS=Mus musculus GN=Cdh2 PE=1 SV=2 - [CADH2_MOUSE]                                                     | P15116 |
| 862 | VNSISPGSPASIAGLqV<br>DDEIVEFGSVNTqNFQS<br>VQNVGTVVQHSEGKP<br>LnVTVIR    | 528095 | 26S proteasome non-ATPase regulatory subunit 9 OS=Mus musculus GN=Psm9 PE=1 SV=1 - [PSMD9_MOUSE]                 | Q9CR00 |
| 863 | GRLDVLVNNAYAGVQ<br>AILNTTNK                                             | 530940 | Dehydrogenase/reductase SDR family member 1 OS=Mus musculus GN=Dhrs1 PE=1 SV=1 - [DHRS1_MOUSE]                   | Q99L04 |
| 864 | EGTYSLPTSnFTVPDLE<br>STLGK                                              | 531090 | 2-amino-3-ketobutyrate coenzyme A ligase, mitochondrial OS=Mus musculus GN=Gcat PE=1 SV=2 - [KBL_MOUSE]          | O88986 |
| 865 | DFVENVTSGNAVDFFP<br>VLR                                                 | 531800 | Cytochrome P450 1A2 OS=Mus musculus GN=Cyp1a2 PE=1 SV=1 - [CP1A2_MOUSE]                                          | P00186 |
| 866 | FDVNTSAVQVLIHIGN<br>LDR                                                 | 156889 | Clathrin heavy chain 1 OS=Mus musculus GN=Cltc PE=1 SV=3 - [CLH1_MOUSE]                                          | Q68FD5 |
| 867 | NVTFHGILLDALFEEAN<br>DSWR                                               | 532671 | Fatty acid synthase OS=Mus musculus GN=Fasn PE=1 SV=2 - [FAS_MOUSE]                                              | P19096 |
| 868 | AVANETGAFFFLINGPE<br>IMSK                                               | 174232 | Transitional endoplasmic reticulum ATPase OS=Homo sapiens GN=VCP PE=1 SV=4 - [TERA_HUMAN]                        | P55072 |
| 869 | IHYLYLQNNFITELPLE<br>SFQnATGLR                                          | 533049 | Prolargin OS=Mus musculus GN=Prelp PE=1 SV=2 - [PRELP_MOUSE]                                                     | Q9JK53 |
| 870 | EGTYSLPTSnFTVPDLE<br>LPSWLSTGNyr                                        | 534750 | Ganglioside GM2 activator OS=Mus musculus GN=Gm2a PE=1 SV=2 - [SAP3_MOUSE]                                       | Q60648 |
| 871 | ASATGMIMDSVEVPE<br>ENVLPnVSSLAGPFGeL<br>NTAR                            | 459368 | Glutaryl-CoA dehydrogenase, mitochondrial OS=Mus musculus GN=Gcdh PE=1 SV=2 - [GCDH_MOUSE]                       | Q60759 |
| 872 | PVTFSWKFKNSSSISSQ<br>NIYNFPEVFTGGK                                      | 535474 | Ig mu chain C region OS=Suncus murinus PE=4 SV=1 - [IGHM_SUNMU]                                                  | P20768 |
| 873 | PGqLGNmLHTLSNWLN<br>TSENLLISlqDK                                        | 292554 | COP9 signalosome complex subunit 7 OS=Arabidopsis thaliana GN=CSN7 PE=1 SV=1 - [CSN7_ARATH]                      | Q94JU3 |
| 874 | VEPLPDGSGHFFNLSVq<br>NK                                                 | 448040 | Single-stranded DNA-binding protein WHY1, chloroplastic OS=Arabidopsis thaliana GN=WHY1 PE=1 SV=1 - [WHY1_ARATH] | Q9M9S3 |
| 875 | WKGENVSTGEVEcVLS<br>SLDFLEEVNVYGVVPP<br>GcEGK                           | 160714 | Bile acyl-CoA synthetase OS=Mus musculus GN=Slc27a5 PE=1 SV=2 - [S27A5_MOUSE]                                    | Q4LDG0 |
| 876 | LSALGnVTTcnDYVALV<br>HPDLRETEEILADV<br>KVEVFR                           | 536475 | Eukaryotic translation initiation factor 6 OS=Mus musculus GN=Eif6 PE=1 SV=2 - [IF6_MOUSE]                       | O55135 |
| 877 | LYWVDAFYDRIETILLn<br>GTDRK                                              | 537373 | Pro-low-density lipoprotein receptor-related protein 1 OS=Mus musculus GN=Lrp1 PE=1 SV=1 - [LRP1_MOUSE]          | Q91ZX7 |
| 878 | ANFTLPDVGDFLDEV<br>FIELqREEADKLVR                                       | 538438 | Heterogeneous nuclear ribonucleoprotein U-like protein 1 OS=Mus musculus GN=Hnrnpul1 PE=1 SV=1 - [HNRL1_MOUSE]   | Q8VDM6 |
| 879 | nLSDLIDLVPSLcEDLLS<br>SVDqPLK                                           | 540180 | F-actin-capping protein subunit beta OS=Mus musculus GN=Capzb PE=1 SV=3 - [CAPZB_MOUSE]                          | P47757 |
| 880 | VLVTGAAGqIAYSLLYS<br>IGnGSVFGK                                          | 541409 | Malate dehydrogenase, cytoplasmic OS=Mus musculus GN=Mdh1 PE=1 SV=3 - [MDHC_MOUSE]                               | P14152 |
| 881 | RHDGLPGLAVqWGAIG<br>DVGIVLEAMGTnDTVI<br>GGTLPqR                         | 545812 | Fatty acid synthase OS=Mus musculus GN=Fasn PE=1 SV=2 - [FAS_MOUSE]                                              | P19096 |

|     |                                                     |        |                                                                                                                                                                        |               |
|-----|-----------------------------------------------------|--------|------------------------------------------------------------------------------------------------------------------------------------------------------------------------|---------------|
| 882 | SLGDINDNHIGINNnSVnSTVSK                             | 47653  | Lectin-like protein At1g53060 OS=Arabidopsis thaliana GN=At1g53060 PE=3 SV=1 - [LECT1_ARATH]                                                                           | Q9LNN1        |
| 883 | HHNQSTAINLNNPESQSMHLETR                             | 581937 | Eukaryotic translation initiation factor 3 subunit A OS=Mus musculus GN=Eif3a PE=1 SV=5 - [EIF3A_MOUSE]                                                                | P23116        |
| 884 | QVGNVTKPTVIISQEGG                                   | 583006 | Fatty acid-binding protein, brain OS=Mus musculus GN=Fabp7 PE=1 SV=2 - [FABP7_MOUSE]                                                                                   | P51880        |
| 885 | KVIIWKEENGWTEK                                      | 209077 | Protein SEC13 homolog OS=Mus musculus GN=Sec13 PE=1 SV=3 - [SEC13_MOUSE]                                                                                               | Q9D1M0        |
| 886 | TSAQncTLATTWNR                                      | 585905 | 39S ribosomal protein L37, mitochondrial OS=Mus musculus GN=Mrpl37 PE=1 SV=1 - [RM37_MOUSE]                                                                            | Q921S7        |
| 887 | LFIVGSNssSTR                                        | 585988 | Glutamate-cysteine ligase regulatory subunit OS=Mus musculus GN=Gclm PE=1 SV=1 - [GSH0_MOUSE]                                                                          | O09172        |
| 888 | LNcTSSHLAeCQATLLR                                   | 588652 | FYVE and coiled-coil domain-containing protein 1 OS=Mus musculus GN=Fycol1 PE=1 SV=1 - [FYCO1_MOUSE]                                                                   | Q8VDC1        |
| 889 | VFGSQnLTTVK                                         | 590413 | Hypoxia up-regulated protein 1 OS=Mus musculus GN=Hyou1 PE=1 SV=1 - [HYOU1_MOUSE][Hypoxia up-regulated protein 1 OS=Rattus norvegicus GN=Hyou1 PE=1 SV=1 - [HYOU1_RAT] | Q9JKR6;Q63617 |
| 890 | VTINNwVAnKTEGR                                      | 591230 | Antithrombin-III OS=Mus musculus GN=Serpinc1 PE=1 SV=1 - [ANT3_MOUSE]                                                                                                  | P32261        |
| 891 | LKSELVANNVTLPAGEQR                                  | 592315 | Lamina-associated polypeptide 2, isoforms alpha/zeta OS=Mus musculus GN=Tmpo PE=1 SV=4 - [LAP2A_MOUSE]                                                                 | Q61033        |
| 892 | GELnSTLFSSRPK                                       | 592351 | Prencylcysteine oxidase OS=Mus musculus GN=Pcyox1 PE=1 SV=1 - [PCYOX_MOUSE]                                                                                            | Q9CQF9        |
| 893 | RANNTTYGLAAGVFTK                                    | 185964 | Aldehyde dehydrogenase, cytosolic 1 OS=Mus musculus GN=Aldh1a7 PE=1 SV=1 - [AL1A7_MOUSE]                                                                               | O35945        |
| 894 | cEVLcnQSNKPITLTVESQR                                | 594955 | Transmembrane 9 superfamily member 4 OS=Mus musculus GN=Tm9sf4 PE=1 SV=1 - [TM9S4_MOUSE]                                                                               | Q8BH24        |
| 895 | TTIVlccSPSSYNESETK                                  | 595251 | Kinesin-1 heavy chain OS=Mus musculus GN=Kif5b PE=1 SV=3 - [KINH_MOUSE]                                                                                                | Q61768        |
| 896 | IVHELNTTVPTASFAGK                                   | 595452 | Coiled-coil domain-containing protein 58 OS=Mus musculus GN=Ccdc58 PE=1 SV=1 - [CCD58_MOUSE]                                                                           | Q8R3Q6        |
| 897 | KMNVSPDVNYEELAR                                     | 27844  | 26S proteasome regulatory subunit 6A OS=Mus musculus GN=Psmc3 PE=1 SV=2 - [PRS6A_MOUSE]                                                                                | O88685        |
| 898 | YGVAHEneESECEAmLLSWGSGSPDGLR                        | 600086 | Centromere protein J OS=Mus musculus GN=Cenpj PE=2 SV=2 - [CENPJ_MOUSE]                                                                                                | Q569L8        |
| 899 | ELNLSFcEIKR                                         | 603256 | Ran GTPase-activating protein 1 OS=Mus musculus GN=Rangap1 PE=1 SV=2 - [RAGP1_MOUSE]                                                                                   | P46061        |
| 900 | KLNLdGsnYTLK                                        | 607733 | Prolow-density lipoprotein receptor-related protein 1 OS=Mus musculus GN=Lrp1 PE=1 SV=1 - [LRP1_MOUSE]                                                                 | Q91ZX7        |
| 901 | GLAHRaKLDNNTLSFAK                                   | 610653 | Isocitrate dehydrogenase [NADP] cytoplasmic OS=Mus musculus GN=Idh1 PE=1 SV=2 - [IDHC_MOUSE]                                                                           | O88844        |
| 902 | LVDqFFVmKSSFGIQEPAcIQASPVHFPnGSPRQAGIAQLYGIAGSTNV   | 55021  | Dedicator of cytokinesis protein 4 OS=Mus musculus GN=Dock4 PE=1 SV=1 - [DOCK4_MOUSE]                                                                                  | P59764        |
| 903 | TGDQVKK                                             | 61937  | Fructose-1,6-bisphosphatase 1 OS=Mus musculus GN=Fbp1 PE=1 SV=3 - [F16P1_MOUSE]                                                                                        | Q9QXD6        |
| 904 | VIPAFMcQAGDFTNHnGTGGR                               | 464136 | Peptidyl-prolyl cis-trans isomerase F, mitochondrial OS=Mus musculus GN=Ppif PE=1 SV=1 - [PPIF_MOUSE]                                                                  | Q99KR7        |
| 905 | WGATFPHVPnYSPSTHPNEGLEENYcR                         | 623531 | Plasminogen OS=Mus musculus GN=Plg PE=1 SV=3 - [PLMN_MOUSE]                                                                                                            | P20918        |
| 906 | PIPnQPPTAAHTANFLLNASGSTSTPAPSR                      | 625352 | ATP-citrate synthase OS=Mus musculus GN=Acy PE=1 SV=1 - [ACLY_MOUSE]                                                                                                   | Q91V92        |
| 907 | DPNDHTVcYLLFAnQSEK                                  | 74716  | NADH-cytochrome b5 reductase 3 OS=Mus musculus GN=Cyb5r3 PE=1 SV=3 - [NB5R3_MOUSE]                                                                                     | Q9DCN2        |
| 908 | LAQDFLDSQNLSAYNTSTEPcAHLVSSIGVVGTAEqNRTHSASFFK      | 635655 | Dipeptidyl peptidase 3 OS=Mus musculus GN=Dpp3 PE=1 SV=2 - [DPP3_MOUSE]                                                                                                | Q99KK7        |
| 909 | VInDTWAWKnatLAEQAK                                  | 637196 | D-dopachrome decarboxylase OS=Mus musculus GN=Ddt PE=1 SV=3 - [DOPD_MOUSE]                                                                                             | O35215        |
| 910 | LSNFVNSNNFLVgqIPSDGVLsGfSKNSFIGNLnLcGK              | 637579 | Hypoxia up-regulated protein 1 OS=Mus musculus GN=Hyou1 PE=1 SV=1 - [HYOU1_MOUSE]                                                                                      | Q9JKR6        |
| 911 | KWSIENVsFGSGGALLQK                                  | 531897 | LRR receptor-like serine/threonine-protein kinase FEI1 OS=Arabidopsis thaliana GN=FEI1 PE=1 SV=1 - [FEI1_ARATH]                                                        | C0LGF4        |
| 912 | KAQAEANATAISNLLPFmEYEVHTQLmNK                       | 639728 | Nicotinamide phosphoribosyltransferase OS=Mus musculus GN=Nampt PE=1 SV=1 - [NAMPT_MOUSE]                                                                              | Q99KQ4        |
| 913 | FAVLQTYGDTHTLVLEKINYTGR                             | 112468 | C2 domain-containing protein 5 OS=Mus musculus GN=C2cd5 PE=1 SV=2 - [C2CD5_MOUSE]                                                                                      | Q7TPS5        |
| 914 | IPQSHIQIcENILTSGENLSR                               | 628463 | 4-hydroxyphenylpyruvate dioxygenase OS=Mus musculus GN=Hpd PE=1 SV=3 - [HPPD_MOUSE]                                                                                    | P49429        |
| 915 | GlnDIVTYSVSNSTRPGWFDIREdGVIFVNGSLVLAfHYILDNDsvIEIAR | 271757 | LanC-like protein 1 OS=Mus musculus GN=Lanc1 PE=1 SV=1 - [LANC1_MOUSE]                                                                                                 | O89112        |
| 916 | LRWGMAGGAVVlnmSwwLIDVTQIVYcGGSS                     | 61246  | Cadherin-related family member 2 OS=Mus musculus GN=Cdhr2 PE=1 SV=1 - [CDHR2_MOUSE]                                                                                    | E9Q7P9        |
| 917 | HNFMVSLPnITDSVIEKcVIKHPNGTQETILLnHTFNETQIEWFR       | 96332  | Baculoviral IAP repeat-containing protein 1a OS=Mus musculus GN=Naip1 PE=2 SV=3 - [BIR1A_MOUSE]                                                                        | Q9QWK5        |
| 918 | TNLIVNYLPQNMTQEE LR                                 | 243489 | Protein DETOXIFICATION 32 OS=Arabidopsis thaliana GN=DTX32 PE=3 SV=1 - [DTX32_ARATH]                                                                                   | F414Q3        |
| 919 | KGnNTLNPFIIPASDVPTGcPNOWWPYAGHcY                    | 655908 | Interferon-inducible GTPase 1 OS=Mus musculus GN=Iigp1 PE=1 SV=2 - [IIGP1_MOUSE]                                                                                       | Q9QZ85        |
| 920 | EPNLEVTPqnATAVLGETFTVScHYpCk                        | 658781 | Aconitate hydratase, mitochondrial OS=Mus musculus GN=Aco2 PE=1 SV=1 - [ACON_MOUSE]                                                                                    | Q99K10        |
| 921 | NAVIPqYqALFSMDKcELNVTEdALK                          | 291919 | ELAV-like protein 1 OS=Mus musculus GN=Elav1 PE=1 SV=2 - [ELAV1_MOUSE]                                                                                                 | P70372        |
| 922 |                                                     | 127459 | Macrophage mannose receptor 1 OS=Mus musculus GN=Mrc1 PE=1 SV=2 - [MRC1_MOUSE]                                                                                         | Q61830        |
| 923 |                                                     | 295117 | Polymeric immunoglobulin receptor OS=Mus musculus GN=Pigr PE=1 SV=1 - [PIGR_MOUSE]                                                                                     | O70570        |
| 924 |                                                     | 691330 | ATP-dependent Clp protease ATP-binding subunit clpX-like, mitochondrial OS=Homo sapiens GN=CLPX PE=1 SV=2 - [CLPX_HUMAN]                                               | O76031        |

|     |                                                                        |        |                                                                                                                                                                                                                               |                |
|-----|------------------------------------------------------------------------|--------|-------------------------------------------------------------------------------------------------------------------------------------------------------------------------------------------------------------------------------|----------------|
| 925 | LVQmIGSAIKDEDNDA<br>NLAYWLSNTSTLLFML<br>aaSLK                          | 133745 | Myosin-13 OS=Arabidopsis thaliana GN=XI-G PE=3 SV=1 - [MYO13_ARATH]                                                                                                                                                           | F4IUG9         |
| 926 | LLEPLVTQVTTLVNTS                                                       | 694178 | Catenin alpha-2 OS=Mus musculus GN=Cttna2 PE=1 SV=3 - [CTNA2_MOUSE]                                                                                                                                                           |                |
| 927 | FNSTMKVLmLnSnMV<br>GK                                                  | 138208 | Gamma-aminobutyric acid receptor subunit gamma-1 OS=Mus musculus GN=Gabrg1 PE=2 SV=2 - [GBRG1_MOUSE]                                                                                                                          | Q9R0Y8         |
| 928 | FGDILHVINASDDEWW<br>QAR                                                | 696137 | Disks large homolog 1 OS=Mus musculus GN=Dlg1 PE=1 SV=1 - [DLG1_MOUSE]                                                                                                                                                        | Q811D0         |
| 929 | AVSPEEMLqGFLNnnSH<br>LDKDCGELILQR                                      | 702806 | Serine hydrolase-like protein OS=Mus musculus GN=Serhl PE=1 SV=1 - [SERHL_MOUSE]                                                                                                                                              | Q9EPB5         |
| 930 | DGnASGTTLEALDcIL<br>PPTRPTDKPLR                                        | 709627 | Elongation factor 1-alpha 1 OS=Homo sapiens GN=EEF1A1 PE=1 SV=1 - [EF1A1_HUMAN]                                                                                                                                               | P68104         |
| 931 | NYTLDLAAAAAPQAAP<br>AAAPAPAAAAAPSAS<br>APGSSYPHMQIVLPAL<br>SPTMTMGTVOR | 717605 | Dihydrolypoyllysine-residue acetyltransferase component of pyruvate dehydrogenase complex, mitochondrial OS=Mus musculus GN=Dlat PE=1 SV=2 - [ODP2_MOUSE]                                                                     | Q8BMF4         |
| 932 | KTnGSPcDPQFIIGcAPc<br>NVlcSIVFQNR                                      | 619199 | Cytochrome P450 2C40 OS=Mus musculus GN=Cyp2c40 PE=1 SV=2 - [CP240_MOUSE]                                                                                                                                                     | P56657         |
| 933 | WVDTQVVLALPYDTP<br>VPGYMNNTVNTMR                                       | 517829 | Glycogen phosphorylase, liver form OS=Mus musculus GN=Pygl PE=1 SV=4 - [PYGL_MOUSE] Glycogen phosphorylase, liver form OS=Rattus norvegicus GN=Pygl PE=1 SV=5 - [PYGL_RAT]                                                    | Q9ET01         |
| 934 | DYLnVTAVHLFK                                                           | 130715 | Coagulation factor XIII A chain OS=Mus musculus GN=F13a1 PE=1 SV=3 - [F13A_MOUSE]                                                                                                                                             | Q8BH61         |
| 935 | SnVTRPSEFNyIWIAPIP<br>FLK                                              | 722099 | Aminopeptidase N OS=Mus musculus GN=Anpep PE=1 SV=4 - [AMPN_MOUSE]                                                                                                                                                            | P97449         |
| 936 | KLnASIVTSFVELPLVSn<br>VSLR                                             | 470337 | Endoglin OS=Mus musculus GN=Eng PE=1 SV=2 - [EGLN_MOUSE]                                                                                                                                                                      | Q63961         |
| 937 | LSALGnVTTcNDYVAL<br>VHPDLDTRETEILADV                                   | 723935 | Eukaryotic translation initiation factor 6 OS=Mus musculus GN=Eif6 PE=1 SV=2 - [IF6_MOUSE]                                                                                                                                    | O55135         |
| 938 | HLnSSLPRPqPAILLLTA<br>AQDAAEVLK                                        | 535010 | Torsin-1A-interacting protein 1 OS=Mus musculus GN=Tor1aip1 PE=1 SV=3 - [TOIP1_MOUSE]                                                                                                                                         | Q921T2         |
| 939 | VGSAADIPINISSETDLSL<br>LTATVVPSSGR                                     | 725144 | Filamin-A OS=Mus musculus GN=Flna PE=1 SV=5 - [FLNA_MOUSE]                                                                                                                                                                    | Q8BTM8         |
| 940 | TNGSPcDPTFILGcAPc<br>VlcSIIFQDRFDYK                                    | 725223 | Cytochrome P450 2C37 OS=Mus musculus GN=Cyp2c37 PE=1 SV=2 - [CP237_MOUSE] Cytochrome P450 2C54 OS=Mus musculus GN=Cyp2c54 PE=1 SV=1 - [CP254_MOUSE] Cytochrome P450 2C50 OS=Mus musculus GN=Cyp2c50 PE=1 SV=2 - [CY250_MOUSE] | 654;Q6XVG2;Q91 |
| 941 | YFAETMeqLqnFTAWP<br>DDVLISTYPK                                         | 159543 | Sulfotransferase 1A1 OS=Mus musculus GN=Sult1a1 PE=1 SV=1 - [ST1A1_MOUSE]                                                                                                                                                     | P52840         |
| 942 | EAPDGVMAyHIFlnSTL<br>qqISR                                             | 291349 | ATP-dependent DNA helicase Q-like 4A OS=Arabidopsis thaliana GN=RECQL4A PE=2 SV=1 - [RQL4A_ARATH]                                                                                                                             | Q8L840         |
| 943 | FFnDSIVDPVDSEWFGF<br>YR                                                | 725822 | Palmitoyl-protein thioesterase 1 OS=Mus musculus GN=Ppt1 PE=1 SV=2 - [PPT1_MOUSE]                                                                                                                                             | O88531         |
| 944 | ENFIPTIVNFSAEEISDAI<br>R                                               | 726902 | Cytoplasmic dynein 1 heavy chain 1 OS=Mus musculus GN=Dync1h1 PE=1 SV=2 - [DYHC1_MOUSE]                                                                                                                                       | Q9JHU4         |
| 945 | IIGVDPEGSILAPEELN<br>QTEqTAYEVEGIGYDFI<br>PTVLDLDR                     | 729081 | Cystathionine beta-synthase OS=Mus musculus GN=Cbs PE=1 SV=3 - [CBS_MOUSE]                                                                                                                                                    | Q91WT9         |
| 946 | KAYSLVGVSHVPLNVSE<br>ENSDSnILDSTLmYSQE<br>SLPR                         | 175710 | Coagulation factor VIII OS=Mus musculus GN=F8 PE=2 SV=2 - [FA8_MOUSE]                                                                                                                                                         | Q06194         |
| 947 | IQSAVATLREEVENFAS<br>NFSLPGLPDF                                        | 730695 | Serine hydroxymethyltransferase, cytosolic OS=Mus musculus GN=Shmt1 PE=1 SV=3 - [GLYC_MOUSE]                                                                                                                                  | P50431         |
| 948 | QNATVQGLIqGK                                                           | 187289 | Titin OS=Mus musculus GN=Ttn PE=1 SV=1 - [TITIN_MOUSE]                                                                                                                                                                        | A2ASS6         |
| 949 | VLQVEIARSLNLYLYV<br>SnFSLGSSGQPVHR                                     | 168543 | Macrophage-stimulating protein receptor OS=Mus musculus GN=Mst1r PE=1 SV=3 - [RON_MOUSE]                                                                                                                                      | Q62190         |
| 950 | LFqGPPPGAPPTHpLY<br>PGnASGGVLSGPPmGP<br>EVALcVLSGINSSIFAY<br>GQTSSGK   | 736906 | Atrophin-1 OS=Mus musculus GN=Atn1 PE=1 SV=1 - [ATN1_MOUSE]                                                                                                                                                                   | O35126         |
| 951 | HDGLPLGLAVqWGAIGD                                                      | 738763 | Kinesin-like protein KIN-7I OS=Arabidopsis thaliana GN=KIN7I PE=1 SV=1 - [KN7I_ARATH]                                                                                                                                         | F4JQ51         |
| 952 | VGIVLEAMGTnDTVIG<br>GTLPOR                                             | 745677 | Fatty acid synthase OS=Mus musculus GN=Fasn PE=1 SV=2 - [FAS_MOUSE]                                                                                                                                                           | P19096         |
| 953 | qVVAGLNFDITYTIVQT<br>ncSK                                              | 745520 | Kininogen-1 OS=Mus musculus GN=Kng1 PE=1 SV=1 - [KNG1_MOUSE]                                                                                                                                                                  | O08677         |
| 954 | SISDLGAVNDSVYAITE<br>R                                                 | 121097 | SNF1-related protein kinase regulatory subunit gamma-like PV42a OS=Arabidopsis thaliana GN=PV42A PE=2 SV=1 - [PV42A_ARATH]                                                                                                    | Q9X137         |
| 955 | NQTAEKEEFHQK                                                           | 3657   | Heat shock cognate 71 kDa protein OS=Homo sapiens GN=HSPA8 PE=1 SV=1 - [HSP7C_HUMAN] Heat shock cognate 71 kDa protein OS=Mus musculus GN=Hspa8 PE=1 SV=1 - [HSP7C_MOUSE]                                                     | P11142;P63017  |
| 956 | NINNDTTYcIKK                                                           | 764223 | Endoribonuclease LACTB2 OS=Mus musculus GN=Lactb2 PE=1 SV=1 - [LACB2_MOUSE]                                                                                                                                                   | Q99KR3         |
| 957 | VLTVINQTK                                                              | 769764 | 60S ribosomal protein L35 OS=Mus musculus GN=Rpl35 PE=1 SV=1 - [RL35_MOUSE]                                                                                                                                                   | Q6ZWW7         |
| 958 | YHHYSSnFSIPK                                                           | 18442  | Low affinity immunoglobulin gamma Fc region receptor II OS=Mus musculus GN=Fcgr2 PE=1 SV=2 - [FCGR2_MOUSE]                                                                                                                    | P08101         |
| 959 | SPEHLGLPQSQALEM<br>PNGSTPGGPISSGSQ<br>VDANISVHHHPGPELGV<br>R           | 21543  | Serine/threonine-protein phosphatase 6 regulatory subunit 1 OS=Mus musculus GN=Ppp6r1 PE=1 SV=1 - [PP6R1_MOUSE]                                                                                                               | Q7TSI3         |
| 960 |                                                                        | 774436 | Glutamyl-tRNA(Gln) amidotransferase subunit B, mitochondrial OS=Mus musculus GN=Gatb PE=1 SV=1 - [GATB_MOUSE]                                                                                                                 | Q99JT1         |
| 961 | FINYnQTVSR                                                             | 776791 | ER membrane protein complex subunit 1 OS=Mus musculus GN=Emc1 PE=1 SV=1 - [EMC1_MOUSE]                                                                                                                                        | Q8C7X2         |
| 962 | SRAAEVHNLSE                                                            | 24575  | Transcription factor PIF4 OS=Arabidopsis thaliana GN=PIF4 PE=1 SV=1 - [PIF4_ARATH]                                                                                                                                            | Q8W2F3         |
| 963 | VPAINVNDSVTK                                                           | 777663 | Adenosylhomocysteinase OS=Mus musculus GN=Ahcy PE=1 SV=3 - [SAHH_MOUSE]                                                                                                                                                       | P50247         |

|      |                                                                 |        |                                                                                                                          |        |
|------|-----------------------------------------------------------------|--------|--------------------------------------------------------------------------------------------------------------------------|--------|
| 964  | GRVVYEAQVFNVTAG<br>HGK                                          | 779651 | Dihydropyrimidinase OS=Mus musculus GN=Dpys PE=1 SV=2 - [DPYS_MOUSE]                                                     | Q9EQF5 |
| 965  | HPDASVNFSEFSK                                                   | 783598 | High mobility group protein B1 OS=Homo sapiens GN=HMGB1 PE=1 SV=3 - [HMGB1_HUMAN]                                        | P09429 |
| 966  | IISnAScTtncLAPLAK                                               | 786681 | Glyceraldehyde-3-phosphate dehydrogenase OS=Homo sapiens GN=GAPDH PE=1 SV=3 - [G3P_HUMAN]                                | P04406 |
| 967  | FLIPNASQPESK                                                    | 787629 | 14-3-3 protein zeta/delta OS=Mus musculus GN=Ywhaz PE=1 SV=1 - [1433Z_MOUSE]                                             | P63101 |
| 968  | ILSENEhVSMAWNPyG<br>GR                                          | 789751 | Berberine bridge enzyme-like 14 OS=Arabidopsis thaliana GN=At1g34575 PE=3 SV=1 - [BBE14_ARATH]                           | F4HV09 |
| 969  | KMAAMAKPdCIIcDG<br>NNITVK                                       | 667008 | Fatty acid-binding protein, epidermal OS=Mus musculus GN=Fabp5 PE=1 SV=3 - [FABP5_MOUSE]                                 | Q05816 |
| 970  | NVYPlnFQnGTLIGGAK                                               | 791303 | Putative ALA-interacting subunit 2 OS=Arabidopsis thaliana GN=ALIS2 PE=2 SV=1 - [ALIS2_ARATH]                            | Q67YS6 |
| 971  | LKELNLSFcEIKR                                                   | 793581 | Ran GTPase-activating protein 1 OS=Mus musculus GN=Rangap1 PE=1 SV=2 - [RAGP1_MOUSE]                                     | P46061 |
| 972  | FDSNVSGQSSFGTSPA<br>ADNIEK                                      | 701824 | OCIA domain-containing protein 1 OS=Mus musculus GN=Ociad1 PE=1 SV=1 - [OCAD1_MOUSE]                                     | Q9CRD0 |
| 973  | RANNTTYGLAAGLFTK                                                | 300537 | Retinal dehydrogenase 1 OS=Mus musculus GN=Aldh1a1 PE=1 SV=5 - [AL1A1_MOUSE]                                             | P24549 |
| 974  | VTNEYNESLLYSPEEP                                                | 298135 | NAD kinase 2, mitochondrial OS=Mus musculus GN=Nadk2 PE=1 SV=2 - [NAKD2_MOUSE]                                           | Q8C5H8 |
| 975  | VINAASHFYnGTTTLPI<br>SDED                                       | 618884 | GMP synthase [glutamine-hydrolyzing] OS=Mus musculus GN=Gmps PE=1 SV=2 - [GUA_MOUSE]                                     | Q3THK7 |
| 976  | ALENNMSLDEIVR                                                   | 820330 | Carbamoyl-phosphate synthase [ammonia], mitochondrial OS=Mus musculus GN=Cps1 PE=1 SV=2 - [CPSM_MOUSE]                   | Q8C196 |
| 977  | DGSDIYVDAnISFTQAIL<br>GGK                                       | 822061 | Chaperone protein dnaJ 1, mitochondrial OS=Arabidopsis thaliana GN=ATJ1 PE=2 SV=2 - [DNAJ1_ARATH]                        | Q38813 |
| 978  | SATDDPSRAIqTLqMEL<br>QQIMKgnFSAFmOK<br>QDVSPFNvVAWHGNY<br>TPYK  | 74405  | Glutamine--fructose-6-phosphate aminotransferase [isomerizing] 2 OS=Mus musculus GN=Gfpt2 PE=1 SV=3 - [GFPT2_MOUSE]      | Q9Z2Z9 |
| 979  | QDVSPFNvVAWHGNY<br>TPYK                                         | 839984 | Homogentisate 1,2-dioxygenase OS=Mus musculus GN=Hgd PE=1 SV=2 - [HGD_MOUSE]                                             | O09173 |
| 980  | LqTPLnYTEFQKPicLPS                                              | 288016 | Plasma kallikrein OS=Mus musculus GN=Klkb1 PE=1 SV=2 - [KLKB1_MOUSE]                                                     | P26262 |
| 981  | LQAGTVFVNTYnKTD<br>VAAPFGGFK                                    | 847772 | Cytosolic 10-formyltetrahydrofolate dehydrogenase OS=Mus musculus GN=Aldh1l1 PE=1 SV=1 - [AL1L1_MOUSE]                   | Q8R0Y6 |
| 982  | GIGEnTSSMKEmATLLT<br>SLGVlqSAQEFESSR                            | 289139 | Phosphoprotein OS=Sendai virus (strain Harris) GN=P/V/C PE=1 SV=1 - [PHOSP_SENDH]                                        | P04859 |
| 983  | LGADLmGRnSTIAVnSP<br>VISVnInKESRR                               | 108998 | Adhesion G protein-coupled receptor L2 OS=Mus musculus GN=Adgrl2 PE=1 SV=3 - [AGRL2_MOUSE]                               | Q8JZZ7 |
| 984  | GATVAFlnDEVWNLN<br>AQQK                                         | 116765 | Quinone oxidoreductase-like protein 1 OS=Mus musculus GN=Cryz1 PE=1 SV=1 - [QORL1_MOUSE]                                 | Q921W4 |
| 985  | AEGLGnYSVHLVEVDP<br>QGSLQLLGHDR                                 | 880757 | L-fucose kinase OS=Mus musculus GN=Fuk PE=1 SV=1 - [FUK_MOUSE]                                                           | Q7TMC8 |
| 986  | LTNqTLGFSFAVEQDIP<br>VK                                         | 139226 | Pregnancy zone protein OS=Mus musculus GN=Pzp PE=1 SV=3 - [PZP_MOUSE]                                                    | Q61838 |
| 987  | LMNETTAVALAYGIYK<br>QDLPALEEKPR                                 | 890543 | Heat shock 70 kDa protein 4 OS=Mus musculus GN=Hspa4 PE=1 SV=1 - [HSP74_MOUSE]                                           | Q61316 |
| 988  | VRMQNLLnGSIPIGFG<br>K                                           | 138597 | MDIS1-interacting receptor like kinase 1 OS=Arabidopsis thaliana GN=MIK1 PE=1 SV=1 - [MIK1_ARATH]                        | Q9M0G7 |
| 989  | GSVAYVPQAWIQnCT<br>LQENVLFGQPmNPK<br>SIGGASnLsLLLSNNEF          | 53017  | Canalicular multispecific organic anion transporter 2 OS=Mus musculus GN=Abcc3 PE=1 SV=1 - [MRP3_MOUSE]                  | B2RX12 |
| 990  | TGSLPEEIGSLDNLNQL<br>SASGNK                                     | 151425 | Receptor-like protein kinase HSL1 OS=Arabidopsis thaliana GN=HSL1 PE=2 SV=1 - [HSL1_ARATH]                               | Q9SGP2 |
| 991  | AFAMIIDKLEEDINSSM<br>TNSTAASRPPVTLR<br>SRYPHKPEInSTTHPGA<br>DLK | 478974 | Poly(rC)-binding protein 1 OS=Mus musculus GN=Pcbp1 PE=1 SV=1 - [PCBP1_MOUSE]                                            | P60335 |
| 992  | SRYPHKPEInSTTHPGA<br>DLK                                        | 917939 | Prothrombin OS=Mus musculus GN=F2 PE=1 SV=1 - [THRB_MOUSE]                                                               | P19221 |
| 993  | NVIYINETHTR                                                     | 920319 | Glycerol-3-phosphate acyltransferase 1, mitochondrial OS=Mus musculus GN=Gpam PE=1 SV=2 - [GPAT1_MOUSE]                  | Q61586 |
| 994  | QVDmITnLTEDLNVAS<br>QSNWK                                       | 92602  | ATP-binding cassette sub-family A member 13 OS=Mus musculus GN=Abca13 PE=2 SV=1 - [ABCAD_MOUSE]                          | Q5SSE9 |
| 995  | HGGGGIVANLSEqSLK<br>DGVDR                                       | 940718 | Protein phosphatase 1 regulatory subunit 7 OS=Mus musculus GN=Ppp1r7 PE=1 SV=2 - [PP1R7_MOUSE]                           | Q3UM45 |
| 996  | ASIYQSVFTNSSK                                                   | 6965   | Dimethylaniline monooxygenase [N-oxide-forming] 3 OS=Mus musculus GN=Fmo3 PE=1 SV=1 - [FMO3_MOUSE]                       | P97501 |
| 997  | LLQQSNQSSqFLHSVE<br>R                                           | 948497 | Adhesion G protein-coupled receptor F5 OS=Mus musculus GN=Adgrf5 PE=1 SV=1 - [AGRF5_MOUSE]                               | G5E8Q8 |
| 998  | AELSnHTRPVILVPGcL<br>GnR                                        | 951088 | Phosphatidylcholine-sterol acyltransferase OS=Mus musculus GN=Lcat PE=1 SV=2 - [LCAT_MOUSE]                              | P16301 |
| 999  | GIScMnTTVSESPFK                                                 | 951945 | Inorganic pyrophosphatase OS=Mus musculus GN=Ppa1 PE=1 SV=1 - [IPYR_MOUSE]                                               | Q9D819 |
| 1000 | QGAIVAVTGDGVNDSP<br>ALK                                         | 952986 | Sodium/potassium-transporting ATPase subunit alpha-1 OS=Mus musculus GN=Atp1a1 PE=1 SV=1 - [AT1A1_MOUSE]                 | Q8VDN2 |
| 1001 | NPFGLDAEVSEGGENF<br>SVGQR                                       | 582152 | ABC transporter C family member 11 OS=Arabidopsis thaliana GN=ABCC11 PE=2 SV=2 - [AB11C_ARATH]                           | Q9C8H1 |
| 1002 | DLPVHAcsYcGIHDPAc<br>VVYcNTSK                                   | 243771 | Regulator of nonsense transcripts 1 OS=Mus musculus GN=Upf1 PE=1 SV=2 - [RENT1_MOUSE]                                    | Q9EPU0 |
| 1003 | LSTPLQTNcTASESVVQ<br>SPSVATTASPATK                              | 966051 | Aminoacyl tRNA synthase complex-interacting multifunctional protein 1 OS=Mus musculus GN=Aimp1 PE=1 SV=2 - [AIMP1_MOUSE] | P31230 |
| 1004 | MSqDAFAAIRNcnTSGlq<br>TEWSPPLTmLFLcATK                          | 969276 | DNA polymerase eta OS=Mus musculus GN=Polh PE=1 SV=1 - [POLH_MOUSE]                                                      | Q9JJN0 |
| 1005 | GAAAVFnMSYFGK                                                   | 921932 | Sarcosine dehydrogenase, mitochondrial OS=Mus musculus GN=Sardh PE=1 SV=1 - [SARDH_MOUSE]                                | Q99LB7 |
| 1006 | VDFLQmMNAHNSK                                                   | 989696 | Cytochrome P450 3A41 OS=Mus musculus GN=Cyp3a41a PE=1 SV=2 - [CP341_MOUSE]                                               |        |



|      |                                                             |         |                                                                                                                                   |        |
|------|-------------------------------------------------------------|---------|-----------------------------------------------------------------------------------------------------------------------------------|--------|
| 1007 | VDFLQLMMNSHNNSK                                             | 989697  | Cytochrome P450 3A11 OS=Mus musculus GN=Cyp3a11 PE=1 SV=1 - [CP3AB_MOUSE]                                                         | Q64459 |
| 1008 | EADIQNFTSFISKDSIQK                                          | 991965  | Enoyl-CoA delta isomerase 1, mitochondrial OS=Mus musculus GN=Eci1 PE=1 SV=2 - [ECI1_MOUSE]                                       | P42125 |
| 1009 | LNATNIELATVQPGQN<br>FHMFTK                                  | 113042  | Proteasome subunit alpha type-5 OS=Mus musculus GN=Pasma5 PE=1 SV=1 - [PSA5_MOUSE]                                                | Q9Z2U1 |
| 1010 | LGGWnITGPWAK                                                | 999504  | Endothelin-converting enzyme 1 OS=Mus musculus GN=Ece1 PE=1 SV=1 - [ECE1_MOUSE]                                                   | Q4PZA2 |
| 1011 | GQEEYVLSYEPVNQQE<br>VNYTRPVILGPMK                           | 303990  | Disks large homolog 1 OS=Mus musculus GN=Dlg1 PE=1 SV=1 - [DLG1_MOUSE]                                                            | Q811D0 |
| 1012 | TIGQSTNSILNEFQHmn<br>DTLnQYPPSIncSSK                        | 882950  | Mucin-4 OS=Mus musculus GN=Muc4 PE=2 SV=1 - [MUC4_MOUSE]                                                                          | Q8JZM8 |
| 1013 | DTSLTSGSPTSDDLgqTW<br>NNSKLPGEDQnGLVDP                      | 1026678 | Protein prune homolog 2 OS=Mus musculus GN=Prune2 PE=1 SV=2 - [PRUN2_MOUSE]                                                       | Q52KR3 |
| 1014 | KGGEIEILNNTDNKGIK                                           | 49009   | Ras GTPase-activating-like protein IQGAP2 OS=Mus musculus GN=Iqgap2 PE=1 SV=2 - [IQGA2_MOUSE]                                     | Q3UQ44 |
| 1015 | FVGTSDTGDIVLSPcniS<br>nSFYLLYYnPER                          | 1030104 | Putative F-box protein At1g20657 OS=Arabidopsis thaliana GN=At1g20657 PE=4 SV=1 - [FB12_ARATH]                                    | Q9LM89 |
| 1016 | KYVESGAGSNTSTSTG<br>TSTSSANnAK                              | 52250   | Poly [ADP-ribose] polymerase 1 OS=Arabidopsis thaliana GN=PARP1 PE=1 SV=2 - [PARP1_ARATH]                                         | Q9ZP54 |
| 1017 | TEVLnYTTIPVYLPEITI<br>GAHqGSR                               | 1036118 | NADH dehydrogenase [ubiquinone] 1 alpha subcomplex subunit 10, mitochondrial OS=Mus musculus GN=Ndufa10 PE=1 SV=1 - [NDUAA_MOUSE] | Q99LC3 |
| 1018 | GTSPTQIWcNNSQLPV<br>DHILAGSFETAMR                           | 315080  | Coatomer subunit alpha OS=Mus musculus GN=Copa PE=1 SV=2 - [COPA_MOUSE]                                                           | Q8CIE6 |
| 1019 | EGGPLLYENITFVYnSE<br>qLnGTQR                                | 66828   | Prolyl 3-hydroxylase 2 OS=Mus musculus GN=P3h2 PE=1 SV=1 - [P3H2_MOUSE]                                                           | Q8CG71 |
| 1020 | cNSYDnLPHDnESEEEV<br>GLLHIPALVSPHSAEDV<br>DLSPPDIGVASLDFDPM | 1051739 | Rho GTPase-activating protein 32 OS=Mus musculus GN=Arhgap32 PE=1 SV=2 - [RHG32_MOUSE]                                            | Q811P8 |
| 1021 | SFOcSPPK<br>SQLGsvGKGTGQcFTPFI<br>VNIAPGEDVVQKImMF<br>ANOSK | 1052693 | AT-hook motif nuclear-localized protein 14 OS=Arabidopsis thaliana GN=AHL14 PE=1 SV=1 - [AHL14_ARATH]                             | A1L4X7 |
| 1022 | YSIYKDPAGWLSINPIn<br>GTVDTTAVLDR                            | 711715  | Cadherin-13 OS=Mus musculus GN=Cdh13 PE=1 SV=2 - [CAD13_MOUSE]                                                                    | Q9WTR5 |
| 1023 | nNVSLQLScIDLfK<br>VNASNFNTTFAAQDP                           | 1057062 | Sorting nexin-5 OS=Mus musculus GN=Snx5 PE=1 SV=1 - [SNX5_MOUSE]                                                                  | Q9D8U8 |
| 1024 | TnLQVSLETTPPENSIG<br>AITLPSMLMNNLPAND<br>VELASR             | 1059051 | Adhesion G-protein coupled receptor G2 OS=Mus musculus GN=Adgrg2 PE=1 SV=1 - [AGRG2_MOUSE]                                        | Q8CJ12 |
| 1025 | LGAcnDTLQQLMEVFK<br>FDTISEK                                 | 541904  | Antithrombin-III OS=Mus musculus GN=Serpinc1 PE=1 SV=1 - [ANT3_MOUSE]                                                             | P32261 |
| 1026 | LLVDSLPPSTKPFqEAq<br>SELNqAAADLNQSAGE<br>VVHATR             | 127019  | Talin-2 OS=Mus musculus GN=Tln2 PE=1 SV=3 - [TLN2_MOUSE]                                                                          | Q71LX4 |
| 1027 | NLSLDIGTEVFAPGPGS<br>GlaKqREPR                              | 181206  | Sialidase-1 OS=Homo sapiens GN=NEU1 PE=1 SV=1 - [NEUR1_HUMAN]                                                                     | Q99519 |
| 1028 | LVNAQQVnGSLVHVL<br>YSTPTcYLWELNK                            | 696896  | Lysosomal alpha-mannosidase OS=Mus musculus GN=Man2b1 PE=1 SV=4 - [MA2B1_MOUSE]                                                   | O09159 |
| 1029 | DGVInMSIPIVLPVSAD<br>DK                                     | 1064462 | Bifunctional 3'-phosphoadenosine 5'-phosphosulfate synthase 2 OS=Mus musculus GN=Paps2 PE=1 SV=2 - [PAPS2_MOUSE]                  | O88428 |
| 1030 | EIAEAYLGYPVTAIVIT<br>VPAYFNDSQR                             | 1065206 | Heat shock 70 kDa protein 1A OS=Homo sapiens GN=HSPA1A PE=1 SV=1 - [HS71A_HUMAN]                                                  | P0DMV8 |
| 1031 | LGDAVEqGVINNSVLG<br>YFIGR                                   | 89534   | Glycine--tRNA ligase OS=Mus musculus GN=Gars PE=1 SV=1 - [GARS_MOUSE]                                                             | Q9CZD3 |
| 1032 | LPGAFILGAGAGPFqTL<br>GFNSEFMPIVQTASEH<br>NOPVnGSYFAHK       | 1067755 | Ester hydrolase C11orf54 homolog OS=Mus musculus PE=1 SV=1 - [CK054_MOUSE]                                                        | Q91V76 |
| 1033 | cPLLTfPNDTNVVHTV<br>NTALAAFNTOnnGTYF<br>LVSLDLSFNDFQGGVP    | 159129  | Alpha-2-HS-glycoprotein OS=Mus musculus GN=Ahsg PE=1 SV=1 - [FETUA_MOUSE]                                                         | P29699 |
| 1034 | PEIGncSSLHSLVmVKc<br>NLtGTIPSSMGMLR                         | 1076900 | Leucine-rich repeat receptor-like protein kinase PEPR2 OS=Arabidopsis thaliana GN=PEPR2 PE=1 SV=1 - [PEPR2_ARATH]                 | Q9FZ59 |
